# Supplementary material for: Genome-Wide Identification and Expression Profile of TPS Gene Family in Dendrobium officinale and the Role of DoTPS10 in Linalool Biosynthesis
Source: PubMed Central journal article supplement (PMC7432446; doi:10.3390/ijms21155419), 2020-07-30
Supplement: ijms-21-05419-s001.pdf [file ijms-21-05419-s001.pdf]

## SUPPLEMENTARY MATERIALS

### Genome-wide identification and expression profile of *TPS* gene family in *Dendrobium officinale* and the role of *DoTPS10* in linalool biosynthesis

Zhenming Yu <sup>1,2,†</sup>, Conghui Zhao <sup>1,3,†</sup>, Guihua Zhang <sup>1</sup>, Jaime A. Teixeira da Silva <sup>4</sup>, Jun Duan <sup>1,2,\*</sup>

<sup>1</sup> Key Laboratory of South China Agricultural Plant Molecular Analysis and Genetic Improvement & Guangdong Provincial Key Laboratory of Applied Botany, South China Botanical Garden, Chinese Academy of Sciences, Guangzhou 510650, China; zhenming311@scbg.ac.cn (Z.Y.); zhaoconghui@scbg.ac.cn (C.Z.); zhanggh@scbg.ac.cn (G.Z.)

<sup>2</sup> Center of Economic Botany, Core Botanical Gardens, Chinese Academy of Sciences, Guangzhou 510650, China

<sup>3</sup> University of Chinese Academy of Sciences, No. 19A Yuquan Road, Beijing 100049, China

<sup>4</sup> Independent researcher, P. O. Box 7, Miki-cho post office, Ikenobe 3011-2, Kagawa-ken 761-0799, Japan; jaimetex@yahoo.com

\* Correspondence: duanj@scib.ac.cn; Tel.: +86-020-37252978

† These authors contributed equally to this work.

#### Supplementary table legends

Table S1 Localization was predicted by Plant-mPLoc (<http://www.csbio.sjtu.edu.cn/bioinf/plant-multi/>).

Table S2 Localization was predicted by AtSubP tool (<http://bioinfo3.noble.org/AtSubP/index.php>).

Table S3 Localization was predicted by pLoc-mPlant (<http://www.jci-bioinfo.cn/pLoc-mPlant/>).

Table S4 Secondary structure of DoTPS proteins.

Table S5 Distribution of conserved motifs in *D. officinale* TPS proteins based on the results of MEME analysis.

Table S6 TPS proteins represented in phylogenetic analysis. TPS proteins from *P. equestris* and *A. shenzhenica* were obtained from their genome databases [25]. The other TPS proteins were downloaded from Phytozome version 12.1 database (<http://phytozome.jgi.doe.gov/pz/portal.html>).

Table S7 The FPKM values of *DoTPS* genes in different *D. officinale* organs.

Table S8 The expression values of *DoTPS* genes in response to 200 mM mannitol treatment for 48 h.

Table S9 The FPKM values of *DoTPS* genes exposed to cold treatment (0°C) for 20 h.

Table S10 The expression values of *DoTPS* genes in response to 200 mM mannitol treatment for 48 h.

Table S11 The expression values of *DoTPS* genes in at three flowering stages of *D. officinale*.

Table S12 Functional annotation of DoTPS with Terzyme (<http://www.nipgr.ac.in/terzyme.html>).

Table S13 CGTCA-motif, G-box and MYC motif in the promoter region of *DoTPS* genes.

Table S14 Primers used for RT-qPCR analysis, DoTPS10 cloning and its pET32a and YFP vector construction. Gene-specific primers for real-time reverse transcription quantitative PCR (RT-qPCR) were designed by the PrimerQuest tool (<http://www.idtdna.com/Primerquest/Home/Index>). The *D. officinale* actin gene (*DoEF-1α*) was obtained from NCBI (GenBank accession no. JF825419). F, forward; R, reverse.

#### Supplementary figure legends

Figure S1 Distribution of conserved motifs in *D. officinale* TPS proteins based on the results of MEME analysis.

Figure S2 Content of geraniol and linalool in *D. officinale* at three flowering stages: budding (B), semi-flowering (S) and full flowering (F). Each bar represents the mean ( $\pm$  standard error,  $n = 3$ ) of three independent biological replicates. Different letters above the bars indicate significant differences ( $p < 0.05$ , Duncan's multiple range test).

Figure S3 Gas chromatograms of products yielded by DoTPS10 using GPP as substrate. Each bar represents the mean ( $\pm$  standard error,  $n = 3$ ) of three independent biological replicates. Different letters above the bars indicate significant differences ( $p < 0.05$ , Duncan's multiple range test).

Table S1 Localization was predicted by Plant-mPLOC (<http://www.csbio.sjtu.edu.cn/bioinf/plant-multi/>).

| Protein | Subcellular localization |
|---------|--------------------------|
| DoTPS1  | Chloroplast              |
| DoTPS2  | Chloroplast              |
| DoTPS3  | Chloroplast              |
| DoTPS4  | Chloroplast              |
| DoTPS5  | Chloroplast              |
| DoTPS6  | Chloroplast              |
| DoTPS7  | Chloroplast              |
| DoTPS8  | Chloroplast              |
| DoTPS9  | Chloroplast              |
| DoTPS10 | Chloroplast              |
| DoTPS11 | Chloroplast              |
| DoTPS12 | Chloroplast              |
| DoTPS13 | Chloroplast              |
| DoTPS14 | Chloroplast              |
| DoTPS15 | Chloroplast              |
| DoTPS16 | Chloroplast              |
| DoTPS17 | Chloroplast              |
| DoTPS18 | Chloroplast              |
| DoTPS19 | Chloroplast              |
| DoTPS20 | Chloroplast              |
| DoTPS21 | Chloroplast              |
| DoTPS22 | Chloroplast              |
| DoTPS23 | Chloroplast              |
| DoTPS24 | Chloroplast              |
| DoTPS25 | Chloroplast              |
| DoTPS26 | Chloroplast              |
| DoTPS27 | Chloroplast              |
| DoTPS28 | Chloroplast              |
| DoTPS29 | Chloroplast              |
| DoTPS30 | Chloroplast              |
| DoTPS31 | Chloroplast              |
| DoTPS32 | Chloroplast              |
| DoTPS33 | Chloroplast              |
| DoTPS34 | Chloroplast              |

Table S2 Localization was predicted by AtSubP tool (<http://bioinfo3.noble.org/AtSubP/index.php>).

| Protein | Chloro | Cyto  | Golgi | Mito  | Extracel | Nucl  | Celmemb | Prediction  |
|---------|--------|-------|-------|-------|----------|-------|---------|-------------|
| DOTPS1  | 0.41   | -1.25 | -1.29 | -0.43 | -1.04    | -1.03 | -1.25   | Chloroplast |
| DOTPS2  | 0.86   | -1.14 | -1.29 | -0.56 | -1.06    | -1.28 | -1.27   | Chloroplast |
| DOTPS3  | 1.22   | -1.29 | -1.29 | -1.05 | -1.06    | -1.22 | -1.19   | Chloroplast |
| DOTPS4  | 1.06   | -1.25 | -1.29 | -0.84 | -1.08    | -1.17 | -1.35   | Chloroplast |
| DOTPS5  | 1.40   | -0.99 | -1.29 | -1.59 | -1.04    | -1.00 | -1.36   | Chloroplast |
| DOTPS6  | 0.70   | -1.11 | -1.29 | -0.51 | -1.04    | -0.96 | -1.38   | Chloroplast |
| DOTPS7  | 1.36   | -0.75 | -1.29 | -1.47 | -1.06    | -1.01 | -1.40   | Chloroplast |
| DOTPS8  | -1.13  | -0.92 | -1.29 | -0.76 | -0.73    | -0.48 | -0.42   | Unknown     |
| DOTPS9  | 1.82   | -1.18 | -1.29 | -1.62 | -1.08    | -1.21 | -1.37   | Chloroplast |
| DOTPS10 | 1.20   | -1.42 | -1.29 | -0.93 | -1.06    | -1.19 | -1.35   | Chloroplast |
| DOTPS11 | 1.35   | -0.80 | -1.29 | -1.21 | -1.07    | -1.34 | -1.08   | Chloroplast |
| DOTPS12 | -1.24  | 1.09  | -1.29 | -1.74 | -0.95    | -1.08 | -1.22   | Cytoplasm   |
| DOTPS13 | 1.29   | -0.68 | -1.29 | -1.68 | -1.06    | -1.04 | -1.14   | Chloroplast |
| DOTPS14 | 1.01   | -0.98 | -1.29 | -1.37 | -1.05    | -1.08 | -1.07   | Chloroplast |
| DOTPS15 | 1.85   | -1.01 | -1.29 | -1.83 | -1.10    | -1.33 | -1.17   | Chloroplast |
| DOTPS16 | 1.41   | -0.96 | -1.29 | -1.43 | -1.06    | -1.11 | -1.10   | Chloroplast |
| DOTPS17 | 1.03   | -0.70 | -1.29 | -1.12 | -1.06    | -0.97 | -1.26   | Chloroplast |
| DOTPS18 | 1.32   | -0.99 | -1.29 | -1.52 | -1.05    | -1.15 | -1.19   | Chloroplast |
| DOTPS19 | 0.90   | -1.04 | -1.29 | -0.87 | -1.02    | -0.99 | -1.22   | Chloroplast |
| DOTPS20 | 0.40   | -1.32 | -1.29 | 0.00  | -1.04    | -1.12 | -1.40   | Chloroplast |
| DOTPS21 | 1.19   | -1.38 | -1.29 | -0.97 | -1.05    | -1.19 | -1.28   | Chloroplast |
| DOTPS22 | 1.54   | -0.98 | -1.29 | -1.52 | -1.06    | -1.14 | -1.44   | Chloroplast |
| DOTPS23 | 1.50   | -1.03 | -1.29 | -1.59 | -1.06    | -1.21 | -1.21   | Chloroplast |
| DOTPS24 | 0.54   | -0.96 | -1.29 | -0.73 | -1.00    | -1.04 | -1.07   | Chloroplast |
| DOTPS25 | 1.13   | -1.39 | -1.29 | -1.23 | -1.00    | -1.06 | -1.27   | Chloroplast |
| DOTPS26 | 1.21   | -0.65 | -1.29 | -1.47 | -1.08    | -0.96 | -1.21   | Chloroplast |
| DOTPS27 | 1.44   | -1.40 | -1.29 | -1.33 | -1.07    | -1.27 | -1.15   | Chloroplast |
| DOTPS28 | 1.28   | -1.44 | -1.29 | -1.19 | -1.02    | -1.11 | -1.28   | Chloroplast |
| DOTPS29 | 1.33   | -1.04 | -1.29 | -1.06 | -1.10    | -1.17 | -1.33   | Chloroplast |
| DOTPS30 | 0.87   | -1.25 | -1.29 | -1.08 | -1.03    | -1.18 | -1.28   | Chloroplast |
| DOTPS31 | 1.49   | -1.34 | -1.29 | -1.32 | -1.09    | -1.32 | -1.28   | Chloroplast |
| DOTPS32 | 1.15   | -1.28 | -1.29 | -1.05 | -1.09    | -1.20 | -1.24   | Chloroplast |
| DOTPS33 | 0.77   | -1.15 | -1.29 | -0.72 | -1.04    | -1.15 | -1.15   | Chloroplast |
| DOTPS34 | 1.50   | -1.56 | -1.29 | -1.30 | -1.06    | -1.22 | -1.35   | Chloroplast |

Prediction approach followed the best hybrid-based classifier (AA+PSSM+N-Center-C+PSI-BLAST). Chloro, chloroplast; Cyto, cytoplasm; Mito, mitochondrion; Extracel, extracellular; Nucl, nucleus; Celmemb, cell membrane.

Table S3 Localization was predicted by pLoc-mPlant (<http://www.jci-bioinfo.cn/pLoc-mPlant/>).

| Protein | Subcellular localization |
|---------|--------------------------|
| DoTPS1  | Cytoplasm                |
| DoTPS2  | Chloroplast              |
| DoTPS3  | Chloroplast              |
| DoTPS4  | Chloroplast              |
| DoTPS5  | Cytoplasm                |
| DoTPS6  | Cytoplasm                |
| DoTPS7  | Cytoplasm                |
| DoTPS8  | Cytoplasm                |
| DoTPS9  | Cytoplasm                |
| DoTPS10 | Cytoplasm                |
| DoTPS11 | Cytoplasm                |
| DoTPS12 | Cytoplasm                |
| DoTPS13 | Chloroplast              |
| DoTPS14 | Chloroplast              |
| DoTPS15 | Chloroplast              |
| DoTPS16 | Cytoplasm                |
| DoTPS17 | Chloroplast              |
| DoTPS18 | Chloroplast              |
| DoTPS19 | Chloroplast              |
| DoTPS20 | Chloroplast              |
| DoTPS21 | Cytoplasm                |
| DoTPS22 | Cytoplasm                |
| DoTPS23 | Cytoplasm                |
| DoTPS24 | Cytoplasm                |
| DoTPS25 | Cytoplasm                |
| DoTPS26 | Cytoplasm                |
| DoTPS27 | Cytoplasm                |
| DoTPS28 | Cytoplasm                |
| DoTPS29 | Cytoplasm                |
| DoTPS30 | Chloroplast              |
| DoTPS31 | Chloroplast              |
| DoTPS32 | Chloroplast              |
| DoTPS33 | Cytoplasm                |
| DoTPS34 | Chloroplast              |

Table S4 Secondary structure of DoTPS proteins.

|         | Alpha helix (%) | Extended strand (%) | Beta turn (%) | Random coil (%) |
|---------|-----------------|---------------------|---------------|-----------------|
| DoTPS1  | 61.44           | 5.02                | 4.39          | 29.15           |
| DoTPS2  | 64.45           | 5.21                | 3.48          | 26.86           |
| DoTPS3  | 68.26           | 3.29                | 3.29          | 25.16           |
| DoTPS4  | 57.71           | 6.19                | 3.50          | 32.59           |
| DoTPS5  | 69.09           | 4.80                | 3.02          | 23.09           |
| DoTPS6  | 74.51           | 2.96                | 3.75          | 18.77           |
| DoTPS7  | 69.98           | 4.44                | 3.73          | 21.85           |
| DoTPS8  | 76.56           | 3.65                | 0.00          | 19.79           |
| DoTPS9  | 70.04           | 3.61                | 2.89          | 23.47           |
| DoTPS10 | 66.72           | 3.18                | 3.18          | 26.92           |
| DoTPS11 | 80.95           | 1.30                | 1.73          | 16.02           |
| DoTPS12 | 79.20           | 12.80               | 1.60          | 6.40            |
| DoTPS13 | 69.20           | 3.99                | 2.36          | 24.46           |
| DoTPS14 | 57.71           | 7.42                | 3.30          | 31.57           |
| DoTPS15 | 70.65           | 3.80                | 3.08          | 22.46           |
| DoTPS16 | 71.77           | 3.10                | 3.10          | 22.04           |
| DoTPS17 | 69.82           | 3.27                | 3.09          | 23.82           |
| DoTPS18 | 70.38           | 2.33                | 3.23          | 24.06           |
| DoTPS19 | 74.84           | 2.29                | 3.95          | 18.92           |
| DoTPS20 | 69.24           | 3.61                | 3.78          | 23.37           |
| DoTPS21 | 63.88           | 4.01                | 3.01          | 29.10           |
| DoTPS22 | 69.27           | 4.09                | 3.37          | 23.27           |
| DoTPS23 | 71.10           | 1.97                | 3.59          | 23.34           |
| DoTPS24 | 64.64           | 5.86                | 2.17          | 27.33           |
| DoTPS25 | 64.99           | 5.36                | 3.02          | 26.63           |
| DoTPS26 | 71.04           | 4.01                | 3.46          | 21.49           |
| DoTPS27 | 66.98           | 4.19                | 2.95          | 25.89           |
| DoTPS28 | 64.35           | 5.16                | 3.06          | 27.42           |
| DoTPS29 | 69.09           | 4.73                | 3.64          | 22.55           |
| DoTPS30 | 72.49           | 2.84                | 3.49          | 21.18           |
| DoTPS31 | 62.15           | 5.52                | 3.59          | 28.73           |
| DoTPS32 | 64.07           | 5.80                | 4.07          | 26.05           |
| DoTPS33 | 72.80           | 2.74                | 4.31          | 20.16           |
| DoTPS34 | 65.72           | 4.68                | 3.68          | 25.92           |

Table S5 Distribution of conserved motifs in *D. officinale* TPS proteins based on the results of MEME analysis.

| Name     | Sequences                                     | E-value               | Sites | Width |
|----------|-----------------------------------------------|-----------------------|-------|-------|
| Motif 1  | EPHYSRARKEITKVISLITTJDDIYDVYGTLEELZLFTBAI     | 2.3×e <sup>-657</sup> | 31    | 41    |
| Motif 2  | BVKGLLSLYEASYLAMPGEDILDEAKEFAKKHLK            | 2.7×e <sup>-503</sup> | 31    | 34    |
| Motif 3  | KREWKDLCKAYLVEAKWYNNGYIPTLDEYLENAWISIAAYPL    | 2.8×e <sup>-468</sup> | 28    | 41    |
| Motif 4  | FYPPIIKYSCIIFRLYBDJGTSEFEQKRGDVAKSIQCYMKE     | 1.0×e <sup>-474</sup> | 23    | 41    |
| Motif 5  | NPILLEFAKLDFNMVQSIHQEELKEJSRWWR               | 6.4×e <sup>-463</sup> | 31    | 31    |
| Motif 6  | EISHALELPLHRRMDRLHARWFI                       | 9.1×e <sup>-331</sup> | 33    | 23    |
| Motif 7  | WKIDAVQQLPEYMKICLLALFNTMNDIANELSKEKGLDILP     | 2.4×e <sup>-369</sup> | 26    | 41    |
| Motif 8  | EQLELIDSJQRLGVAYHFEEEIKBLLSKJ                 | 6.1×e <sup>-354</sup> | 30    | 29    |
| Motif 9  | SSKPARRSANYQPSVWDDSFQISLPLPSM                 | 5.9×e <sup>-240</sup> | 22    | 29    |
| Motif 10 | ALLFRLLRZHGYHIS                               | 5.5×e <sup>-212</sup> | 32    | 15    |
| Motif 11 | ELPFARDRLVENYFWALGVYF                         | 1.7×e <sup>-262</sup> | 29    | 21    |
| Motif 12 | EARDKJREMIEKYWKILNREY                         | 9.8×e <sup>-179</sup> | 24    | 21    |
| Motif 13 | FYQYGDGYTEPDHETKDQIISVLIPIPL                  | 5.1×e <sup>-199</sup> | 21    | 29    |
| Motif 14 | TCASYIGMQEVISKEVFDWVT                         | 1.3×e <sup>-101</sup> | 11    | 21    |
| Motif 15 | LFSSFKDEKGSFKPC                               | 3.6×e <sup>-93</sup>  | 24    | 15    |
| Motif 16 | EKQKKRREKLKEEVRKLJDDT                         | 3.1×e <sup>-89</sup>  | 23    | 21    |
| Motif 17 | NSNYEESFKKVLBJPRTAQC                          | 8.0×e <sup>-71</sup>  | 12    | 21    |
| Motif 18 | SNLYLSTDFVHNYGFFLPLKIQHSAQSFSTPYLRLRKKCYSVASN | 8.4×e <sup>-73</sup>  | 4     | 46    |
| Motif 19 | VLTAAYCLEDLTKEALNSLE                          | 1.2×e <sup>-69</sup>  | 13    | 21    |
| Motif 20 | PVSAYETAWVAMVDPDPTSPMFPEYLDWILRNQNBLGFWFDQQHG | 8.3×e <sup>-39</sup>  | 3     | 47    |

Table S6 TPS proteins represented in phylogenetic analysis

| Species              | Sequence                                                                                                                                                                                                                                                                                                                                                                                                                                                                                                                                                                                                                                                                                    |
|----------------------|---------------------------------------------------------------------------------------------------------------------------------------------------------------------------------------------------------------------------------------------------------------------------------------------------------------------------------------------------------------------------------------------------------------------------------------------------------------------------------------------------------------------------------------------------------------------------------------------------------------------------------------------------------------------------------------------|
| <i>Abies grandis</i> | >AAF61453<br>MALVSSAPKSKLHKSLIRSTHHELKPLRRTIPTLGMCRRGKSFTPSVMSLTTAVSDDGLQRRIGDYHSNLWDDDDFIQSLSTPYGEPYSY<br>ERAEKLIGEVKEMFNMPSEMGESMSPLNDLIERLWMVDSVERLGIDRHFKEIKSALDYVYSYWNEKGIGCCRDSVFPDYNSTASGF<br>RTLRLHGYSVSSEVLKVFQDQNGQFAFSPSTKERDIRTVLNLYRASFIAPGKEKVMEEAEIFSSRYLKEAVQKIPVSSLSQEIDYTLLEYGW<br>HTNMPRLETRNYLDVFGHPTSPWLKKKRTQYLDSEKLELAKLEFNIFHSLQQKELQYLSRWWIHSGLPELTFGRHRHVEYYTLSSCI<br>ATEPKHSFRLGFAKTCHLITVLDDIYDTFGTMDIEIEFNEAVRRWNPSEKERLPEYMKEIYMALYEALTMAREAEKTQGRDTLNY<br>ARKAWEVYLDSTYQEAQWIASGYLPTFEEYLENAKVSSGHRAAALPPLLTDVPLPDDVLKIDFPSRFNDLASSFLRLRGDTRCYKA<br>DRDRGEEASSISCYMKDNPGLTEEDALNHINAMINDIIEKELNWEELKPDSPNIPMTARKHAYEITRAFHQLYKYRDGFSVATQETKSLV<br>RRTVLEPVPL |
|                      | >AAB71084<br>MALVSISPLASKSCLRKSLISSIHEHKPPYRTIPNLGMRRRGKSVTPSMSISLATAAPDDGVQRRIGDYHSNIWDDDDFIQSLSTPYGEPYSY<br>QERAERLIVEVKKIFNSMYLDDGRLMSSFNDLMQRLWIVDSVERLGIARHFKEITSALDYVFRYWEENGIGCCRDSIVTDLNSTALGF<br>RTLRLHGYTVSPEVLKAFQDQNGQFVCSPGQTEGEIRSVLNLYRASLIAFPGEKVMEEAEIFSTRYLKEALQKIPVSALSQEIKFVMEYG<br>WHTNLPRLARNYIDTLEKDTSAWLNKNAGKKLLELAKLEFNIFNSLQQKELQYLLRWKESDLPKLTFAHRHVEFYTLASCIAD<br>PKHSFRLGFAKMCHLVTVLDDIYDTFGTIDELELFTSAIKRWNSSIEIHLPEYMKCVYMVVFETVNELTREAEKTQGRNTLNYVRKA<br>WEAYFDSYMEEAKWISNGYLPFEEYHENGKVSSAYRVATLQPILTLNAWLPDYILKIDFPSRFNDLASSFLRLRGDTRCYKADRDR<br>GEEASCISCYMKDNPSTEEDALNHINAMVNDIIEKELNWEELRSNDNIPMLAKKHAFDITRALHHLIYIRDGFSVANKETKKLVMET<br>LLESMLF      |
|                      | >AAF61455<br>MALLSIVSLQVPKSCGLKSLISSNVQKALCISTAVPTLRMRRRQKALVINMKLTTVSHRDDNGGGVLQRRRIADHHPNLWEDDDFIQSL<br>SSPYGGSSYSERAVTVVEEVKEMFNIPNNRELFQSNDLLTRLWMVDSIERLGIDRHFQNEIRVALDYVYSYWKEKEGIGCCRDSFTF<br>DLNSTALALRTLRLHGYNVSSDVLEYFKDQKGFACPAITTEGQITRSVLNLYRASLVAFPGKEKVMEEAEIFSASYLKEVLQKIPVSSFS<br>REIEYVLEYGWHTNLPRLARNYIDVYGQDSYESSNEMPYVNTQKLLKLAKLEFNIFHSLQQKELQYISRWWKDCSSHLTFTRHRHV<br>EYYTMASCISMEPKHSFRLGFKTCHLLTVLDDMYDTFGTLDLDELQFTTAFKRWDLSETKCLPEYMKAVYMDLYQCLNELAQEAE                                                                                                                                                                                                          |

---

KTQGRDTLNYIRNAYESHFDSFMHEAKWISSGYLPTFEEYLKNGKVSSGSRTATLQPILTLDVPLPNYILQEIDYPSRFNDLASSLLRLR  
GDTRCYKADRARGEESAISCYMKDHPGSTEEDALNHINVMISDAIRELNWELLRPDSKSPISKKHAFDITRAFHHLYKYRDGYTVA  
SSETKNLVMKTVLEPVAL

>AAF61454

MALVSILPLSSKSVLHKSWIVSTYEHKAISRTIPNLGLRGRGKSVTHSLRMSLSTAVSDDHGVQRRIVEFHSNLWDDDFIQSLSTPYGAP  
SYRERADRLIVEVKGIFTSISAEDGELITPLNDLIQRLLMVDNVERLGIDRHFKEIKAALDYVYSYWNEKGIGSGSDSGVADLNSTALG  
FRILRLHGYSVSSDVLEHFKEEKEKQFVCSAIQTEEEIKSVLNLFRASLIAFPGEKVMEEAEIFSKIYLKEALQNIADVSSLSREIEYVLEDG  
WQTNMPRLETRNYIDVLGENDRDETLYMNMEKLEIAKLEFNIFHSLQQRELKDLRWWKDSGFSHLTFSRHRHVEFYALASCIETD  
RKHSGFRLGFAKMCHLITVLDDIYDTFGTMEELELFTAFAKRWDP SATDLLPEYMKGLYMVVYETVNEIAREADKSQGRETLNDARR  
AWEAYLDSYMKEAEWISSGYLPTFEEYMETS KVSFGYRIFALQPILTMDVPLTHHILQEIDFPLRFNDLICSILRLKNDTRCYKADRARG  
EEASCISCYMKENPGSTEEDAINHINAMVNNLIKEVNWELLRQDGT AHIACKKHAFDILKGS LHGYKYRDGFSVANKETKNWVVRT  
VLESVPL

>AAB70907

MALLSIVSLQVPKSCGLKSLISSNVQKALCISTAVPTLRMRRRQKALVINMKLTTVSHRDDNGGGVLQRRRIADHHPNLWEDDFIQSL  
SSPYGGSSYSERAETVVEEVKEMFN SIPNNRELFQSNDLLTRLWMVDSIERLGIDRHFQNEIRVALDYVYSYWKEKEGIGCGRDSTFP  
DLNSTALALRTLRLHGYNVSSDVLEYFKDEKGFACPAILTEGQITRSVLNLYRASLVAFPGEKVMEEAEIFSASYLKKVLQKIPVSNLS  
GEIEYVLEYGWHNTLPRLEARNYIEVYEQSGYESLNEMPYMNMKLLQLAKLEFNIFHSLQLRELQSISRWWKESGSSQLTFTRHRHV  
EYYTMASCISMLPKHSAFRMEFVKVCHLVTVLDDIYDTFGTMNELQLFTDAIKRWDLSTTRWLPEYMKGVYMDLYQCINEMVEEAE  
KTQGRDMLNYIQNAWEALFDTFMQEAKWISSYLPTFEEYLKNAKVSSGSRIATLQPILTLDVPLPDYILQEIDYPSRFNELASSILRLRG  
DTRCYKADRARGEESAISCYMKDHPGSIEEDALNHINAMISDAIRELNWELLRPDSKSPISKKHAFDITRAFHHVYKYRDGYTVSN  
NETKNLVMKTVLEPLAL

>AAB71085

MALVSTAPLASKSCLHKSLISSTHELKALSRTIPALGMSRRGKSITPSISMSSTTVVTDGVRRRMGDFHSNLWDDDVIIQSLPTAYEEKS  
YLERAEKLIGE VKNMFNSMSLEDGELMSPLNDLIQRLWIVDSLRLGIHRHFKEIKSALDYVYSYWGENGIGCGRESVVTDLNSTAL  
GLRTLRLHGYPVSSDVFKAFKGQNGQFSCSENIQTDEEIRGVLNLFRASLIAFPGEKIMDEAEIFSTKYLKEALQKIPVSSLSREIGDVLEY  
GWHTYLPREARNYIQVFGQDTENTKSYVKS KLELAKLEFNIFQSLQKRELESLVRWWKESGFPEMTFCRHRHVEYYTLASCIAFE

---



---

PQHSGFRLGFAKTCHLITVLDDMYDTFGTVDELELFTATMKRWDPSSIDCLPEYMKGVYIAVYDTVNEMAREAEAAQGRDTLTYARE  
AWEAYIDSYMQEARWIATGYLPSFDEYYENGVSCGHRISALQPILTMDIPFPDHILKEVDFPSKLNLDLACAILRLRGDTRCYKADRA  
RGEEASSISCYMKDNPVSEEDALDHINAMISDVIKGLNWELLKPDINVPISAKKHAFDIARAFHYGYKYRDGYSVANVETKSLVTRT  
LLESVPL

>AAB70707

MALLSITPLVSRSCSSSHEIKALRRTIPTLGICRPGKSV AHSINMCLTSVASTDSVQRRVGNYSNLWDDDFIQSLISTPYGAPDYRERA  
DRLIGEVDIMFNFKSLEDGGNDLLQRLLLVDVVERLGIDRHFKKEIKTALDYVNSYWNEKGIGCGRESVVTDLNSTALGLRTRLRHG  
YTVSSDVLNVFKDKNGQFSSTANIQIEGEIRGVLNLFRAVAFPGKEKVMDEAETFTSKYLREALQKIPASSILSLEIRDVLEYGWHTNL  
PRLEARNYMDVFGQHTKNKNAAEKLELAKLEFNIFHSLQERELKHVSRWWKDSGPEMTFCRHRHVEYYALASCIAFEPQHSGFR  
LGFTKMSHLITVLDDMYDVFGTVDELELFTATIKRWDPSSAMECLPEYMKGVYMMVYHTVNEMARVAEKAQGRDTLNYARQAW  
ACFDSYMQEAKWIATGYLPTFEEYLENGKVSSAHRPCALQPILTDIPFPDHILKEVDFPSKLNLDLICIILRLRGDTRCYKADRARGE  
SSISCYMKDNPGLTEEDALNHINFMIRDAIRELNWELLKPDNSVPITSKKHAFDISRWWHHGYRYRDGYSFANVETKSLVMRTVIEP  
PL

>AAC05727

MAEISESSIPRRTGNHHGNVWDDDLIHSLSNSPYGAPAYYELLQKLIQEIKHLLLTEMEMDDGDHDLIKRLQIVDTLECLGIDRHFEHEI  
QTAALDYVYRWWNEKGIGESRDSFSKDLNATALGFRALRLHRYNVSSGVLKNFKDENGKFFCNFTGEEGRGDKQVRSMLSLLRAS  
EISFPGEKVMEEAKAFTREYLNQVLAGHGDVTDVDQSLREVKYALEFPWHCSVPRWEARSFLEIYGHNSWLKSNINQKMLKLAK  
LDFNILQCKHHKEIQFITRWRDSDGISQLNFYRKRHVEYYSWVVMCIFEPFSESRIAFKTAICTVLDLDTYDTHATLHEIKIMTEGVR  
RWDLSLTDDLDPDYIKIAFQFFNTVNELIVEIVKRQGRDMTTIVKDCWKRYIESYLQEAEWIATGHIPTFNEYIKNGMASSGMCILNLN  
PLLLLDKLLPDNILEQIHSPSKILDLELTGRIADDLKDFEDEKERGEMASSLQCYMKENPESTVENALNHIKILNRSLEEFNWEFMK  
QDSVPMCCCKFTFNIGRGLQFIYKYRDGLYISDKEVKDQIFKILVHQVPMEE

>AAC05728

MAQISESVSPSTDLKSTESSITSNRHGNMWEDDRIQSLNSPYGAPAYQERSEKLEIEIKLLFLSDMDDSCNDSRDRLIKRLEIVDTVECLG  
IDRHQPEIKLALDYVYRCWNERGIGESRDSLKDLNATALGFRALRLHRYNVSSGVLENFRDDNGQFFCGSTVEEEGAEAYNKHV  
RCMLSLSRASNILFPGEKVMEEAKAFTTNYLKKVLAGREATHVDESLLGEVKYALEFPWHCSVQRWEARSFIEIFGQIDSELKSNLSKK  
MLELAKLDFNILQCTHQKELQIISRWFADSSIASLNFYRKCYVEFYFWMAAAISEPEFSGSRVAFTKIAILMTMLDDLDTYDTHGTLQK

---

---

IFTEGVERRWDVSLVEGLPDFMKIAFEFWLKTSNELIAEAVKAQQQDMAAYIRKNAWERYLEAYLQDAEWIATGHVPTFDEYLNNGT  
PNTGMCVNLNLIPLLLMGEHLPIDILEQIFLPSRFHHLIELASRLVDDARDFQAEKDHGDLSCIECYLKDHPSTVEDALNHVNGLLGN  
CILEMNWKFLKKQDSVPLSCKKYSFHVLRARSIQFMYNQGDGFSISNKVIKDQVQKVLIVPVPI

>AAC24192

MAGVSAVSKVSSLVCDLSSTSGLIRRTANPHPNVWGYDLVHSLKSPYIDSSYRERAEVLVSEIKAMLNPAITGDGESMITPSAYDTAWV  
ARVPAIDGSARPQFPQTVDWILKNQLKDGSWG IQSHFLSDRLLATLSCVLVLLKWNVGD LQVEQGIEFIKSNLELVKDETDQDSLVT  
DFEIIFPSLLREAQSLRLGLPYDLPYIHL LQTKRQERLAKLSREEIYAVPSP LLYSLEGIQDIVEWERIMEVQSQDGSFLSSPASTACVFMH  
TGDAKCLEFLNSVMIKFGNFVPCLYPVDLLERLLIVDNIVRLGIYRHFEKEIKEALDYVYRHWNERGIGWGRLNPIADLETTALGFRL  
RLHRYNVSPAIFDNFKDANGKFCSTGQFNKDVASMLNLYRASQLAFPGENILDEAKSFATKYLREALEKSETSSAWNNKQNL SQEIK  
YALKTSWHASVPRVEAKRYCQVYRPDYARIAKCVYKLPYVNNNEKFLELGKLD FNIIQSIHQEEMKNVTSWFRD SGLPLFTFARERPLE  
FYFLVAAGTYEPQYAKCRFLFTKVA CLQTVLDDMYD TYGTLDELKLFTEAVRRWDLSFTENLPDYMKLCYQIYYDIVHEVAWEAEKE  
QGRELVSFFRKGWEDYLLGYEEAEWLA AEYVPTLDEYIKNGITSIGQRILLSGVLIMDGQLLSQEAELEKVDYPGRRVLT ELNSLSRL  
ADDTKYKA EKARGELASSIECYMKDHPECTEE EALDHIYSILEPAVKELTREFLKPDDVPFACKKMLFEETRVTMVIFKDG DGFVSK  
LEVKDHIKECLIEPLPL

>AAB05407

MAMPSSSLSSQIPTAAHHLTANAQSIPHFSTTLNAGSSASKRRSLYL RWGKGSNKIIACV GEGGATSVPYQSAEKNDLS SSTLVKREFP  
PGFWKDDLIDSLTSSHKVAASDEKRIETLISEIKNMFR CMGYGETNPSAYDTAWVARIPAVDGS DNP HFPETVEWILQNQLKDG SWG  
EGFYFLAYDRILATLACIITLTLWRTGETQVQKGIEFFRTQAGKMEDEADSHRPSGF EIVFPAMLKEAKILGLDLPYDLPFLKQIIEKREA  
KLKRIPTDVLIALPTLLYSLEGLQEIVDWQKIMKLQSKDGSFLSSPASTAAVFMRTGNKKCLDFLNFVLK KFGNHVPCHYPLDLFER  
LWAVDTVERLGIDRHFKEEIKEALDYVYSHWDERGIGWARENPVPDIDDTAMGLRILRLHGYNVSSDVLKTFRDENGEFFCFLGQTQ  
RGVTDMLNVNRC SHVSFPGETIMEEAKLCTERYLRNALENVDAFDKWAFKKNIRGEVEYALKYPWHKSMRPLEARSYIENYGPDDV  
WLGKTVYMPYISNEKYLELAKLDFNKVQSIHQTELQDLRRWWKSSGFTDLNFTRERVTEIYFSPASFIFEPEFSKCREVYTKTSNFTVI  
LDDLYDAHGSLDDLKLFTE SVKRWDLSLVDQMPQMQMKICFVGFYNTFN DIAKEGRERQGRDVLGYIQNVWKVQLEAYTKEAEWSE  
AKYVPSFNEYIENASVSIALGTVVLISALFTGEVLTDEVLSKIDRESRFLQLMGLTGRLVNDTKTYQAERGQGEVASAIQCYMKDHPKIS  
EEEALQHVYSVMENALEELNREFVNNKIPDIYKRLVFETARIMQLFYMQGDGLT LSHDMEIKEHVKNCLFQPVA

---

*Apostasia shenzhenica* >Ash014324

---

---

SNMSEDINLHCSALLFRLLRHGTSSNLLGSNPIFSSLNAMIVSFKGRIQHDKVKESSLHEASFLAVEGEDELEEAGEMAAEQLRRLR  
KNTSLDPKLAEHIDHALELPLHWRMTRLHTRWYIDFYEKQENADSGLELAKLDFNMVQSAYKMELKEISRWWRNGLGLASEELSFA  
RDRLVEAYFWSVGCSEPHFWRCRKEIAKIGCLLSTIDDIYDVYGSLEELFTRAVDCLDSLKAYLLEARWYYSGYTPTLNEYIENGW  
MTIAGPLLSACAYCLSEDLTMEALNNLRFYPDVVRQSSLIARLYDDLGTSNDEILRGDVAKSIQCHMKHKNVSEKAAREHIRWLIRK  
HWKTMNEGLIANQQLLGSFKSHVINFPMAQFIY

>Ash013010

DEVNGDVKSSALLFRLLRQQGFFVSQDMLVNSFKDEEGRYKAELSHDMKGLLSLYEASFLAWEEEELEKAKIFAAEHLIRALGHGES  
ELTEEIEYSMELPLHWRAPRLHALRFIHTCEKRGIDPSLLELAKLDFNMVQSIYKDEVKDVSRWWRNGLSGGKLGFAWDWPVESYI  
WTVGLVYEPQFSRCRRELAKMVCFLHLVDDIYDVYGSPHELELFTTAVERWEVGADELPEYMKICYLALFNTTNDIAYSILKDKGVD  
TLPYLKKAWRDICNAFLAEARWYNSGYIPKFNEYMDNAWISGAAPLSLIFAQCLSQDLTHKSLQHLQPFYPSATRYSTIFRLYDDIGT  
SKVEIERGDVAKSIQCYVNEKNVVEERAREKIKDEIHKYWKLLNQERANFSEFEETFKRAVMNLPRMAHFMY

>Ash000699

SLIDADDLYLVFLQFRLLRQHGYNITSDFDKFRDDERKFKGDLVNDVKGLLSLYEACYLATHEDGLIMDEALSFTKHHLQALSMEG  
SLDGALKALVLHALETPLHRRTQRVEARHYIGLYEHDKEQRNDLLELAKLDFHLLQLLHYEEAKILTLWWEALGLAEKFSTFTRNRI  
IECYFWILCVYSEPHYSRARIMAAKVIALLSISDDFYDVYGTLEELQGLTDVIQRWDVEAANRLNDYMRITLNVWNDTFNEFEELSSD  
QKSYRVNYIKEMLKVISRAWLQETKWRDEEYIPPLKEHLEVSGVTTCYNIVSCASYLGMDDVATKEVFDWMLTFPKYVHHACMICRI  
VDDIRSHEFEQKRNHFASTVQSYMKEHEVSVDQACNALFKIVDDEWKSLNQEFNLNSISKYPRAILNKVVNYVRFLDTIY

>Ash001839

ADTDHEHDLHFVALHFRLLRQQRYHVSSDVFAKFLDENGDFVESLKGDIKGMLSLYEAAHFGMPGEEILDKAIGFTEFHLNNNLPLI  
ELDPELAVLVSSALDFPLAKRIDRPKAKSYLSIYENDEITCNKLLLEFAKMDFALLQAMHQDEARSISMWWKDSGYAEKLPFARDRV  
MECYFWVLSVYHEPCYSRARLMMTKIISQISVVDDIYDLYGTSEELQIFTDAFERWELESA AQLPEYMKLSFLTIQKTFKDFEAE LAPEN  
NSFRKEYLKNELKQIVRSYLQESKWARERYIPKLEDHLKVTLVTAGYSFLT CASYMGHGNIPREIFDWITSLPDIKSSCIIGRLMNDI  
VTYELEQKRNHVASTIQCYVMEHGCLLEEEACKLMMEMVDDSWKIINREYVVCCKNIPLSLMVPVAVNLARFNFYFVY

>Ash001894

TRVDELHDLHTVALRFRLLRQQRYDVSSDVFAKFLDENGDFMESLNDIKSMLSLYEAAHFGMPPEEEILEKAI SFTEFHLLNINNLPSN  
LEPHLAMMVSSAMDFPLAKRIDRPKTRSYLSIYENDHEGYYYCNQFLHFAKVDFALLQAMHQDEARNISMWWKDAGTAKVFPFS

---

---

RDRIIECYFWVLSVYYEPCYSRARLMMTKIISQMSILDDIYDVYGTLEELQIFTD AIQRWDLKSIAQLPDYMQYSFRIIQKIFRDFEAELAP  
ENNSFRLEYLKNELKRVVQSYLQEAKWASQCHVPKLEDHLRVSLVTAGYSFLT CASYIGMHERITRDVFDWITSLPNI IKASCIIGRIM  
NDVVTYKLEQKRNVASTVQCYIMEHGCSNEEACKKLMEMAGDAWKIINREFVMHDKSLPLFTMMPAVNLARFNLYVY

>Ash010138

NDEEISDISTCAMAFRLLRMHGYDLSSDAFSQFSDATQFKNTVQGHFKDYDAAIELCKVSQTQVLAEEPVLEKLN SWVTRFLKEELN  
SNAILSLDTAQEADYVLRFPFYANLERLEHKRNIEHYNFGSLQMLKTSFLSSIDRRILELAVDEFSNSQLIYRKELQYLESWVKEIKLDQL  
KFSRQKQTYCYLSAAASLFSADLS DARICWAKGGVLT TVVDDFFDGGGS AEEQSNLIMLIEGW HENHQKDFCSESVEIIFALYNTVN  
DLSMKAFFPQKR DVTSHIVNIWLHMMKSMKVEAEWLKNNTVPSIDEYMAHAIPSFALGPVLP SLYFVGPV VSEDAIESPEYFNLFKL  
VSKLGRLLNDYQGFERDLKDGMNSVSLRIQHNGSISKEDARRETMRTIESTRAELLGLVLQEKGSKVPK SCKELFWKMSKILHLFY

>Ash010892

TDMEESIDLHGIALLFRLFRVYGD LQGSQSLKSLVRSIKSESMIFKANIEQDIKGLLSVYEASHLAFEGDDELDEAGEFAAEKLRERLK  
NSSLDPKLGEQIDYALEIPLHWRVPRFHARWFIDFHSNQKKIDSNLLELAKLDYNRIQS LYKNEKELSRWWKDLGLVCEKLG FARN  
RPVENYLWALGSAYEPQFWRIRKENFKLNCVVVIDDIYDVFGLDELELFTNAIERWIIAPELPEYMKICLLAFFNTVDDIANKILLEK  
GLHIQLYLRQSCVDVCKAYFKEARWYHGGHNPNLHEYLENAWISIAAIIVLTEAYCLSDDLTAEALQNFKFPDVVLHSSILIRLYND  
LGTLSAEMQRGDVSKSVQCYMNDKNVSESDARKYIKRILIRKHWKALNETLAANPNLLGSFKTG LLLGLPQMSQFLY

>Ash010893

SDMEESVNLHGIALLFRLFREYGD LQNSQLSLES LIRSIKSESLKVNIEQDIKGLLSVYEASYLAFGGEDDELDEAGEFAAKQLSELRKNSS  
LDPKLGEQIDYALEIPLHWRVPRLHARWFIDFHSNQKKIDSNLLELAKLDYNRIQS LYKNEKELSRWWKDLNLVCEELGFARNRPM  
ENYLWALGCAYEPQFWRSRKENFKIICLIAIDDIYDIFGLDELELLTNAIEQWIIAPELPEYMKICLLAFFNTVNDIANKILLEKGLHIQ  
LYLRQSCVDICKAYL TEARWYHGGHTPKLHEYLENAWISIGANVVLTEAYCLSDDLTAEALENFKFPDVLRHSSILIRLYDDLGTSSA  
EMQRGDVPKSVQCYMNDKNVSESDARKYIKRFLIRKHWKALNERFAANPNLLGSFKTG LLLGLPRISQFLY

>Ash021680

MHVNFFVDCFKRFMNKEGNFEVSLCYDTKGLMSLYEASYVDMGEEILCKAREFSTKHLKASERYPENIDAE EKIIKRSLSNPIYKSLPR  
FEARHFIGGYKGNIGASKVLKDLAIMDFNTVQSLHKSELSKVVR

---

*Arabidopsis thaliana*

>AtTPS29

DIIVGEDDLETISIMFEVFKLYGHKMSCDAFDRFRGNDGRFKESLVRDFRGMQLQFEVAHLGTPCEVIMDEALS FTRNHLES LTSGNAS

---

---

TASPHLLKHIQNSLYIPRYCNIEVLVAREYISYYEQEEGHDEILLKFAKLNFNFCQFHVYVQELKTLTKWWRDLDLASKLPYIRDRLVES  
HLVALGPYFEPHYSLGRIIVAKINMIMVVVDDTYDAYATLPQVKALTECLQSIEVSDLPDYLRIVLGSFLDVMGEIEREMRPLGRLYRV  
KQVVEKIKIITKAYQEIAKWARTGHVSTFDEYMKVGVLTAGMADYAAAYCFIGMEDINEKEAFEWLNSNPLIHKHLTAMFRLANDVGT  
YETEINRGEVANGLNCYMKQYGVTKEEASRELKMKMYVYRKKVVVEEFMHVPRQVLLRCLNIARIFDVFY

>AtTPS22

MLFTDEDDLETTAIMFEVFRLYGHKISCDVDFRFKGVDAKFKEHLVSDVRGMLQLYEAAHLATPFETILDEALSFTRYHLESLAGQQA  
TAPHISRHILNALYKPRFLKMEIIAAREYIHFYQKEGHDETLKFAKLNFNFCQLHYVRELKTLTKWWKDIDLKPYKLPYIRDRLLETFIG  
VMAVYLEPHYSLGRIIATKVSQVIVVMDDTCDAYGTGFSEVRSLIDSLERWDPGAIKLPSCLRIVIQSIVETMEDIEREMKPRGRSSSVQD  
TVEEIKIMGRAYAEISKWARAGHVPTFDDYIELGLDSSGIRCFAMYSFISMEDCEENQTNAWFKSKPKMLRALSIVIFRLTNDIAGFEE  
MRRGEVVNGVNCYVKQHNVTKELAVREIKKMIRDNYKIMMEEFLSVSRPILVRCFNIVRLVNLYY

>AtTPS23

WKCDKEEDLHATSLEFRLRQHGFVSENIFDVIIDQIESNTFKTNNINGIISLYEASLYSTKSDTKLHKVIRPFATEQIRKFVDDDEDTKNI  
EVKAYHALEMPYHWRMRRLDTRWYIDAYEKKHDMNLVLIEFAKIDFNIVQAAHQEDLKYVSRWWKDTCLTNQLPFVRDRIVENYF  
WTVGLIYEPQFGYIRRIMTIVNALVTTIDDIYDIYGTLEELFTSMVENWDVNRGELPEYMRLCFLILYNEINGIGCDILKYKKIDVIPY  
LKKSADLCRTYLVEAKWYKRGYKPSLEEYMQNAWISISAPTILIHFYCVFSDQISVQNLLETLSQHRQHIVRCSATVLRRLANDLGTSP  
ELARGDVLKSVQCYMHETGASEERARDHVHQMISDMWDDMNSETKSRSRGFKEAAMNLARMSQCMY

>AtTPS28

EMMDGENDLYTVSIIFWVFRTYGHNISSDIFNRFKGHNGKFKECLATDAKGILSLYEAAHMGTTTTDYILDEALSFTLSYLES  
LAANGTC  
KPNLVRIRNALGLLQNKNEILVAKEYIRFYEQEEDCDKILEFSMLNLKFLQLHYLQELKLLTKWYKEQDFESKLPPYRDRIVELH  
LATLAYINPKYSRVRIILTMIYTIQIILDDTCDRYASLREVESLAATIERWDHHEGLPDYLSVAKFIFHTFQEFEREVSSES  
GGSYSLK  
ATIEDCKRMMRSNLQLAKWAVTGHLPSFDEYLDVAGVEIAVYFTVAGILLGMENINKKEAYEWLIFRDKLVRAMSTKARLVNDLFG  
YKDDMRRGYVTNSINCYKKQYGVTEEEAFRKLHQMVADGDKMMNEEFLNVPHQVLKAVLDTLRAINICY

>AtTPS4

PMSYLADQLHKDSLAFRMLRMHGRDVSPRSFCWFLNQETRNHLERNIDSFLLVILSVYRATDLMPGEHDLQEAREYTRNLLEKRSI  
KEMIMHELSTPWIARLKHLDRMWIEDKNSNVLSMEKASFLRLHSSYDKLTHLAARNFEFQQAKYCRELEELTMWVKKWGLSDIG  
FGREKTTYCYFATVTSLPYEYAIKFGKLAAKTAILITIADDFDEKGSFNDLEGLTKAVLRWEGELKSYGNIIFRALDDIVRETANTCRT

---

---

HHKTDIIVHLRNIWGETFESWLREAIEWSKKGHTSSMDEYIRNGMISIAAHTIALSISCLMEPCFPHNKLKPGNYDSITLLMIIPRLND  
LQSYQKEQEQGKMNSVLLHMKNHGLEIEDSIAHIEKIIDSKRKEFLEHVLDLPKPCKEIHMSCCKVFEMFF

>AtTPS14

QFNGDLHEIALRFLLRQEGHYVQEIIKNILDKKGGFKDVVKNDVKGLTELFASELRVEGEETLDGAREFTYSRLNELCSGRESHQKE  
IMKSLAQPRHKTVRGLTSKRMIKIAGQEDPEWLQSLLRVAEIDSIRLKSQTQGEMSQTFKWWTELGLEKDVEKARSQPLKWHTWSMK  
ILQDPTLTEQRDLTKPISLVYVIDDIFDVYGELEELTIFTRVVERWDHKGLKTLPKYMRVCFEALDMITTEISMKIYKSHGWNPTYALR  
QSWASLCKAFLVEAKWFNSGYLPTTEEYMKNGVSSGVHLVMLHAYILLGEELTKEKVELIESNPGIVSSAATILRLWDDLGSADEN  
QDGTGDSYVECYLNEYGSTVDEARTHVAQKISRAWKRLNRECLPFSRSFSKACLNIARTVPLMY

>AtTPS26

EMMEDEDDLCTVSIIFWAFRRYGHYISSDVFRRFKGSNGNFKESLTGYAKGMLSLYEAAHLGTTKDYILQEALSFTSSHLESAAACGTC  
PPHLSVHIQNVLSVPQHWNMEILVPVEYIPFYEQEKDHDEILLKFAKLSFKLLQLQYIQDLKIVTKWYKELEFASKLPPYFRDNIVVNYF  
YVLAVIYTPQHSYERIMLTQYFTCLAILLDDTFDRYASLPEAISLANSLERWAPNDAMDQPDYLVNFKLTKFEVQKELEPEGRSYTV  
KATIEEFKTVTKGNFDLAKWAHAVHVPSFEEYMEVGEEISVCSTLAGIFMCMEKATKEDYEWLKSRLPKFIQTLCARCRLKNDITGFE  
DDMRGYVTNAVNCYMKQYGVTKQEAFGELNKIIVEADKILNEEFLGVRHCVLKAFTDLARMIFITY

>AtTPS6

IIDCKEDDLYTVSIIFRVFRLYGHYITPDIFNRFKGDDGNFKKCLNDDVRGMLSFYEASHFGTTTEDILEEAMSFTQKHLELFLVGEKAK  
HYPHITKLIQAALYIPQNFNLEILVAREYIDFYELETDHNEMLLKLAKLNFRFLQLQYIQDLKTLTTWWKELDLVSKIPVYFRERLAEPY  
FWATGIYYEPQYSAARIMLAKSILVDIVDNFTDVYGTIDEVKSQVQAIERWDSDAVDVLPDYLVVFRFTFDLDFKELEEVSEARSFT  
MQYAYEQLRILMKGYLQEAIEWSNRGHLPSHEEYIEVGVASTAGEVLLAMTFIPMGDAAGVGVYEWLRSRPLTHALFVKSRLRDDI  
ATYKEEMKRGDVCNGINCYTKQHKVSEEEACIEFEKKTNHMSKVMNEEFLFIPLHILRPVLNYGRLADVCY

>AtTPS32

GDEEICLDLATCALAFRLLL AHGYDVSYPDKPFAEESGFSDTLEGYVKNTFSVLELFKAAQSYPHESALKKQCCWTKQYLEMELSSW  
VKTSVRDKYLKEVEDALAFPSYASLERSDHRRKILNGSAVENTRVTKTSYRLHNICTSDILKLAVDDFNFCQSIHREEMERLDRWIVEN  
RLQELKFARQKLAYCYFSGAATLFSPELSDARISWAKGGVLTVVDDFFDVGGSKEELENLIHLVEKWDLNGVPESSEHVEIIFSVLRD  
TILETGDKAFTYQGRNVTHHIVKIWL DLLKSMLEAEWSSDKSTPSLEDY MENAYISFALGPIVLPATYLIGPPLPEKTVDSHQYNQLY  
KLVSTMGRLLNDIQGFKRESAEGKLN AVSLHMHERNRSKEVIIESMKGLAERKREELHKLVLVVPRECKE AFLKMSKVLNLFY

---

---

>AtTPS5

TTMAGENDLSTVSVMFWVSGHMDINMFRFRKGEDGKFEECHTKDVKGLLSLYEAAQLGTSTEDILDEAMSFSSSHLECLAGGTCPP  
HISRLIQNELYMPQHNAEILFASEYISFYKQEDVHNKVLLLEFAKLNFKFLQLHWIHELKILTKWWNDQDLLSKLPPYFRDRMVECH  
LYAVIYYFEPQYSFGRIMLAKLLVLLTVVDDTCDRYGSVPEVAKLLDCVERWDPPELGESLPDYLKTVFKFTLDVFEDCERAGKSEGLS  
FNVDGALAERTHLNFAEWAAAQKVPVVEEYLEVGGVAVTMYATIALGLLGLGKAREHGYEWLKSRLVHDLATKGRMLNMDMG  
GFKDDIGRGLANVVNYMKEYGTTEEETKEFHKIVRDLEKSVNSEFLGVPREILSRALNCGKMIDVTY

>AtTPS10

TNIQESDLHATALEFRLFRQHGFNVSEDFVDFVMENCGKFDREDDIYGLISLYEASYLSTKLDKNLQIFIRPFATQQLRDFVDTHSNEDF  
GSCDMVEIVVQALDMPYYWQMRRLSTRWYIDVYGRQNYKNLVVVEFAKIDFNIVQAIHQEELKNVSSWWMETGLGKQLYFARD  
RIVENYFWTIGQIQEPQYGYVRQTMKINALTTIDDIYDIYGTLEELQLFTVAFENWDINRLDELPEYMLRCFLVIYNEVNSIACEILRT  
KNINVIPFLKKSMTDVSAYLVEAKWYKSGHKPNLEEYMQNARISISSPTIFVHFYCVFSDQLSIQVLETLSSHQQNVVRCSSSVFRLA  
NDLVTSPDELARGDVCKSIQCYMSETGASEDKARSHVRQMINDLWDEMNYEKMILHHDFFMETVINLARMSQCMY

>AtTPS17

DIIAKENDLETISTMFEVFRRLRGYMPCYAFNRFRKGEDGRFKESLAEDIRGMLQLYEAAHLGTPSEDIMDEALSFTYRLESLSNHTA  
TASPHLSKHIQNALYRARYHNLEILVAREYISFYEQEEDHDETLKFAKLNFNQCQLHYIQELKDLTKWWKELDLASKLPYIRDRIIVE  
YFGALALYFEPYSLGRIIVTKITMIVTVFNDTCDAYGTLPEVTSLVDSFQRWDLGDIEKLPYVKIVFRGVFETLEEIEQEMRPQGRSRIV  
QVAVDEIKKLGKAYLAISKWARASHVPTFEEYMEFGMQTSMDFHFAAYSFIAMEDCDENQTCWEYKSRPKMMEALNGVFRIKNDIN  
TFEQEMSRGEVAKGLNCYMKQHGVSKEEAIGEMNKIYSNYYKIIMEEYLAVPRPILVRCLNVSRIPIHFY

>AtTPS18

DIIVGEDDLETISIMFEVFRLYGHKMSCDAFDRFRGEDGRFKESLAKDVRGMLQLFEVAHLGTPSEDIMDEASSFAQNHLDLSDWIGGNV  
SGATPHLLKHIQNSLYIPRYCNIEVLVAREYISYEQEEGHNKILLKFAKLNFNFCQFHYYIQELKTLTKWWKDLDLASKLPYIRDRLVES  
HLGGLGPYFEPHYSLGRIIVAKIIMTMVVDDTYDAHATVPEVAVLTECLQRLNIGADDKLPDYLRVLESVFEVMGEIEQEMRPKGR  
SYGVKQVLERFKNVAKADKQLTEWARTGDVPSFDEYMKVGLVTAGMDGYAGYCFIGMEDVSEKEAFEWLSSNPLIIQALNVMFRL  
ANDVGTYTEINRGEVANGLNCYMKQYGVTKEEASQELRKIYSNNKVVMEEFMHVPRQVLLRCLNFARLFDVMY

>AtTPS19

GIIVEEDDLETISIMFEVFRLYGHKMSCDAFDRFRGGDGRFKESLAKDVRGMLQLFEVAHLGTLSEDIMDEALRFTRNHLESLSGNSV

---

---

SASPHILKHIQNSLYIPRYCNIEVLVAREYISYYEQEEGYNEILLKFAKLNFNFCQCHYIQEIKLTKWWKDLDLASKLPYIRDRSVESH  
GGLGPYFEPQYSLGRIIVAKTIMIIVVADDTYDAHATIPEATVLT EYFQRLNIGADDKLSGYLRIVLESVFEVMGEIEQEMSPKGRS  
QVLERFKIIAKAYKQLTEWARKGHVPTFDEYMKVGLVTAGMGDYAGYCFIGMEDINEKEAFEWLNSNPLLIDALNVLFR  
IANDVGT  
YETEINRGEVANGLNCYMKQYGVTKEEASRELKMYIYNKKVVVEEFMRVPRQVLLRCLNFARLFDVIY

>AtTPS24

WKCDKEEDLHATALEFRLLRQHGFVSEDIFDVIIDKIESNTFKSDNITSITLYEASYLSTKSDTKLHKVIRPFATEQIRNFV  
DDESETYN  
IMLRMAIHALEIPYHWRMRRLRLETRWYIDAYEKKHDMNLF LAEFAKIDFNIVQTAHQEDVKYVSCWWKETGLG  
SQLHFVRDRIVENY  
FWTVGMIYEPQFGYIRRIVAIVAALITVIDDIYDIYGTPEELEFTAMVQNW DINRDELPEYMKLCFLTLFNEINAMG  
CDVLKCKNID  
VIPYFKSWADLCKAYLVEAKWYKGGYKPSVEEYMQNAWISISAPTMLIHFYCAFSGQISVQILES LVQQQD  
VVRCSATVLRRLAND  
LATSPDELARGDVLKSVQCYMHETGVSEEEARTHVQQMISHTWDEMNYETALLSRRFVETAMN LARMSQCMY

>AtTPS27

WKCDKEEDLHATSLEFRLLRQHGFVSDENIFDVIIDQIESNTFKTNNINGIISLYEASYLSTKSDTKLHKVIRPFATEQIR  
KFVDDKNI  
EYKAYHALEMPYHWRMRRLDTRWYIDAYEKKHDMNVLIEFAKIDFNIVQAAHQEDLKYVSRWWKDTCLTNQLPFVR  
DRIVENYF  
WTVGLIYEPQFGYIRRMITIVNALVTTIDDIYDIYGTLEELFTSMVENWDVNR LGELPEYMRLCFLILYNEINGIG  
CDILKYKKIDVIPY  
LKKSWADLCR TYLVEAKWYKRGYKPSLEEYMQNAWISISAPTILIHFYCVFSDQISVQNL ETL SQHRQHIVRCS  
ATVLRRLANDLGTSP  
TELARGDVLKSVQCYMHETGASEERARDHVHQMISDMWDDMNSETKSRSRGFKEAAMNLARMSQCMY

>AtTPS16

EIIAGEDDLYTISTIFWVFRTYGYNMSSDVFRRFKEENGKFKESLIEDARGMLSLYEAAHLGTTTTDYILDEALDFAS  
NNLVSLAEDGMC  
PSHLSTHIRNALSISQHWNM EIIVAVQYIRFYEQEVGHDEM LLLKFAKLNFNLVQRLYLQEVKILTKWYKDQDIH  
SKLPPYRPPVTEM  
HFFSTATFFEPQF SHARILQTKLFMAELLVDDTCDRYATFSEVESLINS LQRWAPDAMDTHPDYLVVFKFILNAFEE  
CEKELRPQGRS  
YSLEQTKEEYKRF AKSNLDLAKLAQAGNVPSFEEYMEVGKDEIGAFVIVAGSLMGMDNIDAVEAYDFLKSRSKFS  
QSSAEIVRYLNDL  
AGFEDDMRRGCVSTGLNCYMNQYGVTEVTEVFRFRKMVMNTCKIMNEEF LDVPLRVLKTNFSCVRS GFVGY

>AtTPS15

EMMANEEDLYTVSIIFWVFRRYGHYISSDFRRFKGNDGNFKKSLIGDAKGMLSFYEAAANMATT KDYILDEALSFT  
SSHLES LAANGA  
CPPHMSRRIRNALNASQHWNM EMLVAVEYISFYEKEKDHNEMLLKF SKLNFKFLQLQYLQELKVLTKWYKEVDF  
VSKLPPYFRDRIV  
ENHFFIQTLFVESQHSRARIMMAKYFILLVIQDDTLDRYASLPEAESLVNSLNRWAPDHAMDQPDYLVVFKFILDT  
FEFEKELRPEG

---



---

GSFGVCATIEEFKSLVKANLEAEKWALADNMPSEFEEYIEVTGVGITAMTTLMGAMMCMGKIVPKEDYKWLKSRPKIIQALAIKGRML  
NDMKGYKEDMSRGYAANA VTCYMKQYRVTEQEALKEFEKMOVAVANKTVNEEFLGVSRLVLK LAMGVGLMISITY

>AtTPS25

CLISDEDDLETIAIMFEVFRLYGHKMPDVDFERFKSEDGKFESLVGDVRGLLQLYEAAHLGAPSEDIMDEALS FARYHLEPLAGTETS  
SNLFKHVENVLYRARYHSIEILVARQYISFYDQEEDQDETLRFSKLNFNFCQMHYVKELKIVTRWWKELGIASKLPYSIRERNVETYL  
GGLGVLFEPYSLARIFLAKLTLIMTVVDDTCDAYATLPEVQSLHDAFHRWDLRAMEELPRYMRIIYQSVFETVEDIDREMIARGKHG  
RLQLTIDEIKSLMIWYLGIAKWARSQVPSFEDYMEIGTPSSALDDFASYGFIAMDDCDQKQLKEWFYSKPKIFHALNALFRIRNDIVT  
FEQEMSRGEVANGVNCYMKQHGVTKEEAVEELRKMERESYKIMIEEFMAMP RQILVRPVNIARVMDLFY

>AtTPS30

MIIAEEDDLETISIMFEVFRLYQHKMSCDSFVRFKGEDGRLKESLVGDVRGMLQLYQAAHLGTPSDQYIMEEAKSFTRNHLES LVESTT  
IPPHFSSHIRDALYIDRYHNMEILVARKYISFYEQEEGHDLTLLKFGKLSFNFCRLHYIQELKTLTKWWKDQDIPSNLPCVRDRIVET YF  
PTLGLYFEPFSLGRIII AKMTIIVVALNDVCDSYATYPEAKSLIDSLQRWDIEAIDELPNYSRIVLRLILETIGEIEREMKPRGRSASVQHTI  
DETKSLGRAYLALS KWASEGYMPTFDEYMEVGEVTGGMDDFALYSFIAMEDCDEKPLYEWFDSKPKILQALSVLYRINNDIVTYERE  
MSKGEVVNGVNSYMNQHGVTKEEAVEELRKMARDNYKIVMEELLDVPRPVLVRCLNLARLFDVFC

>AtTPS31

ARCSHVQDIDDTAMAFRLLRQHGYQVSADVFKNFEKEGEFFCFVQSNQAVTGMFNLYRASQLAFPREEILKNAKEFSYNYLLEKRE  
RELIDKWIIMKDLPG EIGFALEIPWYASLPRVETRFYIDQYGGENDVWIGKTLYRMPYVNNNGYLELAKQDYNNCQAQHQLEWDIF  
QKWYEENRLSEWGVRRSELLECYLLAAATIFESERSHERMVWAKSSVLVKAISSESSDSSFDQFHEYIANARRSDHNDRNDRPVQAS  
RLAGVLIGTLNQMSFDLFMSHGRDVNNLLYLSWGDWMEKWKLYGDEGE GELMVKMILMKNNDLTNFFTHTHFVRLAEIINRICLP  
RQYKARRNDEKEKTIKSM EKEMGKMVELALSESDTFRDVF LDVAKAFYFF

>AtTPS12

DITGDEKDLSTISIMFRVFRTYGHNLPSVFKRFTGDDGKFQQLTEDAKGILSLYEAAHLGTTTDYILDEALKFTSSHLKSLLAGGTCRP  
HILRLIRNTLYLPQRWNMEAVIAREYISFYEQEEDHDKMLLRLAKLNFKLLQLHYIKELKSFIKWWMELGLTSKWPSQFRERIVEAWL  
AGLMMYFEPQFSGGRVIAAKFN YLLTILDDACDHYFSIHELTRLVACVERWSPDGIDTLEDISRVSFKLMLDVDDIGKGV RSEGSYH  
LKEMLEELNTLVRANLDLVKWARGIQTAGKEAYEWRSRPRLIKSLAAKGRLMDDITDFSDMSNGFAANAINYYMKQFVTKEEAI  
LECQRMIVDINKTINEELLSVPGRVLKQALNFRLELLY

---

---

>AtTPS13

DITGDENDLSTISIMFRVFRITYGHNLPSSVFKRFTGDDGKFERSLTEDAKGILSLYEAAHLGTTTDYILDEALEFTSSHLKSLLVGGMCRP  
HILRLIRNTLYLPQRWNMEAVIAREYISFYEQEEDHDKMLLRLAKLNFKLLQLHYIKELKTFIKWWMELGLTSKWPSQFRERIVEAWL  
AGLMMYFEPQFSGGRVIAAKFNLLTILDDACDHYFSIPELTRLVDCVERWNHDGIHTLEDISRIIFKLALDVFDIGRGRVRSKGCSSY  
LKEMLEELKILVRANLDLVKWARGNQLPSFEEHVEVGGIALTTYATLMYSFVGMGEAVGKEAYEWVRSRPRLIKSLAAKGRLMDDIT  
DFESDMSGFAANAINYYMKQFVTKEEAILECQKMVVDINKIVNEELLTVPRRVLKQALNFRLLLEVLY

>AtTPS1

EMIAGEDDLYTISIMFWVFRITYGYNMSTDVFKRFGKGENEKFMESITSDVKGMVSLYEAAHLRTTREDILEEALSFTTRNLESLARAGAS  
SPHILMRIRNALCMPQHNAEMIFAREYISFYEQEEDHNKMLLRFKINFKFLQLNWIQELKTLTKWWKQDDLASKLPPYFRDRDLIEC  
YLFAIMIYFEPQFSLGRVSLAKINTVFTLVDDTCDRYGNVSEVAALVQCVERWDPDCMDSLDPYMKTVFKFAWNTFEECENAGIMEE  
GLSYDVQGALEWEQGDVPTFDEYLEIGGVEVTMYVSIACSFGLGSSREQAYKWLKSRPKFVEAQAKRARLMNDIAGFEGDMSR  
GFDVNAIMYYMKQYKVTEETFTLRLQKMARDLDTTVNEEILSVPRQILKRAIDFGKMIEFTY

>AtTPS2

EIERETQDLHATSLEFILLRQHGFVSDQAFDVFISSETGEFRKTLHSDIKGLLSLYEASYFSMDSEFKLKETRIYANKRLSEFVAESKTICR  
EDETYILEMVKRALETPYHWSIRRLERWYINVYEKKHEMNPLLEFAAIDFNMLQANHQEELKLISWWNSTGLMKQLDFVRDRIT  
ESYFWTIGIFYEPFKYCRKILTKIFMLIVIMDDIYDIYGTLEELFTNVVEKWDVNHVERLPNYMRMCFLFLYNEINQIGYDVLDRDKG  
LNVIPYLKQVWTDLFTLFTLTKESKWKYKTHKPSFEEYMQNGVISSVPTILLHLFSVLSHDISDQTLTDDSKNHSVVRSCATILRLANDLA  
TSTEEMARGDSPKSVQCYMYETRASEEEARRHMQSMISDSWDIINSDLKSLPRGFLAAAANLNRVVQCIY

>AtTPS3

IDRNRWGDLYATALEFRLLRQHGFSAQDVFDGNIGVDLDDKDIKGILSLYEASYLSTRIDTKLKESIYYTTKRLRKFVEVNKNETKSYT  
LRRMVIHALEMPYHRRVGRLEARWYIEVYGERHDMNPILLELAKLDFNFVQAIHQDELKSLSSWWSKTGLTKHLDFVRDRITEGYFS  
SVGVMYEPFAYHRQMLTKVFMILTIDDIYDIYGTLEELQLFTTIVEKWDVNRLEELPNYMKLCFLCLVNEINQIGYFVLRDKGFNVI  
PYLKESWADMCTTFLKEAKWYKSGYKPNFEEYMQNGWISSVPTILLHLFCLLSDQTLDILGSYNHSVVRSSATILRLANDLATSSEEL  
ARGDTMKSQVCHMHETGASEAESRAYIQGIIGVAWDDLNMESCRLHQGFLEAAANLGRVAQCIVY

>AtTPS7

KMMDGEDDLYTVSIIFWVFRRHGYHISYGVFQRFKGSNGNFKESLTRDAKGMLSLYEAAANLGTTKDFILEEALSFTSSHLES LAASGTC

---

---

PPHLSVRIRNALGLSQHWNMEMLVPVEFIPFYEQEIEHDEMMLLKFAKLSFKLGQLQYLQELKTLTKWYKELDFATNLPPYFRDRIVEH  
HFLVQAVFFSPQLSRERIMMIQYFTGLALLDDTFDRYASLHEAESLANSLERWAPDQAMDQPDYLRVFLNFILDTFEFEFKRELGP  
EERS  
YSVNATIEEFKAAAKANIDLEKWAQADHIPSFEYMEVGEVEVTVYASLAGIFMSMGMATKEAFEWLKSRPKLVQYLSIKGRLMNDL  
MGYEDDMSRGYVTNAVNCYMKQYGVTKEEAFRELYKIVVAANKTLNEEFLGVPHFLLKATIDLARMMTVAY

>AtTPS8

EMMAGEDNLYTISIIFLVLRTYGHMSSDIFQKFKGNDGNFKGCISGDAKGLLALYEAQLRRTTEYIMEEALSFTSSNLELLAADGRC  
PPHLSKHIRNALGLSQHKQMEVLVAVEYISFYEQEKDHDKILLKFAKLNFKLMQLHYLEELKVVTWKWYKEHDFASNLPYFKYVIVE  
NHFFAITMYFEPKFSQKRIMLAKYFTVLVLLDDTCDRYASLSEAESLNSLERWAPDDAMDQPHYLKVFVKFIMGCFEFEFERELASEGR  
SYSVKATLEEFKTIVKANFDFAKLAHTGHVPSFKEYMEVGEVEVGVCATLAGNLMCIGHIGDEGVYEWLKSRPKFLKAASYGRLM  
NDIAGFEDDMKREYVITGVNTYMKQYGLTKMEAIRELQNLVEYNHTIMNEEFLDLPRQIRKQVINVARSLNVS

>AtTPS9

KIMAGEEDLYTVSIIFWVFRRYGHYISSDVFQRFKGSNGSFKESLIGDAKGMLSLYEAHLATTKDYILDEALIFTSSHLETLVATGTCPP  
HLLARIRNALSICQHWNFVLPVDFIPFYEQEKDHDDEMMLLKFAKLSFKYLKLIYLQDLKILTKWYKKLDFPSKFPYFKDRCVENYFF  
VLPVFFEPQLSSARMLLTKGFILLGIQDDTFDRYASISEAESLGNLSLRWAPDHSMQPEYLSVLKVILDTFQEFEKELSPEGRSYSVKY  
TIEEFQASSKANVELAKWAQVSHVPSFEKYMVGQMEITACVTVAAYILMSMGKTGTKEAFEWLKSRPKLVQSLCTKGRLMNDIAGFE  
DDMSRGYVVNAVNCYMKQYGVTEKEAFKELRKMVVNTHKTLNEEFLCVSHYVLRETMDFARMIIVTY

>AtTPS21

MVRQEGCDLYTVGIIFQVFRQFGFKLSADVFEKFKDENGKFKGHLVTDAYGMLSLYEAQWGTGTHGEDIIDEALAFSRSHLEEISSRSP  
HLAIRIKNALKHPYHKGISRIETRQYISYEEEEESCDPTLLEFAKIDFNLLQILHREELACVTRWHHEMEFKSKVTYTRHRITEAYLWSL  
GTYFEPQYSQARVITTMALILFTALDDMYDAYGTMEELFTDAMDDEWLPVVPDEIPDSMKFIYNTVEFYDKLDEELEKEGRSGCGF  
HLKKSLOKTANGYMQEAKWLKDYIATFDEYKENAILSSGYALIAMTFVRMTDVAKLDAFEWLSSHPKIRVASEIISRFTDDISSYEF  
EHKREHVATGIDCYMQQFGVSKERA VEVMGNIVSDAWKDLNQELMVFPFLLMRVLNLSRVIDVFY

>AtTPS11

DLIADENKLHTISTIFRVFRTYGYMSSDVFKIFKGGDKFKESLIEDVKGMLSFYEA VHFGTTHDILDEALSFTLNHLESLATGRRASP  
PHISKLIQNALHIPQHRNIQALVAREYISFYEHEDHDETLLKLAKLNFKFLQLHYFQELKTTMWWTKLDHTSNLPPNFRERTVETW  
FAALMMYFEPQFSLGRIMSAKLYLVITFLDDACDTYGSISEVESLADCLERWDPDYMENLQGHMKTAFKFVMYLFKEYEILRSQGRS

---

---

FVLEKMIEEFKIIARKNLELVKWARGGHVPSFDEYIESGAEIGTYATIACSIMGLGEIGKKEAFEWLISRPKLVRLGAKTRLMDADIADF  
EEDMEKGYTANALNYYMNEHGVTKEEASRELEKMNGDMNKIVNEECLTMPRRILMQSVNYARSLDVLY

>AtTPS20

DMNLGEEDMYSISVIFRVFRLYRHKLSSDVFNRFKEENGDFKKCLLDDKSLTKQWASRGNTWNYFVGGSNEEHLSGHIKNVLYLSQ  
QENAEVMSREYIQFYEQETHHDETLKFAKINFKFMQLHYVQELQITIVKWWKELDLESKIPNYRVRAVECLYWAMAVYMEPQYS  
VARIILSKSLVLWTIIDDLYDAYCTLPEAIAFTENMERWETDAIDMPDHMKVLLRSLIDLMEDFKGEVRSEGRLYSVEYGIDEWKRLFR  
ADLTISKWARTGYIPNYDEYMEVGIVTGGVDVTVAFAFIGMGAEAGKEAFDWIRSRPKFIQTIDLKSRLRDDVATYKDEMARGEIATGI  
NCYMKQYKVTEEEAFLEFHRRRIKHTSKLVNEEYFTVPLKLVRIAFNVGRVIDTNY

---

*Dendrobium officinale* >DoTPS34

NNSNEENLNGSALLFRLREHGINNASMLRVNALISCFKKEREKLNQNDHNVKGMLSLYEASYLAVEGEEELAAAGKLAMEHLK  
CIDGSLFTQQFIEEIDHALELPLHWRMSRLHTRWFIDAYGRRENFNPTLLELAKLDFNMVQSIYKAELQELSMWWRNLGLVCEELDF  
VRDRLVENYLISLGITFQPNFARCRKAITKIISLVTIIDDYDIYGTLDLKLFTNTIEEWKIDTSQQLPDYMKMCWIAIFNTMNDIATSFS  
MEKALDILPCLKRVWDLCKSQLLEAKWYHNGYTPTLDEYLENAWVSTSGHCELTAAYCLSDDLTIESLNSLEFYPPPIRYSCILFRLY  
DDLQTSKEEMKRGDVPKSIQCYMKEKNVSESIARDYIKCLITTYWKKLNQECTTISKLWEPFRNALVGFPRTAQCFY

>DoTPS19

SNIKNNLHYSSLLFRLREYNIKVPNQSEDFVRSFKNESGRFNINIMNDVKGMLSLYEASYLAVQGEDDLDDAVEFTTKHLSNYLKE  
PLLINPLLVEEISHALELPLHWRMSRLHTMWFIDAYERQENMNPYLLEFAKLDNFIVQTIYKELKEISRWWRSIGLVGDDFSFARDRL  
METYLWSVGCAFEPFRWRCRKEITKLGCLITTIDDIYDVYGSLEELVFFTNVDEWKIAESQHVSTCMKTVLLALFNTVNDIARTISTEK  
GIDILPHLKRLWGDLCYSYLMEAIWYYIGYIPTINEYMQNAWLSISAPLILTSAYCLSEDLTIEALNSLELYIDATLHSSMITRLYDDLGTS  
TVRTIMLLYNIYIYI

>DoTPS28

NNLIENNNLHDFALLFRLVREHDIHNASILRLDDLISCFKNEEESFNQNNQLDVKGMLNLYEASFLAMEGEDELDEAGKFAMKHLK  
YHDRSLLSPQLVEQIEHALELPLHWRMSRLHTRWFIDAYGRHKNFNPTLLEFAKLDNFNMVQSIYKTELQELSRWWRNINVVRRGLN  
FVRDRLVENYLWAIGFTFQPELWRIRKAMTQIISFITIIDDYDIYGTLDLKLFTNAIEAWNIATTQQLPGYMKKCLTTLFNTMDDIAS  
SFSKEKELDILPCLKRMWADLCKAYFIEAMWYHNGYTPTLDEYLDNAWVTISGICVLTATYCLSDDLTFEAIKSLEFYPPPIVRYSCMLL  
RLYDDLGTCTEEIQRGDVPKSIQCYMKEKNVSETTARDYIRCLRNYWKKLNKEHVISSKYVESFRKVLFDIPRTAQCFY

---

---

>DoTPS10

HNLIKNNNLYGSALLFRLREHGINNAAILRVDTLISCFKQVRESFNPNHQYDVKEMLSLYEASYLAMEGEEELDEAGKFAMEHLRR  
LDRSLLSPQLIEEIDHALELPLHWRMPRLHSRWFIDAYGKQENVNPILLELAKLDFNIVQSIYMTELKEISNWWRN LGVLCDELDFIRD  
RLVENHLWALGFTFQPKFWRSRKAITKINCLVTTIDDVYDVYGTLDLEIFTNAVEDWKMDAAQQLPNCMKICLMALFNTMNEVA  
YSFLKEKELDILPCLKRVWVDLCKAYLIEARWYHNRYTPTLDEYLENAWVTISGNCGLSASYCLSDDLNVEALDSIKFYPPIVQHSCMI  
FRLYNDLGTDMAEIQRGDVLSIQCYMNEKNVSDSAARDYIRCLIRNYWKKLNGEYITFSTSIESFRKALVDVPRTAQSFY

>DoTPS21

NNLIKNNNLYGSALLFRLREHGINNGAILRVDTLMSCFKQVRESFNPNHQYDVKELLSLYEASYLAMEGEEELDEAGKFAMEHLRR  
LDRSLLSPQLIEEIDHALELPLHWRMPRLHSRWFIDAYGKQENVNPILLDLAKLDFNIVQSIYMTELKEISNWWRN LGVLCDELDFIRD  
RLVENHLWALGFTFQPKFWRSRKAITKINSLVTTIDDVYDVYGTLDLEIFTNAVEDWKMDAAQQLPNCMKICLMALFNTMNDIAY  
SFLKEKGLDILPCLKRVWVDLCKAYLIEARWYHNRYTPTLDEYLENAWVTISGICELSASYCLSDDLNVEALDSINFYPPIVQHSCMIFR  
LYNDLGTDMAEIQRGDVLSIQCYMNEKNVSDSAARDNIRCLIRNYWKKLNGEYMTFSTSIESFRKALVDVPRTAQSFY

>DoTPS27

RMEFNGDVYAMALYFRLSRQHGFESKDLLVKSYPKESGCFKPSVFDNIKGMLSLYEASFLAMDGEEIIDDAKEFALKHLNDFMRSN  
SSTNPLLAQHIAAMALELPLHHRIPKFSQMFIEHSRHIKEINVDSIVLELGQLEFNMTQSIYKRELKEISKWWAEVSNVFD SKLNFARD  
WPVESYFLAVGMAVEPQFSTYRKELAKALCFINVIDDIYDIYGLLDELQLFTNAVDRWEFASIKSLPEYMKICLEGLFNMVNSLASKIK  
EEKGLDVLPNLKRAWLDLCKAYMVEARWCHTGYCPTFEYLDNAWISVSTPLLSVISHCLSENLTKLSLESFDFYPTIVRQSSIIFRLYN  
DLGTSKGELQRGDVSKSIQCYMKENHVSELVAQECIRNIINKNWKELNREWIKGSIYDETFKTVAINIPRAGHLMY

>DoTPS2

RMEFTEDVNFKALYFRLSRERGFVSKDLLVKSYPKDEKGCFCPCVFHDIKGLLSLYEASFLSMDGEDEIDEAKEFALKHLNDCMRSNS  
LTNPALAKHIALALELPLHHRIQKLQAPMFIEHARNMKELDVPILLEFAQLDFNMTQNIYNKELKEITRWWTKISNLAGGELSFAR  
WPVESYFLAVGVAMEPRFSTCRKEFAKAICFINVDDIYDIYGLSDELQLFTDAIERWDFSTSKSLPEYMKICLSELFNTMNSLACKIME  
EKGLNILPYLKRAWLDLCKAYMVEVRWYNGYCPTFAEYLDNAWISVAAPLGSVMTLCLSENLTNLSLEGDFYPSIIRQSSIIFRLYN  
DLGTSKGELRRGDVSKSLQCYMKEKHVSELEAQKCMKSIINKCWKELNREWIKASRYEETFKMVAINLPRVAHLFY

>DoTPS3

RMEFTEDVHVMALYFRLSREHGFEVSKDLLVKSYPKDEKGCFCPCVFHDIKGLLSLYEASFLSMEGEDEIDEAKEFALKHLNDCMRSNS

---

---

STNLILAKHIALALELPLHHRIQKLQAPMFIEHARNMKELDVDPILLEFAQLDFNMTQSIYNRELKEITRWWTKISNLAGGELSFARE  
WPLESYFLAICLAMEPRFSTCRKEFAKAVCFINVVDDIYDIYGSDELQHFDTDAVEMWDFATSKSLPKYMKICLSELFNTVNNLACKI  
MEDKGLDILPYLKRAWLDLCKAYMVEATWYYIGYCPTFDEYLDNAWISVAAPLTSVMALCLSENLTNLSLESFDFYPSIIRQSSIIIFRLC  
NDLGTSKGELRRGDVSKSIQCYMKEKHVSESEAQKCIRTIIDKCWKDLNNEWMEASKYEETFKMVVINLPRVAHLFY

>DoTPS24

RMEFTEDVHVMALYFRLSREHGFEVSKDLLVKSYPKDEKGFYVYVFDIKGLLSLYEASFLSMDGEDEIDEAKEFALKHLNDCMRSNS  
TTNPLLAKHIALALELPLHHRIQKLQAPMFIEHARNMKELDVDPILFEFAQLDFNMTQSIYNRELKEITRWAKISNLAGGELSFARE  
WPLESYFLAVGLAIEPYFSTCRKEFAKAICFINVIDDIYDIYGSDELQHFDTDAVERWDFATSKSLPQYMKICLSELFNTVNSLACKIMK  
DKGLDILPYLKRAVKLLKLLKIFKVLFL

>DoTPS20

SNILKNSLHGSALLFRLREYGICALNTREDFLVRFSKNENGSKVHVIVNDVKGMLSLYEASYSVEGEDDLDEAMEFTTKHLSNYLKE  
PSLIHPSLVEQISHALHLPLHWRMPTLHTMWFIDTYEKQENTNYSLEFAKLDNFMVQSIYKKEVKEMSSWRSIGLAGDEFSFARDR  
LMENYFWAMGCALEPHFWRCRKEITKLVSIITTIDDIYDYGSIIEELVFTNAVDEWKIIEIQSLPNCMRKALLTLINTMNEIAFAFSKE  
KGLDILPQLKRPWGYQCKAYLVEAIWYNTYIPTLNEYMENAWLSIGTALVLTVAAYLLEDLTKEALNSLELYFDVTRYSCMITRLYD  
DLGTSKDELQRGDVPSIQCYMNETNVLEFVARDHIRQLIKKYWKLLNGEYFSNFNLEESFKRYALNLPRMTQCIY

>DoTPS1

CKEVILCGLRSTAICFQLLRRFGFQISEGIFDDFMDGDHNAFLPTLSDDVIGLLSLYNASYMAFPGENKMESARSAVKHMNRENMQE  
ILPGSIESAIGHALDPLHRRMPWMEARMYIDMYELEDMDSPPLLHLAKIHFNKVQSIHQKELKHAGSWWRRLDLGKTINFSRDRML  
ECFFYVVGIVHHPDYGFCREKLTQVGRSGHRPGRSVQIKEDRPEHRPGCKTGRLKIGLIVQADLTILADHFKSEK

>DoTPS33

YKEVILCGLRSTAICFQLLRRFGFQISEGIFDDFMDGDHNTFLPTLSDDLIGLLSLYNASYMAFPGEKMKMESARSAFKNMTRKNMQEI  
LPGSIESAIGHALDPLHRRMPWMEARMYIDMYELEDGMSPALLHLAKIHFNKVQSIHQKELKHAGSWWTRLDLGTISFSRDRML  
ECFFYVVGIVHHPDYGFCREKLTQVGMLIATIDDVYDVGSLLELELFTQIIDRWDIKGVVELPYMKICFSALNDTINGVANHLYAD  
DRFNILQWADLFKSFLVEAKWHKGYIPTLKEYLSNASISAAGHVILFLAYILLKCKITKETLQLLQDFPNIIRLPSLIFRLCNDLATSSNI  
QVEQERGDVATSVQCYMKETGASEEEARLYISMLISDAWDMNEEYSTCSKPQFPQRFIDASINLARMASFMY

>DoTPS25

---

---

NNLIENNNLQDFALLFRLVREHGIHNASILRLDDLISYFKKEEESFNLNNQLDVKGMLNLYEASFLAMEGEDELDEAGKIAMKHLKY  
HDRSLLSLQLVEQIEHALELPLHWRMSRLHTRWFIDAYGRQKNFNPTLLQFAKLDFNMVQNIYKIELQELSSWWRNLNVVRGELNF  
ARDRLVENYLWTVGYTFQPELWRSRKALTKINSLVTTMDDIYDIYGTLEELKLFTNSIEEWNIDAAQQLPDYMKKCLTVLFNTMNDI  
ASSFSKDKELDILPCLKRMWADLCKAYFIEAMWYHNGYTPTLDEYLDNAWVTISGICTLITTYCLSDDLTFEAIKSLEFYPPIVQYSSML  
ARLYNDLGTCTAEIQRGDVPKSIQCYVKEKNVSESAARDYIRCLIRNYWKLNKEHALSSNYVKSFRKVLVDIPRAAQCFY

>DoTPS30

NNSIEENNLHGSALLFRLREQGIKNAVNALISCFKKERENFNQNHEHIVKGMLSLYEASYLAVEGEEELEKAGKLAMDHLKCIDRS  
LFTQQFIEEIDHALELPLHWRMSRLHTRWFIDAYGRRENFNPTLLELAKLDFNMVQGIYKVELQELSMWWRNGLVCEELDFVRDRL  
VENYLMSIGTTFQPNFGRLRKALTKIICFVTTIDDIYDIYGTLDLKLFTNTIEEWKIDASQQLPDCMKICSAILSTMNDIATSFSMEKAL  
DILPCLKRAWVDFFKSQLLEAKWYHNGYTPTLDEYLENAWVSISGNIGLTAAYCLSDDLTIESLNSLEFYPHFIRYSCTIVRLYDDLQTS  
TAEIKRGDVPKSIQCYMKEKNVSESVARDYIKCLIRIYWKLNQECATISTLWEPFRNDLYGCPRAAQCFY

>DoTPS23

SNILKNSLHGSALLFRLREYGIKALNTREDFLVRSFKNENGsfkvHIVNDVKGMLSLYEASYSVEGEDDLDEAMEFTTKHLSNYLKE  
PLLIHPSLVEQISHALELPLHWRMPRLHTRWFIDAYERQENMNHSLLEFAKLDFNMVQSICKKEVKEMSSWRSIGLAGDEFsfARD  
RLMENYFWTMGCTFEPHFWRRCRKEITKLASLITTIDDIYDIYGSVEELMLFTNAVNEWKITEIQSLPNCMRKALLAIINTMNDTACAFS  
KEKGLDILPQLKQAWGDQCKAYLVEAIWYNTRYIPTLNEYMENAWLSVAISLVINAAYLLEDLTKALNSLEFYFDVTRYSSMVTRL  
YDDLGTSTDELQRGDVPKSIQCYMNETNVSEFVARDHIRQLIKKYWRLFNGEYFSNFNLEESFKRYALNLPMAQCIY

>DoTPS18

SNILKNSLHGSALLFRLREYGIKALNTSEDFLVRSFKNENGsfkvHIVNDVKGMLSLYEASYSVEGEDDLDEAMEFTIKHLSNYLKE  
PLLIHPSLVKQISHAIELPLHWRSPRLHTRWFIDAYERQENMNPSLLEFAKLDFNMVQSICKKEVKEMSSWRRSIGLASDEFsfARDRL  
MENYFWIMGCTFEPHFWRRCRKEITKFASLISTIDDIYDIYGSVEELVLFTNAVDEWKIIEIQSLPNCMKTTLLALINTMNDIACAFLKEK  
GLDILPQLKRAWGDQCKAYLVEAIWYNTRYPTLNEYMDNAWLSAAVPLVLTAAYLLEDLTKQALNSLQFYFDVTRYSSMVARLY  
DDLETSTDELQRGDVPKSIQCYMNETNVLESVARDHIRQLIKKYWKLLNGEYFSNFNLEESFKRYALNLPMAQCIY

---

*Oryza sativa*

>Os01g23530

NDKDLNLVSLRFYLLRKNGYNMSSGIFLSFKDNEGfIVDDTRSLNLYNAANLRVYGEKVLDEAATFTISRLEGVLESSDSILSEVSFA  
LEAPIFRRARIVEMRNYIPIYEIEATRNETILEFAKLNFNLLQLLYCEELNKITLWWKELKVKSNLSFSRDRIVEMYFWMNGALYEPHYS

---

---

HSRIILTRVTAFMTHIIDDFDITYGTTEESMLLAEAINRWDESAIGLPEYIRGFYAYLLKTFDSFEEELGPEKRYRLKRLVQAYTKELKWRD  
EDYTPKTL EEHFVSMRSSGGFTLAAASFVGMDDIATKDIFEWILSYPSLFTFDIFVRLSNDIVSNKREQTGDHYASTIQCYMKEHGTT  
IHETYQRLRELIEDSWKDMVEHCTDQPLIVPQTVVNFARTVTTMY

>Os01g42610

YSSNLHEVALRFRLRQQGYWVSPDEFNKFKCEDGSFKSDINNDPKGLLSLYHAAYLLTHNERALKEAILFATHHLELLSGSLEFPLAE  
QVKRALQIPLPRTLKRVEALNFIFEWWKDVSSDINLDYTRDRVVECYFCAYIVYYEKEYARARMMLAKKIMLISLLDDTYDVHATLEE  
ARKFNEALQRWDKNAVSLVPEGLKRFFLSIMSNFRDFEDELPEHEKYRNAYNIAFQILSNNYLQEAWFHQKYIPSFTEHATVSLVT  
GGAIELPVSIIVGMGDIATKDAFDWALSADAGRAFGEVSRFMDDLAVSQNGREKMDVANAVECYMKEHGVTSDVAEAEISEMVE  
GAWRTLNQARFVYLPFVQRIANVSMSIALLF

>Os02g02930

AHGGDLLDATLAFRLMREAGHHVSADEVGRFTDDNGEFLDYRKDIRGLLSLQDISHMNIGQEASLCKAKEFSTRNLESAINYLEPN  
LARYVRQSLDHPYHVSLNQYKARHLSYLQTLPIRCTAMEELALADFLNKLHQMOMQEIKRWWMDLGLAQEIPVARDQVQKW  
FVWMMTAIQGASLRCRIELTKIVSFVYIVDDIFDLVGTREELSCFTQAIMWDLAAADSLPSCMRSCFRALHTVTNDIADMVEREHG  
VNPINHLKKAWAMLFDGFMETKWL SAGQVPDSEYLRNGVVTSGVPLVFVHLLFMLGHDVSNAAEFVDHIPPVISCAPAKILRLW  
DDLGSAKDEAQEGLDGSYKELYLKENGLAAGEAEEHVRRLIAGEWEELNRECFTFPAGFTAALNAARMVGVMY

>Os02g17780

ARNSNVKEVDDTAMAFRLRLHGYNVSPSVFKNFEKDGEFFCFVGQSTQAVTGMYNLNRASQISFPGEDILQRARNFSYEFLREREA  
QGLHDKWIISKDLPGEVQYTLDFPWAYSLPRVEARTYIGQYGGNDDVWIGKTLYRMPVNNATYLELAKQDFNRCQALHQHELQG  
LQKWFIEANGLEAFGMTPEDVLRA YFLAAACIFEPNRASERLAWARVSVLANTISRHFDMSSMKRMERFMWSSEENGLGGYAGILA  
RTLCQLIDLLSQETPPVREGQKCIHNLIRCAWIEWMMQINMKDGRYDKGRVMHPGSCTVHNKETCLLIAQIVEICAGREMINNTE  
GSWFIQLASSICDSLHAKMLLSQDKKNETTINQIDKEIELGMQELAQYLLVDDRRINNKQTFLSIVKSCYY

>Os02g36140

KDEEIMLDVTTCAMAFRLRMNGYDVSSDEL SHVAGASGFRDSLQGYLNDRKS VLEVYKTSKHSISENDLILDSIGSWSGSLLKEMLC  
SNGKGTGREIEFALKYPFYSTLERLVHRKNIVLFDKAGSQMLKTECMPVHDSQDFLALAVDDFCISQSNYQNELNYLESWVKDNR  
LDQLHFARQKITYCYLSGAATFRPEMGYARTSWARTAWLTAVIDDLFDVGGLEQEENLLALMEKWEPEGEDEYSEDVKIVFQAL  
YNTVNEIGAKASALQGHVTKYLVDVWLHVVRCKMVEAEWQRSQHLPTFEEYMESGMVSLGQGCTVMSALFLIGEKLEPEGIVELEE

---



---

YDELFRMLMGTCGRLLNDIRGIEREESDGKMTNGVSLLVHASGMSVDEAKTEVMKRIDASRRKLLSLVVPPIRPRCKQLFWKMCKILHLF  
Y

>Os02g36210

GGLCPVKDIDDTAMAFRLRLHGYNVSSVFNHFEEKDGEYFCFAGQSSQSLTAMYN SYRASQIVFPGDDDGLEQLRAYCRAFLEERR  
ATGLMDKWVIANGLPSEVEYALDFPWKASLPRVETRVYLEQYGASEDAWIGKGLYRMTLVNNDLYLEAAKADFTNFQRLSRLEWLS  
LKRWYIRNNLQAHGVTEQSVLRAYFLAAANIFEPNRAAERL GWARTAILAEAIASHLRQYSANGAADGMTERLIDWDWESKDSAA  
RSLLYALDELIDLHAFGNASDSLREAWKQWLMSWTNESQGSTGGDTALLVRTIEICSGHGSAEQSLKNSADYARLEQIASSMCSKL  
AKILAQNGGSMNDVNGIDQEVDMKELIQRVYGSSSNDSVTFLDVVKSFCYV

>Os02g36220

NEEELMLDMGTCAMAFRLLRMHGYDISSDGMAQFVEQSSFDDSIHGYNLNDTKALLELYRSSQIRCLEDDLILQDIGSWSARVLQEKIS  
SKMTHKSEMLEVEYALKFPVYATLERLEQKRNIQFKTKEQLKIEGFKLLKSGYRGAITHDEILALAVDEFHSSQS SVYQQELQDLNSW  
VAQTRLDELKFARLMP SITYFSAAATMFPELSEARIAWTQNCILTTTVDDFFDGDGSKEEMENLVK LIEKWGDHGEIGSSECVEILFY  
AIYNTSKQIAEKAVPLQKRNVVDHIAESWWFTVRGMLTEAEWRMDKYVPTTVEEYMSAAVDSFALGPTITSAALFVGP ELSSEEVFRS  
KEYIHLMNLAN TIGRLLNDMQTYEKEIKMGKVN S VMLHALRGSEASMEEAKREMRRVLQGSRCDLLRLVT VVPPPCRKLFWFMSK  
VLHFVY

>Os02g36264

NEEELMLDMR TCAMAFRLLRMHGYDITSDGMAQFVEQSSFDDSIHGYNLNDTKALLELYKSSQLRCLEDDLILEEIGSWSARV LLEKISS  
KMIHISELPEVEYALKCPVYAILERLEQKRNIQFKTKEQLKIEGFKLLKSGYRGVIPNDEILALAVDEFHSSQS SVYQQELQDLNSWVAH  
TRLDELKFARLMP SITYFSAAAVLLPSESARIAWTQNCILTTTVDDFFDGEKSKEEMENLVK LIEKWDDHGEIGSSECVEILFYAVYNTS  
KQIAEKAMPLQKRNAV D HIAESWWFTVRGMLTEAEWRMDKYVPTTVEEYMSAAVDSFAVGPIITSAALFVGP ELSSEEVFRSEEYIHL  
MNLANTIGRLLNDMQTYEKEIKMGKVN S VMLHALRGSEASMEEAKREMRRVLQGRFELLRLVT VVPPPCRKLFWLMSKVLHFVY

>Os03g22634

PSLHDVALRFRLRQQGLWVSSDVFNKFKHRDGSFIIDITNDPKGLLSLYNAANLLTHNEEALQEAILFSRHHELMKSNLKSPLAEQ  
VSRALQIPLSRNLKRVEALSYLEYNVHEQTYNPSILELAKLDFNLLQHIHQRELKTITQWWEDLSNDIGLDYIRDRIVECYFWSYSMYF  
EEEYTRARMILAKFFMLTSLDDTYDTHATLEECRNLNVAIQSWDES DISVLPDYLLKFFLKVMSNFVEFENELEPHIRHRNAYNRKV  
FQLLSGYLLQEA EWFHHNYVPSFKEQIEVSVMSAVTEETLEWAIGNND AVRAGGEVARFMDDMAAFKNGRNKLDVASSVECYIKE

---

---

YNVTSEVALAKIGSLVEDAWKTINQAHIRELLPFVHRVTNLSRSMALF

>Os03g24640

DFAGSDDDLTYVALRFLLRQHGVWVSACVRDKFRDGTCSFSSSLRDDPRGLLSLYNAAHMAAPVEIALDDIIAFARCHLEALSMEG  
ELKSPLAEQVSRAPDIPLPRFRRLETMSYLVEYEQEDEHDDMLELARLEFELTRCLHLEELKALSLLWWRELYESVKLSYARDRLVES  
YFWTCGVFHEEEYSRARIMFAKVFGLLSLMDDTYDVHATLEECYKLNIAIQRWDEGAISILPEYLRMFYIKLLSNFDELEASLEPHEKF  
RVSYAKNAFKLSSEYYLREAKWSNTKYTPSFAEHLEVSVMSSGFPMLAPVVLVGMVHDVATAAAFEWATGVPDVVIAASGEVARFLN  
DIASHRVGKNEKDVPSSVESYMAEHGVGEEAALAAVAAMAHEGWRTINRALMEMDPGLLPAIVNLTRTLEVIY

>Os03g24680

GSDVADDDLHVTSRFRLLRQHGLGISADVFDKFRDNGGSFRASLSSDTRGLLSLYNAAHLAMPGEEVLDDAIAFSRRHLRSMKTAG  
KLRSPMAEQVSRALDIPLPRTPRRLEAMRYIHEYGDEPGFDGVLELARLDFELVKSLHLRELKATLWWKDFYDNVKLSYTRDRIAE  
VFFWVSGVYEEKYSRARIMLAKVFLITLMDDTYDVQDTLDECCRFNETIQRWNGAVSILPEYMHAYYIKLLSNFDEMENSLEPN  
EKHRVSYAITMYKQLSEYYLQEARWSSHRYLPSFAEHLYVSSISSGIPALAPAVLMGVHDVATKEALEWACAIPDLLASGEEGRASL  
VETYMTEHGAGDAVAVAASERAWRRINRACVAVEPALLPALVNLSTMEVY

>Os03g24690

AGFDDGDQLYLESRFRLLRQHGFVWSADVFDKFKDSTGCFRESLSTDARGLLSYNAAHLAMPGEAALDDAIAFSRRSLQSLQAL  
RSPMAKQVSRALDIPLPRAPKLETMHYITEYEQEAHDMVLELARLDFELVRSYLKELKALSLLWRQLYDSVQLSYARDCLVES  
YFWTCAMFHGEDYSRARIIFAKVFLMTMTDDIYDIHATLEECYKFNEAVQRWDKSAVSILPEYLRNFYIRILNDFDEMEDSLEPDEK  
HRMSYVKSSFQQSEYYLREAWSSDKHMPSFAEHLVDFMSIGYPTMAVVVLLCARDAASMEASEWAPSLVRAGGEVTRFLNDIA  
SYKTGKSGKDAASTIECYMAERGVGEEAVAVAALVESAWRTINRACVEMDPNLLPALVNLATTPEVIY

>Os03g31430

ANDDFHAIQLFRLLRQRRYMPCDAFKEFIDKQGNLNGTLCSDTRALLALYEAHLGTPNEEILREAVETTNQLKRIVDCIEKPLS  
NKVRHALETFSFRMKRLEARLYIPLYEEDKEECNEMILELAKLDFYLLQRLHREEVKEICEWYHGLESPRELFYARHRPAEAYFWAL  
GVYYEPEYAKPRKLLAKFIATITPYDDTFDNYGLWKELQPFADVMQRWDEKGAEQLGRCYKEYAQFMFGTMNEIEGALPKGTPRKN  
VNVIKDIITEVCKGYVTEIDWRDSKYIPPLKEHLQITLVTCFYWAINCTAFVVFQEGVTEEVMIWMSGFPQIVKDCIVSRLMDDIVAH  
AFETERNNVATAVTCYMKEYDSTKEEAIKALWNDVENAWKDMNEEYLSIPSSLLIQVSIMNNRVSKLAS

>Os04g09900

---

---

TKNCPVKDIDDTAMGFRLRLRYGYQVDPCVKKFEKDGKFFCLHGESNPSVTPMYNTYRASQLKFPDGDGVLGRAEVFCRSFLQDRR  
GSNMKDKWAIKADIPGEVEYAMDYPWKASLPRIETRLYLQYGGSGDVWIGKVLHRMTLFCNDLYLKAADFSNFQKECRVELN  
GLRRWYLRNLEKFGGTDPTLMTSYFLASANIFEANRAAERLGWARVALLADAVSSHFRNSTSNEELISLVPFDDAYSGLSREAWK  
QWLMAWTAKESSQESIEGDTAILLVRAIEIFGGRVLTGQRPDLEWYSQLEQLTSSICCKLSRVLAQENGESTEKVEEIDQQVDLEMQEL  
TRRVLQGCRAINRLTRETFLHVVKSFYV

>Os04g10060

RDEEVMLDLPTCAMAFLRLRMNGYGVSSDDLHVAEASTFHNSVEGYLDDTKSLELYKASKVSLSENEPILEKMGCSGSLLEKEL  
CSDDIRGTPILREVEYALKFPFYATLEPLDHKWNIEFDARAYQKIKTKNMPCHVNEDLLALAAEDFSFCQSTYQNEIQHLESWEKEN  
KLDQLEFTRKNLINSYLSAAATISPYELSDARIACAKSIALTLVADDFDVGSSKEEQENLISLVEKWDQYHKVEYSENVKAVFFALYST  
VNQLGAMASAVQNRDVTKYNVESWLDYLRSLATDAEWQRSKYVPTMEEYMKNSIVTFALGPTILIALYFMGQNLWEDIVKNAEYD  
ELFRLMNTCGRLQNDIQSFERECKDGKLNVSLLVLDSDMSVEEAKEAINESISSCRRELLRLVVPKSKCKEMFWNLYKTSHVY

>Os04g26960

TSSNLHEVALRFRLRERGFVWSPDIFNFKFGDDGNFLNEFAEDPRSLLSLYNAAHLFIHGEPLEEAISFARNHLESMSHSLVKAPL  
ADQVKRHLRPLPRTHKRVEMLHYMFEYDQENEHNPVLELAKLDFNLLQQVHLKELKEISRWWKDVLAYMGLDHIRDRVIECYT  
WSYAVYHEKDLALARMIFAKLVALTSVLDDTYDVHASIEECRMLNVAIQGWDDSAALLVPEYLRKFYEIILRTFREFEDQIPRNQRYL  
AAFSKAEFQKLTSNYLEAAEWYHRNHKPSFNDQVALGTATTGTRSLAAGLMLGMGDATTKQAFQWAVTSTDAIISCGKIGRLMND  
ISGFKLGQNKADMACAVEAYIEEHKVTADVAIARINEVLEDEWKTNTQARVAVLPVVQRMTLGIQLFY

>Os04g27070

ASSKLHEVALRFRLREHGFVWSPDVFNFKFGDHGTFNNELSLADDPRGLLSLYNAAHLFIHGEPPELVEAISFARHHLESFNRRNVLK  
APLADQVKRALHLPLPRTHRRVEMVSYMFEYGREDDGHNPVILELAKLDFNLLQRVHLKELKEISRWWKDVSGYMGINHIRDRVIEC  
YTWSYAVYHEEEMSFARMLFAKIVVIALLDITYDVHGSIQECRMLNAAIQGWDDSAVLLVPEYLRKFYEFILRCFREFEDQVPSNQK  
YLIAFSKTELQRLSSYLEGAEWSHRKHMPSEQVALATMTTGTRPLAAGLVMGMSEMTTKQAYEAVNSTDAIISCGKTGRFMN  
DIAGFKLGQNKADMPCSVESYINEHKVTADVAIAKINELVEDEWKTNTQARILPVPVQRRLINITMAIPLY

>Os04g27190

TSSSLHEVALHFRLREHGIWVSPDVFEKFKGEDGRFINTIADEPRALLSLYNAAHLLVHDEPELEEAMSFARHHLESMRDGSRLKAP  
LDNQINRALHLPLPRTYKRVEMLHYMLEYQEEECIVVLLDLAKLEFNLLQHVHLKELKAFSQWWKDLYGYVELSHVRDRAVESYL

---

---

WSYALFYEENLTLTRMILAKIIVFIVLMDDTYDDHATIEECRKLNEAIQRWDESAISLLPEYMKKFYRALLNYFRETEAQVEASDKYRV  
TCMKKEFQNLSTYYLQEFEWLHQNYKPAFKERVALSTLSSTVPLLCVTA AVGQGD AVTKESFELTTVRSSAVIACAKIMRFMNDIAAF  
KSGKNKGDAANTVECYINEHKVTSEVALDKIESMIESEWRTL NQVQKQFHVVQRVMNLAVAVPFFY

>Os04g27340

TSSSLHEVALHFRLREHGIWVSPDVFEKFKGEDGRFINTIADEPRALLSLYNA AHLLVHDEPELEEAMSFARHHLES MRDGSRLKAP  
LDNQINRALHPLPRTYKRVEMLHYMLEYGQEEECIVVLLDLAKLEFNLLQHVHLKELKAFSQWWKDLYGYVELSHVRDRAVESYL  
WSYALFYEENLTLTRMILAKIIVFIVLMDDTYDDHATIEECRKLNEAIQRWDESAISLLPEYMKKFYRALQNYFRETEAQVEASDKYRV  
TCMKKEFQNLSTYYLQEFEWLHQNYKPAFKERVALSTLSSTVPLLCVTA AVGQGD AVTKESFELTTVRSSAVIACAKIMRFMNDIAAF  
KSGKNKGDAANTVECYMNENKVTSEVALDKIESMIESEWRTL NQVHQQFPVVQRLLNLAVSV PFFY

>Os04g27400

ISSSLHDVALRFLLRQHGFHVSPDVFNKFKGDDGRFVSGITNDPRGLLSLYNA AHLLTHDEPELEE AISFATQH LASLSSGTDLNP HL  
IDQINRALDVPLPRTYRRMETLCYMPYRQEEGHIPILLELAMLDFNLLQHVHLKELKAISEWWKDLYGYMGLSYIRDRV VESYVWSY  
VVFYEEDSALARMIFTKIIAFIILMDDTYDSYATIQCERKLNEAIQRWDESATALPEYIKKFYSALLKTFKEFEIHVEDDGQYRIDHTKKA  
FQNLSAYYLQEA EWSYQNYKPSFEEQVALSTVTSTVPLLCVSTTVGRGDALTNEA FEWAANDIGAKIACAKITRFMNDIAAFQ RQGN  
RGDVVSTVECYMNENKVTSEGAFTKIDLMIEDEWRTINQALCLPAVQQVLNLAICATFFY

>Os04g27540

TSSSLHEVALRFHLLREHGLWVSPDVFNKFKADDGKFIDEHNDLKQPLFDKFSRALHPLPRTYKRVETLHYFLEYGQEEGHIPILLDL  
TKLDFNILQRVHLKELKAISEWWKDLKYI GLTYISDRAVESYIWSHTMLFG EGLALTRMICAKI ILLVIMDDTYDAHATIEESRKLNE  
AIQRWDESAIPRVPEYLK KFYIKLLNNFKEIEDQVMDNEKYKVAYAKKEFQKLSHYLQEV EWLHQNHKPSFQE QVDLSTKTSTAHL  
MFVSTTVGLGDAVTK EALEWAESSTAIVAVGKIMRFMNDIAAFKHGKNKGDVTSTMECYMNEHKVISDVAFMKLTS LIEHEYRTIN  
QAELSLPAAQRVVVVSLMFFY

>Os04g27720

TSSSLYEVALRFLLREHGFVPPDAFNKFKGDDGRFRNEIANDPRGLLSLYNA AHLLIHGEPELEEAITFAREHLK LMSQDNV LNPP  
LACQVRRALTLPLPRTFKR VETICYMLEYQLEEGNIPILLDLARLDFNLLQHIHLKELKAISEWWKDLYGYMGLSYIRDR TIEGYTWSY  
MMFYEEGFAFTRMFVAKLIALCRWDKSAISILPEYLK KYSKLLINFKEFQDQVTDNEKYMVACTKEEFQKQSTYYLQEA EWSNQKY  
KPGFKDQVVLSTKSSAVQLLCVAAMVGWGGTMTTEA FEWVASGNAAVIACAKIGRFMNDIAAFKRGKNKRDV ASSVECYMNENG

---

---

VTSEAAFAKINALVEDEWRSTNQTRLTLLPMVQRIVNFTVSMALFY

>Os04g27790

TSSSLHEVALRFLLREHGLWVSPVTFNKFKGDDGRFMNGIADEPRGLLSLYNAAYLLVHDEPELEEAISFSRYHLKSMMQGNLKH  
PLSDQVKRALNTPLPRTSKRTETLHYLSEYGQEEGHMSILDLAKVEFNLLQGVHLKELKAISEWWRDLNEHVELSYLRDRVVESYTC  
SHMLFYEEGLAFTRITFTKIIVLIIMDDTYDSHATIQCERKLNIAIQRWNEASVSVLPEYLKNFYHKLLNNFKEFENQVVVSEKYRVA  
HAKKEFQILSHYFLQEAESHNNYKPSFEEQLALSTKTSTVQLLCVSTTVGRGDAITNEAFMWAASSTTVTSCAKIMRFMNDIASFER  
GKNKGEIASTVECYMNEHNIISEVAFAKLDSLVEDEWRTINQARCQLLPVVQRVVNLAICIMFFY

>Os04g52210

RDEEVMLDITTCAMAFRILRMNGYDVSSDDLCHIAEVSDFHSSHQGYLSDTRTLELYKASEVSVADNEFILDRIGSWSGRLLKEQLSS  
GALQRTSSIFEEVEHALDCPFYATLDRLVHKNRNEHFAAMSYISYAQNIPDELERIDSWVKENRHLKELKFAKQSAFYLSAAGTVFD  
PEMSDARIWWAINGVLTTVVDDFFDVGGSREELNLSLVEMWDEHHKEEYSEQVEIVFFAIFNSVNQLGAKVSAVQGRDVTKHLIEI  
WLDLLRSMTEVEWRISNYVPTPEEYMENAAMTFALGPVLPALYLVGPKIPESVVRDSEYNELFRLMSTCGRLLNDVQTYEREDGE  
GKVNVSLLVIQSGVSIEEARREIMKPIERCRRLLGLVLA VPGPCKELFWKMCKVCYFFY

>Os04g52230

RDEEIMLDITTCAMAFRLLRMNGYHVSSVELSPVAEASSFRESLQGYLNDKKSLELYKASKVSKSENEISILDSIGSWSGSLLKESVCSNG  
VKKAPIFEEMKYALKFPFYTTLDRLDHKNRNERFDKDSQMLKTEYLLPHANQDILALAVEDFSSSQSIYQDELNYLECWVKDEKLDQ  
LPFARQKLTICYLSAAATIFPRELSEARIAWAKNGVLTTVVDDFFDLGGSKEELENLIALVEKWDGHQEEYSEQVRIVFSAIYTTVNQL  
GAKASALQGRDVTKHLTEIWLCLMRSMTEAEWQRTKYVPTMEEYMANAVVSFALGPVLPALYLVGPKLQEDVVRDHEYNELFR  
LMSTCGRLLNDSQGFERESLEGKLSVSVLLVHHSISIDEAKMKAQKSIDTSRRNLLRLVLA VPRPCKQLFWKMCKIVHMFY

>Os04g52240

RDEEIVLDMQTCGMAFRMLRMNGYDVSSDELSHFSEPSSFHNSLQGYLNDTRSLLELHKASKVSAEKEVEYALEFPFYTILDRLDHKNR  
NIEHFDITSSQMLETAYLPCHSNEEIMALGVRDFSSSQFIFQEELQQLNSWVKESRLDQLQFARQKLDYFYFSAAATIFPELSDVRILW  
AKNGVLTTVVDDFFDVGGSKEELENLVALVEKWDKNDKTEYSEQVEIVFSAIYTTSTNQLGSMASVVQGRDVTKHLVEISDILWNYFFS  
EVRTDKLNIVASVNL CIRIAEVYDDRGRVEAEPHCILLGPKMPDSVIRSQECSELFRLMSKCGRLLNDVQSYEREGSQGKLSVSVLLAL  
HSGVSMEEAVKQIQRPICKRRELLKLVAVPRPCRELFWSMCKVCHFFY

>Os07g11790

---

---

NSSDLYEVALRFLLRKQGYWVSPDEFNKFKAEEDGSFSSDDITNDPKGLLSLYNAAHLLTHNEKALEEAILFARHHLQLLRGNLAYPL  
DEQVTRALEIPLPRTMKRVEVLNYIFEYSAEKMFNPSILELAVLDFNILQKVHQNELKEICQWWENLSSDIRLDYVRERVVECYFCAY  
AAYYEKEHARARMIFAKRCMLFSLDDTYDVRATLEEARKFNDAALQRWDKSDVSLLPEDLKRFFLSIISNFREFEDELPEHEKYRNSY  
NIKAFQILSSNFLQEAWEFHQNYIPCFTDHVTVSLQTGGAIELPVSLIVGMGDIATKEVLDWALANPDAGRAFAEVARFMDDLAASH  
SGRDKMDVASTVECYMNEHGVTVREVAEAKIAGMAEDGWKSMNQIRFAFLPFVQRIANLCMSATLLY

>Os08g04500

DTDNHYDLHTTALRFYLLRKHGYYASPDVFQFRDEEGNFTRDDTRSMLSLYNAAHLRIHGEEILDDAIVFTRNYLQSVVKHLQSPM  
ADEVCSALRTPLFRRPRRVEARHYISVYDKLPTRNETILEFAKLDGILQSLYCEELNILTMWWKELQLQDHLSFARDRMVEMHFWM  
LGVLFEPQYSYGRMTLTKLFIFVSIFDDIYDNYSTLEESKLFTEAIERWDEEAAEELPGYMKFFYKVKVLTMMKSIETDLKLQGNKHVDYV  
KNLLIDATRCFYNEVKWRSEDQVAATVEEHLKISVPSSCCMHVPVYAFVAMGDVTTDDAINWGMAYPKIITSSCIVGRLLNDIASHE  
REQGSSSSSSVEACMREHGITKEEAYAKLRELVEESWMDIAGECLAQPPPLLEAVVNATRVLDFVY

>Os08g07080

NDKDLHLVSLRFYLLRKNGYDVSSDMFQHFKDKEGSFVADDVRSLLSLYNAAFLRTHGKVLDEAIVFTTNRLRSELEHLKSPA  
ADEVCSALRTPLFRRVRILEIRNYIPIYESATTRNESILEFAKLNFNLLQLIYCEELKSITGWWKELNVESNLSFIRDRIVEMHFWMIGACSEPH  
YLSRIILTKMIAFITILDDIFDITYATTEESMMLAKAIYMCNETATVLLPKYMKDFLYLYLKTFFDSFEEALCPNKSYPVLYFKELFKRLVQ  
EFSQEIKWRDDHYIPKTIEEHLELSRKTVGAFELACASVGMGDLVAKETLDCLLTYPELLKSFTTCVRLSNDIASTKREAGDHHHAST  
IQSYMLQHGATAHEACVGIKELIEDSWKDMMKEYLDLQPKIVARVIDFARTGDYMY

>Os08g07100

NDKDLHLVSLRFYLLRKNGYDVSSDIFQHFKDKEGSFVADDTRSLLSLYNAAAYMRTHGKVLDEAVVFTTNRLRSELKHLKSPVADE  
VSLALDTPLFRRVRIETQNYIPIYESATTRNEAILEFAKLNVNLLQLIYCEELKTITRWWKELNVESNLSFIRDRIVEMHFWMTGACSEP  
HYSLLRIILTKMTAFITILDDIFDITYATTEESMMLAKAIYMCNESATVLLPKYMKDFLYLYLKTFFDSFEEALGPNKSYPVLYFKELREQA  
GDHYASTIQCYMLQHGTTIHEACIGIKELIEDSWKDMMKEYLNLQPKIVARVIDFARTGDYIY

>Os11g28530

DEEIMLDMATCAKAFRLRMHGYDVSSEGMAARFAERSSFDDSIHAYLNDTKPLLELYKSSQVHFLEEDFILENIGSWSAKLLKQQLSF  
NKISKSLMPEVEYALKYPFYATVEVLEHKGNIERFNVNGFQRLKSGYCGSGADKEILALAVNKFHYAQSVYQQELRYLESWVAEFLR  
DELKFARVIPLQSLLSAVVPLFPCELSDARIAWSQNAILTAVVDDLFDGGGSMEEMLNLVALFDKWDDHGEIGCSSNVEIMFNAVYN

---

---

TTKRIGAKAALVQKRCVIDHIAEQWQVMVRAMLTEAEWAAGKHIPATMGEYMSVAEPSFALGPVVPVSAAYLLGEELPEEA VRSPEY  
GRLGLASAVGRLLNDVMTYEKEMGTGKLN SVVLLQPASRGASVEAARA EVRRAIQASWRDLHGLVFIIPRPCREVFWHTGKVASV  
FY

>Os12g30824

NEEEVMLDIPTCAMAFRLLRTHGYDITSDEMAHFSEQSSFDDSIHGYNLDTKTLEL FFKTSQIRFSCEDLVLENIGTWSAKLLKQQLLS  
NKLSTSAQEVEYVLKFLHSTLDRLEHRRNIEQFKVEGSKVLKSGYCGSHSNEEILALAVDYFHSSQSVYQQELKYFESWVKQCRLDEL  
KFARVMPLIVHFSSAATIFAPELADARMVLSQTCMLITVYDDFFDCPESREEKENYIALIEKWDNHAEIGCSKNVEIVFYAVYNTYKQI  
GEKAALKQNRSIMDQLVEDLVSSAKAMMVEADWTATKYIPATMEEYMSNAEVSGAFASFVCPPLYFLGLKLSEEDVKSHEYTQLLK  
LTNVIGRLQNDSQTYRKEILAGKVNSVLLRALTDSGNTSPESIEAAKEIVNRDAESSMVESLPIPRPCKDRFWEMCKIVFYFY

---

*Phalaenopsis equestris*

>Peq011991

YDDNDLYTVALRFLLRQQRYNILADVFNKFLDEKGDIKDCFSSDAKALLSLYEAGNLALPTEEMLDKAVNFSKSRMLMSMKSELEPH  
FALIVSSIDIPLFKRTDRIKTRSYLSIYEQVSDFNQVLLFAKMDFNCLQALHQEEARKITLWWKNLGLAERLPFARDRLVECYFWVLS  
VYFEPYRSRRLMMTKCITQMSFLDDVYDVYGTLEELEILTHAIQGW DIESASKLPEYMQHSFSLINTFEGMETELAPEHNSFRIQYLK  
NELQKIARAYLQEAKWAKTSYVPKLEEHLEISLITAGYAFLTCASYVGMEEVIPKDVFDWVMSFPEIHKASCIIGRLMNDIVSYKLEQER  
NHVASAVQCIVMEQECSEEEACKKVLEMSNNAWKVINKEFAMSANLPFYLVWPIINLARFNEFIY

>Peq011994

YDENDLYTVALRFLLRQQRYHISSDVFSKFLDEKGFKDCFSSDAKALLSLYDAAHLGMATEEILDKAINFSKTHLISMKSQLEPHFS  
LMVSSSLEIPLFKRTDRIKTRNYLSIYEQDTKFNEALLEFGKFD FICLQAMHQEEARKLSMWWKNLGLSKRLPFSRDRLVECYFWVLSV  
YFEPYRSRARIIMTKCITQMSFLDDIYDVYGTVEELHLLTDAIEGW DIKLIDKLPEYMQHSFRSLFETFKEIEIELAPEQSSFRVQYLIYELK  
KVS KAYLQEAIWANKCYVPKLEEHFGASLLTAGYSFLTCASYMG MKEAISKEVFDWVISLPEIVMSSCVIGRLMNDIVSFEHERKRTH  
VASAVQSYAMEHGCSEEEACNKLTEMSNNAWKSINKEFVELSNLPLSLVWPIVNLARFNEFIY

>Peq021785

KDEEYLNIA TCAMSFRLRLHGYDVSSDALAPFADMRFKNTLQGYIRDLN AIIELYKASQVQISPEEAVLKKLNSWVTHFLKEELNT  
NANHSLDILQEVDHTLGFPHYASMERLEHKL NIEHYNSDKLHMLKSSFVYSMKNNDLLKLA VHTFNNTSQLTYKKELQYLESWVKES  
KFNQLGFSRQKQIYCYLSAVMTFFSSETSSARICWAQCSTLITVIDDFDFGGSSEELANLIKLVKEYALSLSFVVAIMKNIFVIDGSIFGR  
WHGVQEKDFCSENVKIIFFALYNTINELGAKASL FQKRDVTKDIINVWL VLLSSEMKEAEWRQNSTFPTFDEYMTSAIPSFALGP IILPSI

---

YLAVPELLENIIGSPEYKNLLKLLGKFGRLINDIQGYQREKATGKLNLSLWLIVHHGNGSISEEDARKHMWSLIDSTRAELLGLVLQNK  
GSVVPRACKEVFWKTCKAAYIFY

>Peq014251

RDILHNNLDGSALLFRLREYGIRVPNPSEDFLIKCFKNESGSLKVNIINDVKGMLSLYEASYLANDDEDELDEAKKFTNKNLSIYLKEP  
VLINHSLVEQIRHALELPLHWRMPRLHTRWFIDAYGKQEKMNPHLLKLAKLDFNMLQSIYKELKEMSRWWKSLGLAGGDFSFAR  
DRLMENYFWSMGCTFEPHFWRRCRKEITKIGSFLTTIDDIYDIYGSLEELMIFTDVVNEWKTTGNEKLPNNMKKTL SALFNTMNDIAAV  
TLAERGLDILPRLKRLWRDQCKAYLVEAIWYHTRYPTPFNEYMENAWITIGVPLLLTCAYCLSEDLTLEALNCLDFYPKVTRYSSMITR  
LYDDLATSTDELQRGDVPKSIQCYMMEANVSESVAREHMKYLIEKYWKLLNYEYLHNLNMEECFKRHVLNFPRTVQFLY

>Peq010503

YGESHEINLQAAALKFRLLRQHGYRVTSDFVRKYKDEEGEFRSDLADDVRGLLSLYEACFMATHEDDLNEALSFTTEHHLQRSLSEKE  
DLQHESPALKKLISQALELPLHRRIPRLGARYYIDAYEHDKEQRNDTILELAKLDFHLLQLLHYEEARSLSIWWKGIGCSEIFKFSRDRI  
VECYFWILSVYFEPQYSKARKITTKVIALLSITDDIYDAYGTSDELQSFTNVIQRWDMEAAEQLKEYLKIQFHNLNRAFQEFEDLSSNG  
KSYRVHYLKEILKVVVRAWNMEVKWRNEGYIPALKEHLQVTTVTTCYNLLTCASLIGMGDEV TIEAFDWISSFPEFTYQASLICRLRD  
DVVSQEFEQKRNVASAVQCYMNEHNSTLDDSCKMLLKLVESSWKS LNHEYLSLSKTFTKAVLMRVINLARVMETAY

>Peq008177

ARNSEVRDIDDTAMGFRLRLHGYSPDVFRNFKRDDKFFGFIGQSTQAVTGMYNLNRASQLIFSGEEILNQAKNFSYQFLREKQAS  
NLLLDKWWISKDLPGEVAYALDFPFYASLPRVESRWYIEQYGGDDDVWIGKSLYRMLYVNNNAVYLELAKADFNQCQAIHKLEWLSL  
QRWFEACVRKEYGMRQKNVLRAYFLASASKFEPDRSAERLCWAGTAALAQA VVVSYNDSSATNKVEHCSTRPDPDHQCRSKQTAE  
ELVGHILMLLDRPLLLRVP AQTFRHHLRRAWEEWLVKLEEGESRGETALLVRSIELCAGRTEPEGGAARLEYDKLVRLTISICGRLPV  
HEGNKIRIADDSHLES DMQQLIKCVLPESPDGLSGPTKQTF LAVIKSIYYLAWCPPAALDDHITKVLFERVG

>Peq023158

FDSNDLYAVALHFRILRQQRYYISCDVFEKFC EEKGEFRCSLSSNVNALLSLYEAA YLSLPGEEILDKAKIFSKPLLKTS LCNLEKHLAM  
MVSAALDVPLVRRVDRPRTKLYLSIYKND S LFNKLLLDFAKLDFFILQTLYQEEVRSLSIWWKDLGLAKCFPFSRDRIVELSFWLISVHH  
EPFLSRVRNMLTKLLALLSLTDDIYDNYGTVEEELFTNVIKSWEIEAVSMLPKYMQPCFLAFHKTINEFERELEQEYQSFRVQYLIIEIK  
KMAQAYYEEAKWSS ELYVPKLDQLKASLATAGHSVISCASYMAMREDIPENLFEWVTSMPAIMTSSSLIGRVMNDLASCEFDQSKG  
QVASTVQCYMVEHKSSKEEARMKLMEMVEEGWKIINREFMFSTISIALIQTIINITNFNVLVY

---



>Peq022099

KDEEISNVATCAMTFRLLRMHGYDVSSNALSPFVDVRHFKNTVQGYIGDLNAAIELYKASQVQISRDEPILKKLNSWVTYFLKEELN  
TNSINSLDISQEVDTLRFPFYASLERLEHKRNIECSNLDNLQMLKTSFVASMNNNDLCELAVDAFSSSQLICKRELQYLESWVKESKL  
DQLGFSRQKHMICYLSAASTLFSSELSSVRLCWAAGGVLTTVVDDFFDGGGSSEELANLMKLVEKWHEIHEKDFCSENVKIIFALYN  
TINELGAKAFVIQKRDVTNHMIDIWLTMMNSMMKEADWLKNNIVPSLDEYMTAIPSFALGPILPSLYFVGPELSENIITHSDYYKLY  
ELVSKVGRLSNDIQGFERDKAQQGLNSLSLVLHGNGSVSEEDVRRDAWRMIDSTRAELLGLVLQNEGSLLPRACKELFWKMSKILHF  
FY

>Peq027069

RMTNDAYVMAMYFRLSREHGLVASKDLLVQCYKDENGSYKPYVLHDTKGILSLEYEASFLAMDGEDELDELKEFTLKQLRYLKTSNSS  
TNPKLSEYIAKALELPLHHRIPKLQAPIFIRLARDIEEVNPDPIVIEFAQLDFNMTQSIYIRELKEITSYV

>Peq017060

GDGEVNPSAYDTAWIARIPSIDDPTKPLFPRTLEWIMKNQLEDGSWGESTFFSLYDRLVCTLSCHIITLTKWSQGDELIARGLHFLQTRIQ  
DLGNEKSVRTVGFEMIFPSMLNEAKTLGLHLPYHLPCMKHIIKLREEKMRRIPMRLMHSVQTTLLHSLEAIDANLVQWDRILKLQCA  
NGSMWDSPSATVATYLNNTDEKCFEYLTIVKRFKDHAPFTYPLDTFERGWMIDTIQRLGIDHHFREEIFDLDYLYRYLRKDGGLWE  
REAVTDDIDDCMGLRLLRLHGYPVSSDVLEYFKDNNDTFLCFMGETHKGVSEFFNL YRFSQIAFPGEKILKEAKFAEQHLKIGIND  
NQAYDKWAIKKALQMEIEWGLRNEWKMSLPRLDAQEYIRNYGENDVWIGKSVYRWKPALVQVLPTKLKRVFMGVYDTMNELETV  
AKNAQQKDIISYLHDLRKKQVQQYLYTREVKDTKQIESFEEYVDHVKNGLAVAIRLVPAMFLVRDALSAKALEDMNLVTKDRVAVR  
LYMKEQICPEQDVVSYLSEKVDDAFAELTHEYLKPNKYTPHSYLRRLIFEHGRIRFHL

>Peq017061

GSDASVTDLDDTCMGLRLLRLHGYPISSDMLEYFRDDEGNFLCLKGETHKGISDFFSLYRFSQIAFPGENILKHAKKLAEQHLMKNIK  
GRQAFDKWAIKKALHQEVEWALRNQWMKCLPRLEAQEYIRNYGENDVWIGNTIYRMYNINNPKYLELAKLEHNKLHSMHTEEA  
NSILLWWNSYGFDDPLITQLNPKEIHLISICAALCEPKFSTARITYTKWNCIESMLKYMESHHSIEELKLFSHAINWKPSLVQVLPTQL  
KRVFMGTYDTMNGLAIEGKDVQGIDVFPYLHDLRKKQVQQYLMFREVKDKKQFKNFEDYVHQVKRGIAVAIRLVPAMFLMGDVA  
PDKVLKLLDQKSTILDYLDTYIALMNLVTEERV AISLYMKEQNYSVQEAQAFLEEKIDETFANLTQEYLKPNNHISHFHRRLLIFEHGRIF  
RFFL

>Peq009409

---

RMTMDAYVMALYFRLSREHGFVASKDLLVQCYKDKNGSYKPSVLHDTKGILSLYEASFLAMDGEDELDELKEFTLKQLRYLKTSNSS  
TNPKLSEYIAKALELPLHHRIPKLQAPIFIRLARDIEEVNPDPIVIEFAQLDFNMTQSIYIRELKEITSYV

>Peq011850

IGDDDDLYAVALRFLLRQHXYQITSDVFIKFLDDKGEFKSPLCNDVRALLSLYEATYLGFPDEEILDKAKNFSRVHLKSSIYNTEPSL  
ALMVSSALELPLVRRTDRLKARSYLEIYENYNLCNKKLIDFSKLDNFLLQAIHKEEVQVISVW

>Peq017062

GDGELSTSPYDTAWVARIPSKNDPSKPHFPTTLEWVVKNQLEDGSWGEPIFFSLYDRLVCTLSCVITLTQWKQGHELIAGLYFLQTRI  
KDLGEGKVRTVGFHIFPSMLNEAKVIGLNLPLYDLPCIRHIIKLRKREEMTRIPMEVLHVSPTTLLYSLEAIEADLVQWDRILKLQCRNG  
SISDPSATAAAYLNTNDEKCLEYLYIVKQFQDCAPSLYPVDTFERCWIIDTIQRLGIDHFRKEIHITLFEVYRILRKDGLAWGSDASI  
TDIDDTMGLRLLRLHGYPISSDMLEYFKDDEGNFLCFMGETHKGISDFFSLYRFSQIAFPGENILKHAKKLAEQHLKSKMKGHQAFD  
KWAIKKALHKEVEWAIRNQWRMSLPRLEAQEYIRNYGENDVWIGKSLYR

>Peq006301

NNLIENNNLYGLALLFRLREHGITNTSSLRADVLITNIKRQDQSFNPNHQSDVEGMLSLYEASYLAEIEGEEELYESGKLAKEQLRYIDS  
YLISPQLAENINYALEIPLHWRMPTRWFIDSYGRRENVNPTLLELAKLDFNMVQSIYKAELQEMSRWWKNLGLVCDELNFARDRLVE  
NYLWAIGIAYQPKFWRCREAITKIICLTTIIDDYDVYGTLDLKLFTKAIEEWKMDAAHQLPDFMKICFNALLNTLNGIASSFSMEKQ  
LDILPCLKRVLTDLCKAFLVEANWYHNRYTPTLDEYLENAWITIAGICPLIASYCLNDDMTIEDLNSLEFYQPIVRYSCLLLRLYDDLGT  
TTAEIQRGDVPKSIQCYMNENNVLESVARDHIKCLITNYWKKLNNERAKISRSIESFKKALVDMPTAQCIFY

>Peq006309

NNLIENGNLHGSALLFRLREYDIKNASLLRVEALINCFKSERGNFNPNHQHNVKGLLSFYEASYLAMEGEEQLDEAGKIAMERLRN  
LDISLLSPQIIEEINHAFELPLHWRMSRLHARWFIDVYGTRENVNPTLLELATLDFNIVQSIYKAELQEMSRWWKNLGLVCDELNFAR  
DRLVENYLMALGFTFQPEFWRIRKAITKLSNFVTIIDDYDVYGTLDLKLFTNAVEEWKIDAGQQLPNYMKKCLDALFNTMNDIAT  
SFSVEKELDILPCLKRVVIKYLFQFSMSFKL

>Peq013532

CEVVIPCGLRTTAICFRLRRFGFQVSEGIFDDFMDSHKTfMPCDDADELLSYNASDMAFHDETKMDAARSFAVKHLKVISTVG  
RIKRSVKHALDLPLQRRMPWMEARVYMDMYEDEDGMSPALLQLAKIHFNEVQSIHQQELKQVNVNWWGRLDMGKTLFSRNRLE  
CFFYVVGIVNDPDYGFCREKLTQVGLLIAYIDDVYDIYGSLEELFTQIIDRDMKDMIELPDYMKICFSTLNDIINEVTSQLSMDDSHK

---

HMQWADLFKTFLVEAKWRKDRYIPTLKEYLSIATISISGHVILLHTYVLLKCKITKETLQQLODFPNIIRFSSLIFRLSNDLATSSNLQEER  
ERGKTAIAVQCYMNEKGASEEEEARLYISVLISDAWKELNREYSACSYQCQFPQQFIDASINLARMASFMY

>Peq013535

CEVVIPCGLRRTTAICFQLLRRFGFLVSEGIFDDFMDSDHKTFMPCDDADELLSLYNASDMAFNNGEKKMDAARSFAVKHLKLISTVG  
RIERAVKHALDLSLHRRMPWMEARVYIDMYEDEDGMSPALLQLAKIHFNEVQCIHQELKNVINWWARLDLGGKLSFSRNRLIECF  
FYVVGIVHGPDSGFCREKLTQVGMLIATVDDVYDIYGSLEELFTQIIDRWDMKDMIKLPDYMKICFSTLNDLITEVASQLSLNDRLE  
VMPYLKRAEERDRGETAIAVQCYMNEEGASEEEARMYVSVLISDAWKEMNREYFTCSYYSKFPQQFIDASINLARMASFMY

>Peq025553

KDEEYANIATCAMAFRILRMNGYDVSSNALAQFADVKQFKNTLQGHMRDLNIIELYKASLVQISPEEPVLKKNLAWVTHFLKEEL  
NTNAIHSLDVLQEVDTLKFPHYASLERLEHKRNIEHYKWHEIHEKDFYSENVKIIFLALFNTVNELGAKASLFQNRDVTKHIIKMWQ  
DLLKSTMKEANWIENSTVPTIDEYMTNAISFALEPIILPTIYFIVPELSENIIGSSEYNNLFLKLVSKFGRLFNDIHFETDIAAGKRNSLWL  
LVHHNGSISEEDVKKDMLSLIDSTRAELLGLVLQNVGSVVPRACTKEVFWKTCKTLQIFY

>Peq011573

NKNNVAFQLYKDSLAFRLRMKGYQVSPWRFCWFIDDEEIMSHIKDNHRFFLGPMLSIYKASHIAFPDDHKLDKAGEFARQILQMGI  
LSMKSNETIFLSTSPLLQQEIEHELGLKWLARMDHLEHRFYIERGGIYLFWIGNNAPYCKILQNDDLLQLAIDNFTTRQIVYKKELHE  
LHRWAKDTGLSTMGFGREKTSYCYFAVASSICFPINIDSRKEAAKCATFIAVADDFDEKAPLDELFIKLDALQRWDGEFLTGHSKVIF  
NALDNLVHDISQKSFKRYGYDVKKILQDAWKEIFNSWLKEAEWARSSHCP SIDQYIEIGKTSVAVQMMIFASCYL TNSNIYVEESCWD  
ISNTMITQSVME SCRLLNDLESYEKEAMVGKPNILLYLKENPKEGIDDAKAFVMNILEKKKKKILQLVMSKDSTKSEMPTEWKDLHL  
SALKVFQMF

---

*Populus trichocarpa*

>Pt0001s31550

DNREMKEDLYGTSVEFRLLRQHGYNVPQVFN SFKDEQGNFKNCLRDDVKGMLNLYEASYLVNGESILEEARDFSEKHLKEYSKEQ  
NEDHYLSLLVNHSLELPLHWRMQRMEARWFIDAYGRKRDLNPILLEFAGLDFNMVQAKYQEDIRHASRWWTSMDLGNKLFYTRD  
RLMENTLWAVGEVFEPQFGYYRKMATRITALD DAYDVYGTLEELEVF TDVIESWDVNALDQLPYMKISFFALFQSINEIGYNIL  
KEQGINVPSLKKLWGDLCRAFLKEAKWYYAGYPTLQEYLDNAWLSVSGQVILGHAFVLVTNQLTEEAVRCCMEY PDLIRHSSTIV  
RLADDLGTSSDEIARGDNP KSIQCYMHETGATEQEAREHVRYLIYETWKKLNVEILPFSK KFMGIPMDLARTAQCFY

>Pt0001s31570

---

---

DNREMKEDLYATSVEFRLLRQHGYNVPQDVFNFSFKDEQGNFKNCLRDDVKGMLNLYEASYLVNGESILEEARDFSEKHLKEYSKE  
QNEDHYLSLLVNHSLELPLHWRMQRMEARWFIDAYGRKRDLNPILLEFAGLDFNMVQAKYQEDIRHASRWWTSM DLGNKLFYTR  
DRLMENTLWAVGEVFEPQFGYYRKMATRITALALDDAYDVYGTLEELEVFTDVIESWDINALDELPPYMKISFFALFQSINEIGYNIL  
KEQGINVVPSLKKLWGDLCRAFLKEAKWYYAGYTPTLQEYLDNAWLSVSGQVIIIGHAFFLVTNQLTDEAVRCCMEY PDLIRHSSTIV  
RLADDLGTSSDEIARGDNPKSIQCYMHETGATEQEAREHVRYLIHETWKKLNAEILPFSK KFMGIPMDLARTAQCFY

>Pt0001s31580

DNREMKEDLYGTSVEFRLLRQHGYNVPQDVFNFSFKDEQGNFKNCLRDDVKGMLNLYEASYLVNGESILEEARDFSEKHLKEYSKE  
QNEDHYLSLLVNHSLELPLHWRMQRMEARWFIDAYGRKRDLNPILLEFAGLDFNMVQAKYQEDIRHASRWWTSM DLGNKLFYTR  
DRLMENTLWTVGEVFEPQFGYYRKMATRVNALITTLDDAYDVYGTLEELEVFTDVIESWDINALDQLPPYMKISFFALFQSINEIGYNI  
LKEQGINVVPSLKKLWGDLCRAFLKEAKWYYAGYTPTLQEYLDNAWLSISGQVILGHAF FLVTNQLTEEAVRCCMEY PDLIRYSSTIV  
RLADDLGTSSDEIARGDNPKSIQCYMHETGATEQEAREHVRYLIHETWKKLNAEILPFSK KFMGIPMDLARTAQSFY

>Pt0001s44080

DDDDHHNDLYAISLKFRLRQQGYKISCDVFGKFKNSQGNFNDSL VNDTRAILSFYEATHLRVHGDEVLEEALVFTTSHLEFLATHSS  
SPLRAKINHALKQPIRKNIPREARNYFSVYQEDPSCSEVLLNFAKLDFNILQKQH QKELSDIAKWWKELDFAKKLPFARDRVIECYF  
WILGVYFEPEHFLARRMLTKVIAMTSVIDDIYDVYKPEEELFTDAIERWEITAVDLLPEYMKV TYKALLDVYTEIEENMVNEERSYR  
VYYAKEAMKNQVRAYYHESKWFHQHTPTMEEYMAVALVTSAYAMLAATS FVGMGVVTKDSFDWLF RGPKILKASEIICRLMDDI  
VSHKFEQKRGHVASSIECYMKQHGTTEQETVHEFRKQVTD AWKDVNEEF LAVPMP LLTRMLN LARVIDV VY

>Pt0002s05300

ARNSEVHDIDDTAMGFRVLRNLNGHHVSADVFKHFEKGGEFFCFAGQSTAAVTGMFNLYRASQLLFPGEKILEKAKEFSFKFLREKQA  
ANLLDKWLITKDLPGEVGFAL EIPWHASLPRVESRFYIEQYGGEDDVWIGKTLYRMPYVNNNEYLQLARLDYNNCQALHRIEWANF  
QKWYEECNLRDFGISRKTL LYSYFLAAASVFEPERSNERLAWAKTTILLEMHSYFDDDNSGAQRRTFVHEFSTGISRSGKTRKELVKM  
LLGTLNQLSFGALEVHGRDISHSLRHAWERWLISWELEGDRRRGEAELLVQTIHLT AGYKVSEELLVYHPQYEQ LADLTNRICYQLG  
HYKNKHDNGSYSTIGSTDRITTPQIESDMQELMQLVIQKGIDPKIKQTFLQVAKSFY

>Pt0004s02970

SPNHLPLDVFGVALRFRLLRQEGYNVSQEVFN NFKNNEGNFH LIQENDVKGLMALYEASQLSMESEDILDEAGEFS AKLLNHHESEI  
VANTLKHPYHKSLARFMVKNFLNNIDIRNENIKVFSELAKIDCEIVRSIHQKEILQISNWWKDLGLAKELKFARDQPLKWHMWSMSV

---

---

LIDPNLSEQRVELTKPISLVYIIDDIFDLYGTLNDLSIFTEAVNEWDLTAANQLPESMKISLKALFDITESISTKILEKHGWNPIESLQKSW  
KKLCNAFLEEAKWFASGKLPKPEEYLRNGIVSSGVHVVLVHMFLLGQGINKETVDFVVGFPPIISFTATILRLWDDLGTAKDENQDG  
HDGSYLECYIREHNVTVRAREHVSHLICDAWKKNQECLPFSPSFTKACLNVARMIPLMY

>Pt0004s02990

SPNHLPLDVCGVALRFRLLRQEGYNVSQEVFNFKNEEGNFHLIQENDVKGLMALYEASQLSMESEDILDEAGEFSAKLLNHHESEI  
VANTLKHPYHKSLARFMVKNFLNNDIRNENIKVFSELAKIDCEIVRSIHQKEILQISNWWKDLGLAKELKFARDQPLKWHMWSMSV  
LIDPNLSEQRVELTKPISLVYIIDDIFDLYGTLNDLSIFTEAVNEWDLTAANQLPESMKISLKALFDITESISTKILERHGWNPIESLQKSW  
KKLCNAFLEEAKWFASGKLPKPEEYLRNGIVSSGVHVVLVHMFLLGQGINKETVDFVDGFPPIISFTATILRLWDDLGTAKDENQNG  
HDGSYLECYIREHNVTVRAREHVSQLICDAWKKNQECLPFSRSFTNACLNVARMIPLMY

>Pt0004s03810

WTNSMATQLYKDSLAFCLLRMHGFRVSPGMFCWFLLEEVQDQIESNHEYFSSVILNVYRATDLMFPGDHELEEARSFSRKLLEKTTT  
MGNEHQHTVPPFSHSVIKHELRFPMARLDHLEHRMWMEEEEHWNIVMMWTNIQRFDTCRLSCLHNDKQKQAVKNYEFRTT  
YKSELEELTRWSKSWGLSDMGFGREKTAYCYFAVAASTSLPQDSEIRMMVAKSAIVTVADDFYDMEGSLDDLEKITDAVQRWDATL  
SGHSKTIFDALDSLVLNELARKYFRQHGTIDITNSLRDIWSETFASWFTEAKWSKSGFIPAAEYLETGMTSIASHTLVLPASCFLSPSPDY  
KLNVPQYESITKLLMVIPRLNNDIQSYKKEQKEGKTNFVLLHLKENEADIEDSIAYAREILDKKKKELLEHMDDFSKPCRHLHLSCVKV  
FQMFF

>Pt0005s09830

GNNFDDDLFTVALRFRLLRQYGYNVSSDIFNEFKDGKGNFKDNLIDDVEGLLSLYEASFLGGHGEDTLKALSFCCKTHLESVAHLV  
SPLADKVSHALKRPLLKGVPKHEQWHHILYQQDEACTGAVLKLAKLDFNVVQKCYQDELRIISRWWIDLDFATKLPFARDRVIECF  
FWGLGAFLEPQFVLARRFITKVLIFLSILDDIYDVHGTTIELELFTEKIERWDTSMEDLPDYMKLFFFEALIGFFDEIEQETGKEGRPYCVH  
YSREMLKNQARAYLIEARWFNQDCVPQLEEYRRGGVYTSCYPMAAVAWLCGMATGSKEVFEWMLKNPKIVVASSDIGRLMDDITS  
HEFEQERGHVASAVECCMKQYGVSKKEAYDMLNKMVESDWDKINEELLTVPRQVLILMLNLARIIDVVY

>Pt0005s23190

ARNSNVHDIDDTAMGFRILRLHGHQVSADVFKHFEKGGEFFCFAGQSTGAVTGMFNLYRASQVLFPGEKILEDKEYSFEFLREKQA  
ANLLDKWIITKDLPGEVGFALEIPWYASLPRVETRFIEQYGGEDDVWIGKTLYRMSYINNSEYLQAKLDYNNCQALHRIEWENFQK  
WYEECNLRDFGISRRTLIFSIFLAAASIFEPERSKERLAWATTTVLLDIVGSYFNHNNSSEQORRAFIHEFSYGINGREDLCLVCQELVKLL

---

---

LGTLNQLSLGALVVHGRDISHSLRHAWEKWLLIWELEGDRRQGEAELLVQNTINLTAGYLVSEELLAHHPQYEQLVDLTNRICYQLD  
HYKKNKVHYNGSYSTITSNTDRITTPQIESDMQELVQLVVGIDSNIKQTFLOVAKSFYY

>Pt0007s02810

GDLHTTSLHFRLLRQHAFSVSTDVFGKFRSRDGKFKDSIRTDVAGLLSLYEASYLGVPGEDHVLEEAKNFSSKHLKSLETIKDEFLAQ  
VKQSLEVPRHWKMPRIEARDFIDIYSSDNTRNLDLLELAKLDYNLVQSQHRELKELARWWGALGFKEKLSFSRDRMLMENYLWAM  
GMVFEPQFSKCRIGLTKFVCILTTIDDIYDVYGLPEEELFTKLVNRWDSMAIDDLPDYMKICYLALFNFNEMAYDVMRDHGLFVLP  
YLVEEWANLCGSYLVEARWFSNKYSPTLSEYLENARTSIGSPAALAHACMLLGSVAQSSLMDCFKHGNQQLIYWSSLITRLSDDLGT  
TAESERGDVTKSIQCYMIEKGASEKESKEHIKGLINQAWKELNKEKCSLPLVNMSLNMARTAQCIF

>Pt0007s02920

SYVEAEKSLRATALCFRLLRQHDIFHGFIDDQGNFMASLHNDIEGMLSLYEASHLACEGEEILNKANKQTSIYLRNHLGNSDSITARVS  
HALEVPLHHKMIMLEARWHIESYGKREDANPTLLQLSKFDFNMMQSVLQRDLQDMSRWWHDGLGNKLRFSRDRLMCEFFWTVG  
MAFEPEFNSCRKGLTKVTSFITTIDVDVYDYGALDELEAFTEAVERWDVSAVRNLPDYMKLCFLALFNTVNMAYDHLKEQGEDAIP  
CLTKAWADLCKAFLQEAKWSYNNITPSFEEYLENAWRVSVGTVILIHAYFLMGENISKQALDYLVNYDELLRWPSIIFRLSNDLATSSA  
EIARGETANSISCYMYETGASEAEARKHIEKLIQKAWRNMNKCCQIPFARSFVGTINLARIAQCTY

>Pt0007s07360

FLENDHDLHTVALLFRVLRQYGCKVSSDVFKKFKDTNGEFKKTITSDVKGNLSLHEAAHLSVNGEQILDEALEFSRTNLESLATQSG  
PRLARHIKYALIRPIHKTQVQRLEAREYISFYEEEDFRNETLLKFAKLDNFNRVQLLHQQELSTLSSWWKDLNLVEELPYARDRIVEMYFW  
VNAMHFEPQYALARILSTKLGALITVIDDTYDAYSTYEELQHFTKAVIRCNIDAIDQLPDSMKALYRALLSYFDDVANEVSKNGKSFT  
AVNYVKEEMKEMIRTYIVEAQWCNDRFVPLNEYVRNGKISIGFMATTTVFFVETARIKELEWLTSKAKISEAGCLFLRLMNDIVTH  
EFEQKREHCASAIECYMKEYGVSMEAVKELQKTCADAWKDINEDCLAISMNLLNVCVNNARATDVVY

>Pt0007s07410

LLENDHDLHTVALLFRVLRQNGCKVSSDVFKKFKDTNGEFKKTITSDVKGNLSLHEAAHLSVNGEQILDEALEFSRTNLESLATQS  
GPRLARHIKYALIRPIHKTQVQRLEAREYISFYEEEDFRNETLLKFAKLDNFNRVQLLHQQELSTLSSWWKDLNLVEELPYARDRIVEMYF  
WVNAMHFEPQYALARILSTKLGALITVIDDTYDAYSTYEELQHFTKAVIRCNIDAIDQLPDSMKALYRALLSYFDDVANEVSKNGKSFT  
TAVKYVKEEMKEMIRTYIVEAQWCNDRFVPLNEYVRNGKISIGFMATTTVFFVETARIKELEWLTSKAKISEAGCLFLRLMNDIVT  
HEFEQKREHCASAIECYMKEYGVSMEAVKELQKTCADAWKDINEDCLAISMNLLKVCVNNARATDVVY

---

---

>Pt0008s08190

GEEEIFSDNATCALAFRILRLNGYDVS LDTLNQFSEDFNSLGGYLKDSGA ALELYFPPLQVHDALNFS DHANLQRLAIRRRIKHYA  
TDDTRILKTSYRCSTIGNQDFLKLAVEDFNICQSIQREEFKHIERWVVERRLDKLFARQKEAYCYFSAAATLFAPELSDARMSWAKN  
GVLTTVVDDFFDVGGSEELVNLIELIERWDVNGSADCSEEEV EIIYSAIHSTISEIGDKSFGWQGRDVKSQVIKIWLDLLKSM LTEAQWS  
SNKSVPTLDEYMTT AHVSFALGPIVLPALYFVGPKLSEEVAGHP ELLNLYKVTSTCGRLLNDWRSFKRESEEGKLN AVSLYMIHSGSTE  
EEAIEHFKGLIDSQRRQLLQLVLIIPRCKDLFWNMIKLLHTFY

>Pt0008s08220

GEEEIFSDNATCALAFRILRLNGYDVSLEDHFSNSLGGYLKDSGA ALELYRALQLSYPDES LLEKQNSRSTSYFLKQGLSNVSLCGDR LR  
KNIIGEVHDALNFPD HANLQRLAIRRRIKHYA TDDTRILKTSYRCSTIGNQDFLKLAVEDFNICQSIQREEFKHIERWVVERRLDKLF  
ARQKEAYCYFSAAATLFAPELSDARMSWAKNGVLTTVVDDFFDVGGSEELVNLIELIERWDVNGSADCSEEEV EIIYSAIHSTISEIGDK  
SFGWQGRDVKSHVIKIWLDLLKSM LTEAQWSSNKSVPTLDEYMTT AHVSFALGPIVLPALYFVGPKLSEEVAGHP ELLNLYKVMSTC  
GRLLNDWRSFKRESEEGKLN AISLYMIHSGSTEEETIEHFKGLIDSQRRQLLQLVLIIPRCKDLFWNMIKLLHTFY

>Pt0011s03440

KNLKVEENLYVTALRFKLLRLHGYEVSQGVFN GFFDGTDFDKSKCTDVRGLIELFEASHL AYEGEATLDDAKAFSTRILTGINCSAIESD  
LAKHVHVHLELPSHW RVMWFDVKWHINAYENDKQTNRHLLALAKVNFNMVQATLQKDLRDVSRWWRNLGIIENLSFTRDR LVE  
SFLCTVGLVFEPKYSSFRKWLTKVIIMILIIDDVYDVYGS LHELQQFTKAVSRWDTGEVQELPECMKICFQTLYDITNEMALEMQREKD  
GSQALPHLKKVWADFC KAMFMEAKWFNEGYPQLQEYLSNAWVSSGTVISVHSFFSVMTELETGEISNFLEKNQDLVYNISLIIRLC  
NDLGTSVAEQERGDA ASSVVCYMREVN VSEEVARNHINNIVKKTWK KINGHCFAKSPTLQLLNTNMARVVHNL Y

>Pt0011s14600

GAYVHDHDLQMVALRFRLLRQQGRYVSCDVFKKFKDTEGNYKVCLANDIQGMLSLEYA IHLRVHREDILEDALTFATTHLKSITTD  
MCPPLLKLRHALDQPIHKDLPWLGAKHYISIYEQEASHSEVLLKFAKLNFNFLQNMHQKELADMTMWWK KVDLSKKLPFARDR  
LVECYFWILGVC FEPQYSFARIIMTKVIAMTSVMDDVYDVYGTMEELVLF TDAIERWDISNIDHLPEYMKFFYKQLSDVYKEIETELAA  
QGRSYRVDYAKEAMKKQVQAYFVEARWLHENYMP TMDEYMRISLISSGYPLLT CISFVGMGDIVTKDAFEWLNKDPKIVKAASLIAR  
LMDDIVSHKFEQERGHV ASAVECYMNQHEVSEEQAYDELRRQVVEAWKDINEELLHVPIPLLTRVLNLARVMDVMY

>Pt0015s05270

DMEDDDLYNTALGFRLLRQHGYNVSCDIFNKFKDDKGYFKPSNDVRGILGLYEA AHLAVHGEDILDEALFTTIHLKSMATSPNCPL

---

---

TAKVSHALKQPIRRGVPRLSRRYISFYQDEPSCNKTLRLAKLNFNVVQELHKEELSEITRWWKGLDFARRLPFARDRVVECFWIVG  
AYFEPQYSLARKILTKVIAMTSIIDDIYDVYGTLEEELELFTEAIDRWDTKSMDQLPDYMKICYEALLNVYSEIEEKVAKEGWSYRVHFGK  
QAMKVLVHAYFDEAKWFHENHIPTMEEYMQVALVTSGYSLLATVSFIGMGDMVTEQAFDWWFNRPKIVRASETISRLVDDVRSHKF  
EQERGHAAASGVECYIRQYGLSEQEVYKEFHMQVVNAWKDINEECLAVPMPLLERILNLTRVIDVIY

>Pt0015s09710

DMEDEDLYNTALGFRLLRQHGYNVSCDIFNFKFDDKGYFKQSNVVRGILGLYEAHLAVHGEDILDEALFTTIHLKSMETSPNCPL  
TAKVSHALKQPIQRGVPRLSRRYISYQDEPSCNKTLRLAKLNFNLVQELHKEELAEITRWWKGLDFARRLPFARDRVVECFWIV  
GVYFEPQYSLARKILTKVIAMTSIIDDIYDVYGTLEEELELFTEAIDRWDTKSMDQLPDYMKICYEALLNVFSEIEEKVAKEGWSYRVHYG  
KDAMKVLVHAYFNEAKWFHENHIPTMEEYMQVALVTSGYSMLTTVSFIGMGDMVTKQAFDWWFNHPKIIRASETIGRLMDDVKSH  
KFEQERGHAAASGVECYIRQYGLSEQEVYKEFHMQVVNAWKDINEECLAAPMPLLERILNLSRVIDVIY

>Pt0017s06920

FDAVTKTSLHATALSFRLLRQHGFVVSQEAFFGGFKDQNGNFMENLKDEDIKAILSLEYASFLALEGENILDEAKVFAISHLKELSEEKIGK  
DLAEQVNHAELEPLHRRTQRLEAVLSIEAYRKKEDADQVLELAILDYNMIQSVYQRDLRETSRWWRRVGLATKLFHARDRLIESFY  
WAVGVAFEPQYSDCRNSVAKMFSVVTIIDDYDVYGTLELELFTNAVERWDVNAIDDLPDYMKLCFLALYNTINEIAYDNLKEKGE  
NILPYLTKAWADLCNAFLQEAKWLYNKSTPTFDDYFGNAWKSSSGPLQLVFAYFAVVQNIKKEEIEENLKKYHDIISRPSHFRLCNDL  
ASASAEIARGETANSVSCYMRTKGISEELATESVMNLIDETWKKMNKEKLLFAKPFVETAINLARQSHCTY

>Pt0019s01270

ENTETVHDLYATALEFRLLRQRGYHVPQEVFNHFKDEQGNFRACIHDDLKGMNLNLYEASYFLVDGENILEDARDFTTKNLENYVKK  
CNTTEYLSELVSHALELPLAWRMLRLEAHWFINLYETKTDMEPVLELAKLDFNMVQAVYQEDLKDSSRWWKMTGRGEKLDLFARD  
RLVVYLLWSVGIIFEPQFGNIRRMITKLNLSLITIDVDYDVYGTLELELFTDAVVRWDLNFMHLPDYMKLCFFALFNSINEIAYDILR  
DQGVNDLPYLKKTWADLCKSHLLEAKWYYSGYTPTLQEYLDNAWISVGAPLAIVHAYFYASNPTTKEASHFMEEYPDIIRWSSILRL  
ADDLGTSSDEMKRGDVSKSIQCYMYESEASEEEARDHIRKLISNAWKKINAYQFHISQTIIGVVVNLARAAQCIIY

>Pt0019s01290

TVHDLYATALEFRLLRQRGYHVPQEVFNHFKDEQGNFRACIHDDLKGMINLYEPSYFLVEGENILEDARDFTTKNLENYVKKCNTTE  
YLSELVSHALELPLAWRMLRLEAHWFINLYETKTDMEPVLELAKLDFNMVQAVYQEDLKDSSRWWKMTGLGEKLDLFVRDRPMV  
WDVNFMDHLPDYMKLCFFVLFNLNEIAYDILRDQGVDSLPLKKAWIYTNAWISATSLAIVHTYFYASNPTTEEASHFMEEYPDIIR

---



---

WSSIILRLADDLGTSSDEIKRGDVSKSIQCYMHETQASEEEARDHIKKLISNAWKKLNASQFHISQTIIGVAVNLPRTAQCIY

>Pt0019s01320

LLEKHDFDLYTVSLLFRVLRQHGFKMPCVVFDKFKDTNGEFKKTIIINDVKGILSLYEASLLSVHGEQVLDEALVFTKANLESLAMQSN  
PRLADHIRNALIRPFHKGVPRIEARKYISFYEEEEESRIDTLLKFAKIDFNRVQLIHRQELSILSRWWNDLNFSEEFYARDRIVEIYFWAN  
GIHFEPQYAFSRMMVTKYTKIVSLVDDTYDAYASFEEIQHFTNAIERCSMNAIDQLPDYMKVLYRALLNLFNETENDMGKQGRYYAS  
YYVKEAFKELVRGYHAEAEWADKCHVPTFDEYVRNGLATSAYGVIMAASFLGMEEVAGGEEYEWLKSNPKIIKAGKMIGRLMNDI  
VGHEDEQKRGDCASGVECYMKQYDVSEKKAIEEIQKMDVNAWKDINEDCMNAPMLLLQHFNLRVTDVIY

>Pt0019s01340

ENTKTVHDLYATALEFRLLRQHGYKVPQEVFNHFKDEQGNFRAWIHDDLKGMFLYEASYFLVEGESILEDARDFTTKNLEKYFKKC  
NPSEYLSKMVSHALELPLAWRMLRLESNWFINVYETKTDMEPVLLELAKLDFNMVQALHQEDLKHSSRWKRTGLGEKLDFAADR  
LVENFLWTVGVIFEPQFGNCRRLTKVNSLITIDDVYDVYGTLDLELELFTDAVVRWDLNFMDRLLDYMKLCFLAFYNSVNMETYDI  
LKYQGVDILPYLKKAWADLCKSYLLEAKWYFSGYTPTLQEYMENAWISISAPVILVHAYFYVSNPTTEEASQFMEEYPDIIRWSSMILR  
LADDLGTSTDELKRGDISKSIQCYMHEAGVSEEKAREHIRNLIENTWKKINDYQFRISQTFIGIAINLARMAQCMY

>Pt0019s03350

LLEKHDFDLYTSLFRVLRQHGFKMPCVVFDKFKDNNGEFKKTIIINDVKGILSLYEASFLSVHGEQVLDEALVLTKNLESLAMQSSP  
RLAHHIRYALIRPFHKGVPRIEARKYISFYEEEEESRNDTLLKFAKIDFNRVQLLHRQELSILSRWWNDLNFSEEFYARDRIVEIYFWAN  
AIHFEPQYAFSRMMVTKYTKIVSLDDTYDAYASFEEIQHFSDAIERCCMDAIDQLPEYLKVLVYRALLNLFNETESDMGKQGRSYASY  
YVKEAFKELTRGYQVEAQWADVGHVPPFDEYVPNGLETTGYGVIMAASFVEMDEVAGEEYKWLKSNPQIMKAAKMIGRLMNDIV  
GHEDEQKRGDCASGVECYMKQYDVSDKKAIEEIQKMOVANGWKDINEDCMNAPMLLLQHIVNLARVTDVY

>Pt0019s03980

ENTETVHDLYATALEFRLSRQRGYHVPQEVFNHFKDEQGNFRAWIHDDLKGMNLNLYEASYFLVEGENILEDARDFTTKNLENYVKK  
CNTTEYLSELASHALELPLAWRMLRLEAHWFNLYETKTDMEPVLLELAKLDFNMVQAVLQEDLKDSSRWKMTGLGEKLDFAADR  
RLMENFLWSAGIIFEPQFGNCRRLTKLNSLVTTVDDIYDVHGTLDLELELFTDAIVRWDLNFMVDPDYMKLCFFALFNSINEVAYDI  
LRDQGVDSLPLYLKKAWADLCKSYLLEAKWYYSGYTPTLQEYLDNAWISIGVPLAIVHAYFYAPNPTAEEASHFTEEYYPDIIRWSSMIV  
RLADDLGTSSDEIKRGDVSKSIQCYMHETEASEEEARDHIKKLISYAWKKLNASQFHISQTIIGVAVNLPRTAQCIY

>Pt0019s03990

---

---

LLEKHDFDLYTVSLLFRVLRQHGFKMPCVVFDFKFKDTNGEFKKTIIINDVKGILSLYEASFLSVHGEQVLDEALVFTKANLESLAMQSN  
PRLADHIRNALIRPFHKGVPRIEARKYISFYEEDESRIDTLLKFAKIDFNVRVQLIHRQELSILSRWWNDLNFSEEFYPYARDRIVEIYFWAN  
GIHFEPQYASSRMMVTKYTKIVSLMFRKNGIFCLNFRCSMNAIDHLPDYMKVLYRALLNLFNETENDMGKQGRSYASYVVEAFK  
ELVRGYHAEAEWADKCHVPTFDEYVRNGLATSAYGVIMAASFLGMEEVAGGEEYEWLKSNNPKIICAGKMIGRLMNDIVGHEDEQK  
RGDCASGVECYMKQYDVSEKKAIEEIQKMDVNAWKDINEDCMNAPMLLLQHFNLRVTDVVY

>Pt0019s06190

LLEKHDFDLYTSLFRVLRQHGFKMPCVVFDFKFKDTNGEFKKTIIINDVKGILSLYEASFLSVHGEQILDDALVFTKANLESSAMQSSP  
RLADHIRNALIRPFHKGIPRIEARKYISFYEEDESHMDTLLKFAKIDFNVRVQLIHRQELSILSRWWNDLNFSEEFYPYARDRIVEIYFWAN  
AIHFEPQYAFSRMVVTKYTKFVSLDDTYDAYASFEEIQHFTNAIERCCMDAIDQLPEYLKVLRYRALLNLFSETESDMGKQGRSYASY  
LKEAFKELARAYQVEAQWADEGHVPTFDEYVRNGLATSSYGVTTAASFVEMDEVAGREEYEWLNSNPKIICAGKMIGRLMNDIAG  
HEDEQKRGDCASGVECYMKQYDASEKKAIEEIQNMVANGWKDINEDCMNAPMLLLQHIVNLVRVTDVVMY

>Pt0019s06220

LLEKHDFDLYTSLFRVLRQHGFKMPCVVFDFKFKDTNGEFKKTIIINDVKGILSLYEASFLSVHGEQILDDALVFTKANLESSAMQSSP  
RLADHIRNALIRPFHKGVPRIEARKYISFYEEEEESRNDTLLKFAKIDFNVRVQLIHRQELSILSRWWNDLNFSEEFYPYARDRIVEIYFWAN  
GVHFEPQYAFSRMVVTKYTKIVSLLDDTCDAYASFEEIQHFTNAIERCCMDAIDQLPEYLKVLRYRALLNLFSETESDMGKQGRSYALY  
YVKEAFKELARAYRVEAQRADDEGHVPTFDEYVRNGLTTSAYGVITAVSFVGMDEVAGQEEYKWLKSNPKIMKAGKMICRLVNDIVG  
HEDEQKRGDCASGVECFMKQYDVSEKKAIEEIQKMOVANGWKDINEDCMNAPMLLLQHIVNLVRVTEVTY

>Pt0092s00200

DNREMKQDLYATSVEFRLLRQHGYNVPQDVFNFSFKDEQGNFKNCLRDDVKGMLNLYEASYLVNGESILEEARDFSEKHLKEYSKE  
QNEDHYLSLLVNHSLELPLHWRMQRMEARWFIDAYGRKRDLNPILLEFAGLDFNMVQAKYQEDIRHASRWWTSMDLGNKLFYTR  
DRLMENTLWTVGEEFEPQFGYYRKMATRVALITLDDAYDVYGTLEELEVFVDVIESWDINALDQLPYMKISFFALFQSINEIGYNI  
LKEQGINVPSMKKLWGDLCRAFLKEAKWYAGYPTLQEYLDNAWLSISGQVILGHAFLLVTNQLTEEAVRCCMEYPLDIRHSSTI  
VRLADDLGTSSDEIARGDNPKSIQCYMHETGATEQEAREHVRYLIHETWKKLNAEILPFSKKFMGIPMDLARTAQSFY

>Pt0121s00250

FDLSTVSLFRVFRQHGFKMPCVVFDFKFKDTNGEFKKTIIINDVKGILSLYEASFLSVHGEQVLDEALVFTKANLESLAMQSNPRIADHI  
RNALIRPFHKGVPRIEARKYISFYEEDESRNATLLKFAKIDFNVRVQLIHRQELSILSRWWNDLNFSEEFYPYARDRIVEIYFWANGIHFEPQ

---

---

YAFSRMMVTKYTKIVSLVDDTYDAYASSEIQHFTNAIERCSMNAIDQLPDYMKFKELVRGYHAEFEWADKCHVPTFDEYVRNGLA  
TSAYGVIMAASFLGMEEVAGGEEYEWLKSNPKIHKAGKMIGRLMNDIVGHEDEQKRGDCASGAECYMKQYDVSEKKAIEEIQKMDV  
NAWKDINEDCMNAPMLLLQHFVNLIRVTDVIY

---

*Sorghum bicolor*

>Sb01g015070

FSTLHEAALRFRLLRTHGLWVSPDELSKFRGDDGSFRTEIMNDHRCLLSLYNAAHLLTHGEVELEEAILFARQHLELGLLTSSLRAPLA  
GQVTRALKLPLPRTLKRLEALDYMSEYTQEQTYNPSILELAKLDFNLLQRLHLKELKAICQWWKDIYQEVELNYMRDRVVECFWWSY  
TVYYEQDHLRARAMLTKIFALLTVVDDTFDDHATLDESRLAEALRRWDNSAVSMLPEYLRKFYLRLLQNFEDFEDELPPNERVVA  
YTREAFQMTSESYLQESEWFHHSCKPKFQEQVNVSTVSIGPQIAATAMLMGMGDEATRDAFEWALRGDTAVMSFGWIARFLNDIAS  
FNSGKSKKDVATSVECYMNEYNTSEVAMTEIGYLIEDGWKTANRARFELLPAVQRIINLTVCMPFTY

>Sb01g021990

ARNSNVKDVDDTAMAFRLRLHGYNVSPSVFKNFEKDGEEFCFVGQSTQAVTGMYNLNRASQIAFQGEDVLHRARIFSYEFLRQRE  
AQGLRDKWIIAKDLAGEVQYTLDFPWAYSLPRVEARTYLDQYGGKDDVWIGKTLYRWYIENCLDTFGVQPQDVLRAFLAASCIYE  
PSRAAERLAWARTSMIANAISTHLDISADKKRLECFVHCLYEESDVSWLKINPNDAILERALRRLINLLTQEALPIHEGQRFIHSLLSLA  
VIEICAGRISEAISVINNKDSDFWFIQLTCNTCDGLNHKVLSSQDAEKNEATINCIDKIELNMQELQLLRSDEKTTNKTKQTLWDVLR  
SYYHCPQHIIIDRHVSRVI

>Sb01g032610

RNESFHEISLQFWLLRQDRYYVSCDVFQSFMDNQQNLNVSLQSDVRALLALYEAHLGTPNEQFLIEAQRQTSSLRSMVDHLEKPL  
ADKVRHALQTPSFRRMKRLEARLYIPLYEEDKEDCDELILELAKLDFYLLQQIHREEVKEICEWYHGLDSPRKLIFYARHRPAEAYFWA  
LGVYYEPQYAKARKLLAKFIATITPYDDTFDNYGMWEELQPFADVMQRWDMKEAEGNECYSDFARFMFGTMIEIENALPKDIGRR  
NVNFIRDIINEVCKGYVTEIGWRDSKYIPLLEEHLKVTLITCFYWAINCTAFVVFEENVTEEILKWMSKFPQIVKDISIRLMDDIVAHE  
FETERNNVATAVTCYMNEYKTTKEEASDVLWNSVEHAWKSMNHEYLSPSSLLIRVINLARMMETMY

>Sb01g034700

GGGAADDGLHTVALRFRLLRQHGVVWPADVDFDRFKDTTGGFSESLSDDPRGLLSLYNAAHMATPGEQGLDEAIFARRHLESCLKK  
GTLSSPLAEQVCRALDIPLARLPKRLETMHYVVEYEKEEGHDAVLELRLDFDLVRFHLRELKDLWWKDLGYNVKNLYARDRL  
VENYFWTCGVFHEEEYSRARMLFAKTFGLLSLMDDTYDVYATLEECHILNDAIQRWDENSASILPEYMRMFYINLVRNFQGFEDSLQ  
PNEKYRVSYAKQAFKLSSKYLLDEAKWCSEKYAPSFKEHMEVSMSSGFPTLAVVLLMGAGDMATREAFRWAIGVPAVVSASGEVA

---

---

RFRNDIASYKKKNKKDVASSVECYAKEHGTSGEEAAVAIAGMAEHAWRTINRSCMLLPAAQLVVNLTKTLEVIY

>Sb01g035460

NSTCLHDVALRFLLRQHGFWISPDEFNRFKDKNGNFDVDITNDARGLLSLYNAAYLFTHGEAELEEAILFARQHLESMRNNLEYPL  
AQLVNRALHLPLPRTFRRVEALHYISEYKGTPTHNPSLLEFAQLDFDLLQRLHLKELKALSRWWKDLYNEGELTYSRDRVVECYLWS  
YTAYFEKEHTRARMILAKIIALIILTDDTYDVRA TLEECRKFNEAIQRWEESAISLLPDYLLKFKYLKLMNIFKEFEDELEPHEKYRVAFSR  
KAFQILSSNYLQEA EWFHGGYKPTFKDQVKISTVCSGAPFASVGLLVGMGDVATKEALEWAISCTDAVKAF AEVTRFMNDLASFKR  
GKNKNDVDSSVECYISEHGVTTEVAFAKINSLIEEAWKTINRARFELLPAVQRVANITASMPLMY

>Sb01g039090

DVDRVDDVRLMTLSFRLLRQNNYPVSPEVVRSLKDGTGNFKKTLQKDTEGLLSLYEASHLAFEGDHLLDEARVFSTEALRELRPMSH  
PHLRSSVDNALAVPLHWAAPRLQARWFINH YARDSADLSLLHFAKLD FNNVQKLQQQELS RITRWWRNADLSESLPFARDRLME  
CFYFATGVAPEPSLEACREVVAKTFALIVLLDDIYDIYGTDELVMFTDAIERWGTSASEQLPEYMKAIYLTIVSTSNEVAEHVLRQEGC  
DARFLLKAWHDLCKAFLMEAKWHYSNYKPTLHEYLENGWISVSGPLMLIHAFPIIEKGVTPNSIQQLESYPKLVQMVS KIFRLCND S  
ATHSEELKRGDAPSSIAIYMSEN RATEHDARKAMRDLT METWKT V NQDAFRFPLPFANACVNMARISHCIY

>Sb04g001780

HSDDLFDATLAFRLLREAGHDV SADVLRRTDSDGFEKLP LSMDIRGLLSLHDMSHLDIGGEVLLYKAKEFSSKHLASAIRYLEPSLAE  
YVRQSLDHPYHLSLMQYKARHHLTYLQSMPIRDTVVEKLAVAEFQLNKLLHQEQEIQEVKRWWMDLGLVQEIPVVRDQVMKWYM  
WSMTAVQGCSFSRYRVEITKIIALVYVDDIFDLVGTLEELSLFTEAVKVWNMAAADSLPRCMRSCYMALYTVTNEITDMVEKEHGL  
NHVNHLRKAWAVLFDGFMVEAKWLATEQVPTAEDYLRNGVVTSGVPLTFVHIFIMLGDQSIEALIDQMP SVISCPAKILRLWDDMG  
SAKDEAQEGLDGSYMDFYLMENRCGPSDVEAHMRNLIAREWEELNRECLTFSSNLTQTCLNAARMISVMY

>Sb04g001800

HSDDLFDATLAFRLLREAGHDV SANDVQRFTKDSCEF KLP LSKDIRGLLSLHDMSHLNIGGEALLYKAKEFSSKHLASAIRYLEPSLAE  
YVRQSLDHPYHLSLMQYKARHHLTYLQSLPIRDTAVEKLAVTEFQLNKLMHQEQEIQEIKRWWMDLGLVQEIPVVRDQVLKWYMWS  
MTTLQGY SFSRYRVEITKIIALYVDDIFDLVGTLEELSHFTEAVKVWN TAAADSLPSYMRSCYKALYTITNEIADMAKQEHGLNPVN  
HLRKAWVVLFD AFMVEAKWL TMDQVPTAEDYLRNGVVTSGVPLTLVHIFIMLGDQSTETLIDHMPSVISC PAKILRLWDDMGSAKD  
EAQEGIDGSYRDFYLMENRCGPSDAEAHMRS LIAREWEELNRECLTFSSNFTHACLNITRMISVMY

>Sb04g001810

---

---

SNDLFDATLAFRLLREAGYDVSADVLWRFTDNSGEFKLPLSKDIRGLLSLHDM SHMNIGGEALLDKAKEFSSKHLASAIRYLEPSLAE  
YVRQSLDHPYHLSVMPYKARHHLTYLQSLPTRDTAVEKLAIAEFQLNKLHQBEMQEIKRWWMDLGLAQEIPVVRDQVLKWYMW  
SMTALQGYFSRYRVEMTKIISLVYVDDIFDLVGTLEELSLFTEAVKMWNTAAADSLPSYMRSCYKALYTITNEIADMAEKEHGLNP  
ANNLRKAWTVLFDGFMVEAKWLANHQVPTAEDYLRNGVVTSGVPLTFVHIFIMLGDQNSEALIDHMPSPVISCPAKILRLWDDMGS  
AEDESEQEGFDGSYKNFYLMENRCSPTDAEAHMRSIAREWEELNRECLTFSSNFTQVCLNIARMVSVMY

>Sb05g006470

GGDDLFAALQFRLLRQHYNVASEIFNNFMDENGDFKDALRSNVDGLLSLYEAAHLGKSDEDLLRKAIIFTKDCSSLVNNGGQLPK  
PVLQEVLHALDLPTQRRIKRLEAKLYISYENGDESNDIVELAKLNFHMLQQMHRDEVRTISLWYNDLNPSSLGPYMRKRPVECY  
YWALGIFYEPQYAKARIVLTKLLTLLTMFDDIIDSYGTMEEVHLFNQAVQSWNEEAAKQIGDGYWYLIFHISKTLLEEFVSKDGGSPMA  
IDCFKETLKAGSKAMVQELVWREEGQVPTVHEYLKQGA AVSILYWP IAVISFAGMFPSDDEIFTWAGSYPKIESSTLCRLMDDVAG  
HENEEERSKCVTAVECYVREHGVTVQEAQALTCLVDEQWRCINQELYAVPIALLDPVLDLVRVMEEVY

>Sb05g019210

EILRSEELHIVALRFRLLRQHGGFFVSTDVDFEFRDGTGNFNTCLTRDPKGLLSLYNAAYLAVPGEVDLDGVIAFTRTHLEAMKGNLTSP  
IADQICRALDIPLPRYMPQLETMHFITEYEQEDGHNATLLELARLDYCLTRSAQLKELRTFCLWWKDFYKNVNLTYSLDRGVEMYFYW  
GFGVFPGEGRSRARIIFSKIVALISLMDDTFDTHATFEDCKNLDEAIQRWDESATSILPEYLRMYTKMLSCFNEFEDILEPKEKYRPVY  
VQKAVMLQSKYYLEEAKWCNEKYMPTFKDQIELSSLSSTIPVLTALAALMAAGNEATKEALEWASVVPDMKGRKNKNDVASSLDCY  
MNEHGTTGTEAAAALSAMVEHAWRRINKAFMEIDRALLRAAVINQARTNEVVY

>Sb05g022320

ATDVLSLFAEESRFHDSVEGHMNDTKALLELYKASLVEYALNLPFYATLQPFKHKRNICFCGTEGIRIHKSAYLACDATENILALAIED  
FHLSQSIYQQQLQYIERWVKEVRLDQLKFARDLPLSLFVFLATNVFPCELYDASIAWTQKCILTTVVDDFFEGGGSTKELRNFVTLIEK  
WDMHAGIECSEDIEILFRAVYDTNNQIAAIGAKLQNRVIDHIVEIWWKYVRTLMIEAEWTTKGHVPTMEEYMSVAETSSALGPVVVP  
SLYLVGPKLSDDMIRDPEYKNLLRYLGIGIRLINDIGTYEKEMSEGYVNSVLLRAFDSSIEAAKREIHVLLANSQRELLKLVLPPIRPCDI  
FWNTYKIGRQFY

>Sb06g002820

KDHTYDNIAFTALKFRLLRENGFPEGQLGYHNYGNCTTKTPRQEDVNTLLLLHEASYLAFGDEEILDVARTYSAKALKELMPSMLPH  
LREAVAHALEIPLHWRAPRLETRWFIDYYARDINMCPLLLQFAKLDFNQVQDEHQKDLAAVTWWWRNIGLGEKLPFARDRLMECF

---

---

HYANGIVWDPKLGPCRQMLAKVSNLIVHLDDVYDVYGTMDDELVLFTNAIARWDAIPNERLPEYMKALYSVIYHTSNEVAEHALKE  
HGCSMHYHLQKLWHDICMAFLLEAKWHHGNCRPSIQKYLENGWVSSSAPLLLLSHAFSMLHSVINMNTISKMQTTHRLVQQVSLIFR  
LCNDSATHMDELQRGDAPSFIAINMAENGNEDDSRKVMQDLILKSWKVINEEAFQYSTPFNKACVNLARISHCVY

>Sb06g028210

RDEEIMLDAATCAMAFRILRMNGYDVSSDELYHVAEASMFHNSLGGYLNDTRTMLELHKASTVSTSEDEYILDTIGSWSSTLLREQLG  
SGGALRRTPLFREVEHALDCPFYTTLDRLDHRWNIENFNVTGHRMLETPLYSSRHTSRDILTAVRDFSSSQFKYQQELKHLESWVKE  
CKLDQLPFARQKLAYFYLSAAGTMFPPELSDARILWAKNGVLTTVVDDFFDVGGSKEELENLLLLVEMWDEHHKIEYSEQVEIVFSSI  
YNSVNQLGAKASLLQDRNVTKHLVQIWLDLLKSMTEVEWRMSKYVPTEEYMANASLTFALGPIVLPPLYFLGPKIPKSAIKDPEY  
NELFRLMSTCGRLLNDVETFEREYNEGKLNVSLLVLHGSMSSIDARRKLQKPIDTCRRDLLRLVLVIPRCKELFWKMCKVCYFFY

>Sb06g028220

KDEEIMMDKATCAMAFRLLRMNGYDVSSDVLHVAGPSTFHDSLQGYLNDTKSLELYKASKVLSSENDLVLDGIGFWSGNLLKDK  
LCSSRVKDLIFEMEYAVKFPFYATLERLEHKNRNFDAWGPLMLTTKSSSFCIDQEFVALAVEDFSFSQYVYQDELRLHDSWVKENKLD  
QLQFARQKLTICYLSAAATIFSSSELSDARISWAENGLTTVVDDFFDVGGSKEELENLIALVEKWHAHHTVGYSEQVKIVFSAIYTTV  
NHLGVIASAAQGRDVTNHLVEIWLDLLRSMMVETEWQRSQYVPTVEEYMTNAVVSFALGPIVLPALYFVGQEVLEHAVEEYDELFR  
LMSTCGRLLNDSQSFEREQNQGKLNVSLLVRHSGMSIEAAKKALQKSIDVSRRDLLRLVLVPRCKELFWKMCKILHLFY

>Sb06g031270

LHDVALRFLLRQQGFVWSPDEFNRFKDKHGNFDVGITNDARGLLSLYNAAHLFTHGEAELEEAILFARQHLESMRNNLEYPLAQQ  
VNRALLVPLPRTVRRLEALHYISEYKESPAHDPSSLLEFAQLDFDLLQRLHLKELKALSRYNQYLAIKIVLTFGLNNVNTTHRYCSAAY  
YEKEHSRARMILAKIIALIILIDDTYDVRATLEECRKFNEAIQRWEESAISLLPDYKTFYKLMNIFKEFEDELETHEKYRVAFSRKAQFI  
LSSNYLQEAWEFHGGYKPTFEDQVKISTVCSGAPFASVGLLVGMGDVATEEAELEWAISCTDAVKAFAEVTRFMNDLASFKHGKKNK  
DVDSSVECYISEHGVTTEVAFAKINSLIEDAWKTINRARFLPVVQRVANITASMPY

>Sb07g003080

GASASSHDLYVTSLRFYLLRKHYTVSSDVFAKFRDEQGNISSDDDMTTLMMLYDAAHMRTRGEDILDNIIVFNKSRLTVVKSENLE  
PDLAEEVTITLETTRFRRAERVEARRFISVYEKKATRDDTILEFAKLDYNIVQAVYCDLQQLSMWWKDLRSQVDMTFSRDRLEVEMYF  
WMTVIVYEPDYSRIMLTKLVLYIALDDIYDNYSTTDESNIFFTAFKRWDDKAVEEIPQHLRNFYKSVIRTADEIVAELKVQNNKNS  
EVVREVMFHVAESYHAEVKWRDEQYVPADVDEHLQISLGSIMAMQVVVLTFSMGMGDVTTREIIDWAFTYPRMIRAVTAMARILNDI

---

---

MSYEREQASDHMASTVQTCMKQYGVTVEEAIEKLFICEEAWMDIVQGCLYPMAILHKVSVVGRSLDFIY

>Sb07g004470

DVKDLNLVSLRFYLLRKNGYDVSSDVFLNFKDKDGNFASDDIRSLLSLYNAAYLRTHGEEVLDEAIIFTRRHLEAALTSLESKLADDEVSLSLQTPFRFRRVILETRNYIPIYEMEPSRNEAMLEFAKLNFNLLQILYCEELKTVTAWWKQLNIETDLSFIRDRIVEMHFWMAGACSEPKYLSRVILTKMTAFITILDDIIDHSTTEEGKLLAKAIDRCSQDANEVLPDYMKHFYMFLLKTFDSCDELGPNKRYRLKILVRGYSQEI EWRDEHYVPETIDKHLEISRVTVGAFQLACSSFVGMGDIITKEVLDWLLTYPELLKCFTTFVRLSNDITSTEHSTTMHDACEKIKGLIED SWKDMMQLYLEQSKVVAQTVVDFARTGDYMY

>Sb07g004480

DDKDLNLVSLRFYLLRKHGYVSSDVFTSFKDKEGNFVADDTKCLLSLYNAAYLRTHGEEKVLDEAIIFTRHQLEALLDSLESTLADDEVSVTLQTPFRFRRVILETRNYIPIYEKEAARNEVILEFAKLNFNLLQLIYCEELKKVTLWWKQLNVETNLSFIRDRIVECHFWMTGACFEPQ YSLARVISTKMTACITILDDIMDTYSTTEEAMLLAEAIYRWEENAAELLPEYMKDFYLKLLKTIDSCDNELGPNKSFRTFYLKEVLKVLV RGNQSQEIWRNENYVPETINEHLEHSGRSVGAFQVACSSFVGMGDNITKEILEWFLTYPELLKSFTTIARLSNDIASTKREQNVGHHVSTVQCYMLKHGTTMDDAYEKIKELIEDTWKDMMELYEQPKLVTQTVVDFARTADYMY

>Sb07g004485

DDKDLNLVSLRFYLLRKHGYDVSSDVFKCFQDKEGNFVVKDTKSLLSLYNAAHLRIHGEEVLDEAIIFTRGKLESVLDLSLETTLADDEVTLALQTPFRFRRVILETRNYIPIYEKEVARNEVILEFAKLNFNLLQLLYCEELKMITLWWKQLNVETNLSFIRDRIVEMHFWMTGACSEK KYSLTRTITTKMTAYITILDDIMDTHSTTEEAMLLAEAIYRCEENAAELLPEYMKDFYLKLLKTIDSVKHELGPNSFRVLYLKELLKILV RGYSQEIWRDEHYVPETIDEHLEVSKATVGAFQVACSSFVGMGDIITKEILDWLLSYPKLLKSMTTTFVRLSNDIASTKREQTGHHAS TVQCYMMQHGTTHHDACEKIKELTEDTWKDMMKLYLEQPKVIIQTVLDFARTAEFMY

>Sb07g005130

QDLDLPTTSHLFYLLRKHGYHISSDVFLKFRDDKGNIVTDDARCLLLMYEAAHLRVKGEEILDNILIFTKSQLQCIVDDLEPQLKEEVK YALETPLFRRLKRVQTRQYISIEKNTAHNNMLLEFSKLDNFNLLTYCEELKDLTLWWTEFQTQANTSIYARDRMVEMHFWMMGVF FEPQYSYSRKMLTQLFMIVSILDDLYDNHCTTEEGNVFTAALERWDEEAVEQCPTYLRTLTVNLTVAIEEWLNLQNNKHAKLVK RLIIIDMAKCYNAETEWDRDKKYVPATVDEHLKISARSSGCMHLVSQGFISMGDVATSEAIKWASTYPKIIQAVCIARLANDIMSYPKREE TSQNMVSTVKTCAKEYGTTVAQAIEKLRELIEEAWMDITEECLQPKVLLERVANLARTMDFLY

>Sb07g020980

---

---

NSSSLHEVALRFLLRQQGFVWSADEFEFKFNEDGSFISGITNDPKGLLSLYNAAHLLTHDEEILEDAILFSRQHLELIRSSLKSPLAEQV  
GRALEIPLPRTLKREETISFIPEYSIQDQTYSPVILELAKLDFNLLQHLHQKELKEISQWWKELSGEIGLDYVRDRIVECYFWSYTVHYEQ  
ENARARMILARLFLLTSLDDTYDVHATLEEARELNKAIERWDDNDVSLPEYLKEFFVKVISNFRFEFELESHEKYRNVYNIKGFQT  
LSKYYLQEAWEFHGTYPSFKDQVNVSVITAGGQVLSIGLLVGMGEATKEAFEWATGDTDAIWACGQVSRFMDMMSAFKNGRNN  
MDVASSVECYMKERNVPSEVALATISSFVEDAWKTINQAKYPTLLPVVQRVTSLAKSMTLLF

>Sb07g025700

DNFHGSNDLHVVALRFGLLRQHGLWVSADVFDKFRDAMGSFSMDLATDSKGLLSLYNAAHMAVPGEAVLDDAVAFARRHLEAA  
KGLLIRSPMVEQVSRALNTPRPRWRPRRLEAMHYITEYEQEDEHNAIILELARLDFSIVRSVYIEEIKNLSLWWRDLYNDVKLPYARNRI  
VETHLFSSGVFPEKEHSRARIIFTKTFAFLSLMDDTYDTHATLEECQKLTEAIQRHEYLRFYIKLLRNYKEIEEDILEPWEKNRMAADF  
KSFKLVSLSYLKEAEWFQNYTPSFKEHIDFSITSTGLPMLSHVALMGAGQLATKEAFDWALDMPDLVKGMAETGRFFNDISSYKPR  
NSLKDVVSSLECYMKEHDMTPNDATVAFETMVEHAWRRINKAYMELDHGILPAVVNMARTVQMFY

>Sb09g000990

SDYDLGTVALWFCLLRKHRYRVSSDVVFRFKDEKGGFLVDSPODLLNLYNAAHMRTHGEVILEKAILFSQRRLETMIPYMEGSLLAEI  
KSALEIPLPRRVRIYELKYYISTYEKDATVHEKVVQLAKLNSNIMQLHHQHELGIITSWDSKGAHDLPECMKFALEKIFDSYETIENML  
HQEEKYRMAYLRYFVKDLVRSYSKEVKMLQEGYIPKSVEEHLKVSVITTTCPFLSCASFVGMHDIATKDFFDWVSSVPMVQELSVILR  
LVDDLGSYEREQLIPHVASTINSYMKEHNVSIEVARGQIQVLKEKSWKDFNSEWLAYPKQLLERIFNFTRTMEFIY

---

*Solanum lycopersicum* >SITPS10

KQNDNDNNLYVVSRLFRLVRQQGHYMSSDVFKQFINQDGKFKETLTNDVQGLLSLYEASHLRVRDEEILEEALTFTTTTHLESIIVSNLS  
NNNSLKVVESEALTQPIRKTLPRVGARKYISYENNV AHNHVLLKFAKLDFNVLQKLHQRELNELTRWWKDLDFANKIPYARDRL  
VECYFWILGVYFEPKYSRARKMMTKVLKITSVIDDTFDAYATYDELVAFTDAIQRWDASAIDSISPYMRPLYQALLDIYSEMEQVLSNE  
GKLDRVYYGKHEIKKIVRAYFKEAQWLNDANYIPKYEEHMEISLVTAGYMMGATNCLVGVVEEFISKDTFEWLKNEPLIVRAASLISRA  
MDDIVGHEDEQKRGHVASIIECYMKEYGASKQEAYAKFKKEVTNVWKDINKEFFRPTEVPMFVLERALNFARVIDTLY

>SITPS12

KQNDNDNNLYVVSRLFRLVRQQGHYMSSDVFKQFINQDGKFKETLTNDVQGLLSLYEASHLRVRDEEILEEALTFTTTTHLESTVSNLS  
NNNSLKAEVTEAFSQPIRMTLPRVGARKYISYENND AHNHLLLKFAKLDFNMLQKLHQRELSLTRWWKDLDFANKYPYARDRL  
VECYFWILGVYFEPKYSRARKMMTKVIQMASFFDDTFDAYATFDELEPFNNAIQRWDINAIDSVPPYLRHAYQALLDIYSEMEQALA

---



---

KEFKSDRVYYAKYEMKKLVRAYFKEAQWLNNDNHIPKYEEMENAMVSAGYMMGATTCLVGVEEFISKETFWMINEPLIVRASSL  
IARAMDDIVGHEVEQQREHGASLIECYMKDYGVSKQEAYVKFQKEVTNGWMDINREFFCPDVEVPKFLERVLNFRVINTLY

>SITPS14

NKNEDDNDLYIVALRFRLVRGQRHYMSSDVFKKFTNDDGKFKETLTKDVQGLLNLYEATHLRVHGEQILEEALSFTVTHLKSMSPKL  
DSSLKAQVSEALIQPIYTNVPRVVAPKYIRIYENIESHDDLLLFVKLDFHILQKMHQRELSLTRWWKDLSDHNSKYPYARDKLVECYF  
WATGVYFGPQYKRARRMITKLIVITITDDLYDAYATYDELVPYTNATERCEISAMDSISPYMRPLYQVFLDYFDEMEEELTKDGKAHY  
VYYAKVEMNKLIKSYLKEAEWLKNDIIPKCEEYKRNATITVANQMILITCLIVAGEFISKETFWMINESLIAPASSLINRLKDDIIGHEH  
EQQREHGASFVECYVKEYRASKQEAYVEARRQIANAWKDINTDYLHATQVPTFVLQPALNLSRLVDILQ

>SITPS16

YWIDDLHAIALCFRLLRQQGYRVSCDAYKKFTDDQGNFKIELINDVHGMLSLYEAAQFRVHGEELDEALNFTTTQLKLILPKLSNSP  
LAQQVANALKFPIKDGIVRVEARKYISFYQQNQNHNLQLLNFAKLDNFILQMLHKKELCDITRWWKELEIVKTLPYVRDLAEVYF  
WSLGVYFEPQYSTARKILTKNISMISLIDDTYDIYGTDELTLFTEAIERWNIDASQQQLQPSYMKIYCGLLDVYDEIKKDLANENKSFLI  
NYSIEMKKMVMAYFQEAkWYYGKTIPKMEEYMKSGISTSAYVQVATTSWLGMGNVATKDSFDWIVNEPPIVASSIARLLNDLLSH  
EEEQKRGDAPSGVECYMKEYGVTKEEAHIKIRNTIENSWKDLYEEYFKVNGTIIPRVLLMCIINLARVIEFIY

>SITPS17

YSIGDLHAIALCFRLLRQQGYVSCDAFKKFTNDQGNFKEELVKDVEGMLSLYEAAQFRVHGEQILDEALNFTIAQLKQILPKLSNSQ  
LAQQITNALKYPIKDGIVRVETRYKISFYQQNQNHNEVLLNFAKLDNFILQTLHKKELSDMTRWWKMELVNTLPYARDRLVECYF  
WCLGTYFEPQYSVARKMLTKISFYISIIDDTYDIYGKDELTLFTQAIERWNIDASEQLPLYMKIYRDLLDVYDEIEKELANENKSFLVN  
YSINEMKKVVRGYFQEAkWYYGKKVPTMEQYMKNIGISTSAYILLTTTWSLAMGNVATKDAFDWVATEPPIVASCYIIRLLNDLVSH  
EEEQKRGNAASA VECYMNEYSVTKEEAHIKIRDIENYWKDLNEEYFKVDMIIIPRVLLMCIINLTRVAEFY

>SITPS18

KNEEFSNVTHCAMAFRLLRMSYYNVSSDELAEFVDEEHFFSTSGKFISDVAIHELHKASQLTINEKDDILDKINNWTGIFMQQKLLNN  
DFLDIKSKKEVELALRMFYVTDRAENRRYIESYQENNFKMLKTA YRCGSMNNIDLLTFMSQEFELGLSQYQEEVEQLKRWYEDYRL  
EQVGLAQEYIYRTHLISVAVFFEHEL SNARIMYAKYAMFLTSDDLFEHLASKDELNIIELVQRWDEHTNVGFHSEKVKLFFFTALYDT  
IEEVATNAQIKQGRNVKHHIIELFVEGLNSMLVDRVEWGTRIPSIEEYLRVSLSTFGGKCMVLTSQYVVGIHL CNYQSDDEIQDLCYCS  
GIVMRLNDLQSFKRERSDSRLVNMVKLVMKQRSGTICEEEEEEAIKHIKETIECNRRKLLRMVLQSKGKGSKVPQALKDLFWRTTKA

---

---

VYF

>SITPS19

KNEQIFSNVTHCAMAFRLLRMSYYDVSSDELAEFVDEEHFFATNGKYTSHVEILELHKASQLAIDHEKDDILDKINNWTRAFMEQKL  
LNNGFIDRMSKKEVELALRKFYTTSHLAENRRYIKSYEENNFKILKAAYRSPDINNKDLLAFSIHDYELCQAQHREELQQLKRWFE  
YRLDQLGLGERYIHASYLFGVTIPEPELSDARLMNAKYAMLLTIVDDHFESFASKDECLNIIELVERWDDYASVGYKSEKVKIFFSTFYKS  
IEELATIAEIKQGRSVKNHLINLWLEMMKMLMEQVEWCSGKTIPSIEEYLYVTSITFCAKLIPLTTQYFLGIKISKDLLESDEICGLWNC  
SGRVMRILNDLQDSKKEQKEGSITLVTLMLKSMSEEEAVMKTKEILEMNRRELLKMVLVQKKGSQPLQLCKDIFWRSSKWAHF

>SITPS20

KNEQIFSNVTHCAMAFRLLRMSYYDVSSDELAEFVDEEHFFATNGKYKSHVEILELHKASQLAIDHEKDDILDKINNWTRAFMEQKL  
LNNGFIDRMSKKEVELALRKFYTTSHLAENRRYIKSYEENNFKILKAAYRSPNINNKDLLAFSIHDFELCQAQHREELQQLKRWFE  
YRLDQLGLAERYIHASYLFGVTVIPEPELSDARLMYAKYVMLLTIVDDHFESFASKDECFNIIELVERWDDYASVGYKSEKVKVFFSVFY  
KSIEELATIAEIKQGRSVKNHLINLWLELMKMLMERVEWCSGKTIPSIEEYLYVTSITFCAKLIPLSTQYFLGIKISKDLLESDEICGLWN  
CSGRVMRILNDLQDSKREQKEVSINLVTLLMKSMSEEEAIMKIKEILEMNRRELLKMVLVQKKGSQPLQLCKDIFWRTSKWAHF

>SITPS21

KNEEIFSNITHCAMAFRLLRMSNYDVSSDELAEFMDEEHFFTTSGKYTSHVEILELHKASQLAIDQEKDDILDKINNWTRTFMEQKLL  
NNGFIDRMSKKEVELALRKFYTTYDRAENRRYIKSYEENNFKILKAAYRSPNINNKDLLIFSIHDFDLCQTQHREELQQLKRWFDQR  
LDQLGLSEQFISTTYLIGIAVVSEPEFSNARLMYAKYVMLLTIVDDLFDGFASKDELNIIQLVERWDDYASVGYNSERVKVFVSVFYKSI  
EELATIAEIKQGRSVKNHLINLWLEVMMMLIERIEWWTSKTIPSIEEYLYVTSITFGSRLIPLTTQYFLGIKISKDLLESDEIYGLCNCTGI  
VMRLLNDLQTYKREQGESSMNLVTILMTQSPRRTNICEEAIMKIKEILEMNRRELLKMVLVQKKGSQPLQLCKDIFWRTSKMVFYF

>SITPS24

GEDEIFTSAGTCSMAFRILRGYGYNVSSDPVAQFLEQEYSGHLNDIHTMLDLYQALEMIIATDKPVSMLNSSLQSLIQRLSDEFYPP  
NGLTKQIREQVDDVLKFP SHANIKRVANRRNIKHVDNTRVLKTSYSSSNFGNKDFLTLAVEDFNLCQSIHRNELKQLERWLTQNR  
LDKLFVRERSAYCYFSAAATIFQPELSDARMSWAKNGVLTVIDDFDVGGSMEELNNLILLFKKWDVDVSTDCCSERVGIIFSALHS  
TISEIGDKASKWQARSVTRHITDIWLNLLNAMLREAEWAKDMSVPSLDKYMANGYVSFALGPIFLPALYFVGPKL PDDVVQHPEYHS  
LFELVSTCGRLLNDIRSFERESKDGLNAVTLVTHGNRISEEAAIEGLSHRVEMQRKELLKLVLQREGSVVPNACKDLFWEMSKVL

HQ

---

---

>SITPS25

KTSSTSKDLYATALCFRLLREHGYHASQDMLKDLFDGKGLPLDMKTSLELFEGSHLSIDGENLLNDIRLFSTKNLKNLSLDVDRLTS  
NPLAWRVRWYDVRKHIITAQNCNDTNPMLLKLAKLNFNIIQATHQKDLKDVRWWRNVSIIENLEFTRERIVESFFFVAVGIASEGEHG  
SMRKWLAKVIQLILIIDDVYDIYGTADVQQFTVAIEKWDPEEVQRLPKSIQICFGALHDTMEDISVEIQRQKGGPSVLPHLKQVWVNF  
CKALLVEATWYHKGHIPTLEDYLHNGWTSSGPLLSLHVILGLTNENLHLCCKNCQEIIYYTSLIIRLCNDQGTSTVELERGDVASSIICY  
MHQENVSEDVAREHIESIILNSWEKTNHYHFNRLSTSHRKIMKHVINEARMAHVMY

>SITPS27

KDSDNEMDLYSTALYFRIFRQYGYNVTQDVFLSYMDEMGEKINVDTNMDPKTMMQLFEASHLALKDENMLDEARIFCTNNLKNIIIP  
MEMPLHWKVEWYNTREHISKQANEKEEGVSKLKLQLAKLNFNMVQAEHQKDLVHILRWWRNLGLIENVFSRDRIVESFLWSVG  
VAFEPQHSNFRNWLTAKITFIIVIDDVYDIYGTQLNLQFLTDVVRWDPKVVVEQLPSCMQICFWKLYDITNDVALEIQQKQKCKFPV  
LTYLQKVWAEFCKALLVEAKWDSKGYTPTFSEYLENGWKSSGGTVLSLHVLLGLAQDFSQVDYFLENERDLIYSSLIIRLGNDLGTST  
AELERGDVSSSILCYMRKENVKEDVARKHIEEMVIETWKKMNRHCFENSSPLIKYIMNIARVTHFIY

>SITPS28

HEEDDLYKVALYFRLFRQHGYPISSDCFNQFKDTKKGKFKKTLIDVKGMLSLYEAHVREHGDDILEEALIFATFHLETRITPNSLDSTLE  
KQVGHALMQSLHRGIPRAEAHFNISIEECGSSNEKLLRLAKLDYNLVQVLHKEELSELTKWWKDLDFASKLSYVRDRMVCEFFWTV  
GVYFEPQYSRARVMLAKCIAMISVIDDTYDSYGTLELIIIFTEVVDRWDISEVDRLPNYMKPIYISLLYLFNEYEREINEQDRFNGVNYV  
KEAMKEIVRSYYIEAEWFIEGKIPSFEEYLNNALVTGTYLLAPASLLGMESTSKRTFDWMMKKPKILVASAIIGRVIDDIATYKIEKEKG  
QLVTGIECYMQENNLVSVEKASAQLSEIAESAWKDLNKECIKTTTTSNIPNEILMRVVNLTRLIDVVY

>SITPS3

SEATSANSLYYTALKFRILRQHGFYISQDILNDFKDEQGHFKQSLCKDTKGLLQLYEASFLSTKSETSTLLESANTFAMSHLKNYLNGG  
DEENNWMVKLVRHALEVPLHCMMLRVETRWDYDIYENIPNANPLLIELAKLDFNFVQAMHQQELRNLRSRWWKKSMLAEKLPFAR  
DRIVEAFQWITGMIFESQENEFCEMILTKVTAMATVIDDIYDVYGTLELEIFTHAIQRMEIKAMDELPHYMKLCYLALFNTSSEIAYQ  
VLKEQGINIMPYLTAKSWADLSKSYLQEARWYYSGYTPSLDEYEMENAWISVGSVLMVNAFFLVTPITKEVLEYLFSNKYPDIIRWPA  
TIIRLTDDLATSSNEMKRGDVPKSIQCYMKENGASEEEARKHINLMIKETWKMINTAQHDNSLFCEKFMGCAVNIARTGQTIY

>SITPS31

FEAHEYNDLCTLSLQFRILRQHGYISPFIKIFSRFQDANGKFKESLCCDIRGILNLYEASHVRTHGEDTLEEALAFSTAHLESAAPHLKSP

---

---

LSKQVTHALEQSLHKSIPRVETRYFISIIYEEEEELKNDVFLRFAKLDFNLLQMLHKQELSEVSRWWKDLDFVTTLPYARDRAVECYFWT  
MGVY AEPQYSQARV MLAKTIAMISIVDDTFDAYGIVKELEVYTD AIQRWDV SQIDRLPEYMKISYKALLDLYNDYETELSNDRSDVV  
QYAKERMKEIVRNYFVEAKWFIIEGYMPPVSEYLSNALATSTYYLLTTTSYLGKMSATKKDFEWLAKNPKILEANVTLCRVIDDIATYE  
VEKGRGQIATGIECYMRDYG VSTQVAMD KFKQEMAETA WKDVNEGILRPTPVSAKILTRILNLARIIDVTY

>SITPS32

FEAHDNLNTLSLQFRILRQHGYNISQKIFSRFQDANGKFKESLSNDIKGLLNLYEASHVRTHGEDILEEALAFSTAHLESAAPHLKSPLSK  
QVTHALEQSLHKSIPRVETRYFISIIYEEEEFKNDVLLRFAKLDFNLLQMLHKQELSEVSRWWKDLDFVTTLPYARDRAVECYFWTMG  
VYAEPQYSQARV MLAKTIAMISIVDDTFDAYGIVKELEVYTD AIQRWDISQMDRLPEYMKVSFKALLDLYEDYEKELSKDGRSDVVQY  
AKERMKEIVRNYFVEAKWFIIEGYMPPVSEYLSNALATSTYYLLTTTSYLGKMSATKKDFEWLAKNPKILEANVTLCRVVDDIATYEVE  
KGRGQIATGIECYMRDYG VSTQVAMD KFKQEMAETAWKDVNEGILRPTPVSTEILTRILNLARIIDVTY

>SITPS33

FEAHDNLNTLSLQFRILRQHGYNISPKIFCRFQDANGKFKESLSNDIKGLLNLYEASHVRTHGEDILEEALAFSTAHLESAAPHLKSPLSK  
QVTHALEQSLHKSIPRVETRYFISIIYEEEEQKNDVLLRFAKLDFNLLQMLHKQELSEVSRWWKDLDFVTTLPYARDRAVECYFWTMG  
VYAEPQYSQARV MLAKTIAMISIVDDTFDAYGIVEELEVYTD AIQRWDISQIDRLPDYMKISYKALLDLYDDYETELSKDGRSDVVHYA  
KERMKEIVRNYFVEAKWFIIEGYMPPVSEYLSNALATSTYYLLTTTSYLGKMSATKKDFEWLAKNPKILEANVTLCRVIDDIATYEVEK  
RGQIATGIECYMRDYG VSTQVAMEKFKQEMAETAWKDVNEGILRPTPVSTEILTRILNLARIIDVTY

>SITPS35

SEAQYNDLQTSSIQFRLLRQHGYNISPKLFSRFQDAKGFKNESLSNDIKGLLNLYEASHVRTHGEDILEEALAFSTAHLESAAPHLKSP  
LSKQVTHALEQSLHKSIPRVETRYFISIIYEEEEQKNDLLL RFAKLDFNLLQMLHKQELSEVSRWWKDLDFVTTLPYARDRAVECYFWT  
MGVY AEPQYSQARV MLAKTIAMISIVDDTFDAYGIVKELEVYTD AIQRWDISHIDRLPDYMKISYKALLDLYDDYETELSKDGRSDVV  
HYAKERMKEIVRNYFVEAKWFIIEGYMPPVSEYLCNALATSTYYLLTTTSYLGKMSANKDFEWLAKNPKILEANVTLCRVIDDIATYD  
VEKGRGQIATGIECYMRDYG VSTEEAMEKFEEMAETAWKDVNEGILRPTPVSTEILTRILNLARIIDVTY

>SITPS36

KQNDNDNNLYVVS LRFRLVRQQGHYISSD VFKQFMERD GKF KTLNNDVQALLSLYEA AQIRVRGEDILEEALFTTTTHLES MIPLLS  
DNPLKAQIIEALTHPIHKVIPRLGARKYIDIYENMESHN HLLLKFSK LDFNMLQKQH QRELS ETSWWKDL DLASKVPYARDKLVEG  
YTWT LGVYFEPQYSRARRMLVKVFKMLSICDDTYDAYATFDEL VLF TNAIQRWDINAMDSLPPYMRPFYQAILDIFDELEEEELTKEGK

---

---

SDRVYYGKFEMKKLARAYFKEAQWLNAGYIPNCDEYIKNAIVSTTFMALGTTSLIGMEEFITKDIFEWITNEPSILRASSTICRLMDDIS  
DHESDQQRGHVASVIECYTKEYGASKQEAYVKFRKEVKDAWKGINCALLRPIEVPIFVLQRILNLARTMDTFF

>SITPS37

CFLKYQNHHDISLCFRLLRQEGYHVSADVFKKLKNNDGTFGLNLNQDVNGLIGLYEASQLGVEGEYILDEIAKFSGDHLNACLAN  
SDEARIKETLKYPYHKSLSRWKNKSFINNFKGINGWGKNTLKELANMDYFITKEIHQHELAQVFRWWKSLGLAEELKLLRDQPLKW  
YTWPMAMLTDPKMSQERIELAKCISFVYVIDDIFDVYGTIEELTLFTQAVHRWELSAMMDLPEYMRSLYKALYNTINSIGYNIYKIYGQ  
NPTQNLQNTWAHLCSAFLIEAKWFACGMVPTTDEYLKNGLVSSGVYVALIHLFYILGLGVSSMHLQDISLMSTSIKILRLWDDLGS  
KDENEQEGKDGSYVEYMKENKDSSMELAREHVIKLIEDWKQLNKEHFCLMSQSTRSFSKASLNSARMVSLMY

>SITPS38

KRDHNEELYDTALEFRLLRQHGYHLPQEIFCSFMNEEGKFKTALVEDTKGLLSLYEASLYCMEDENIMENARDFATHYLMENVKK  
KMDEQVSHALEMPVHWRMERLEARWFIEIYHKKENMNPLLELAKLDYNMVQATYLEELKQMSRWDKNMKLVKMSFVRDRLV  
EGFFWAVGFTPNPQFGYCRKLSTKLSVLLTTIDDIYDVYGTLELELFTDIVDRWDINAIEQLPEYMKISFLALFNSMNELAYDILKEQG  
FSIISHIRKQWANLCKAYLLEVWKYQRGYTPSLDEFNRNAWITNTGPVLMHAYFCITNPIKEDELQRLNHYPPIIYSPSLILRLANDLA  
TSPDEIKKGDYLSIQCYMHDSKSCENARNYIKKLIDETWKKMNRDILRDESLSKDFRRTSMNLARIAQCMY

>SITPS39

CFLKYQNHHDISLCFRLLRQEGYHVSADVFKKLKNNDGTFGLNLNQDVNGLIGLYEASQLGVEGEYILDEIAKFSGDHLNACLVNS  
DEARIKETLKYPYHKSLSRWKAKSFINNFKGINGWGKSTLQELANMDYSITKEIHQHELIQVSRWWSSLGLAEDLKLLRDQPLKWYT  
WPMTMLTDPKMSQQRIELAKCISFVYVDDIFDVYGTIEELTLFTQAVNRWELCVMKDLPEYMRATYKALYDTINSIGYNIYKIYGQN  
PTQNLRNAWANLCAFLKEAKWFASGELPTTDEYLKNGLVSSGVHVVLVHMFYLLGFGLNNQNSIYLEDSSAMASSVATILRLWD  
DLGSAKDENEQEGNDGSYIECYMKGQKNASIELAREYVVKLIEDWKQLNKKHFNLNMGSLGYSYKASLNLARMVPLMY

>SITPS4

CRDNSLYSTALKFRLLRQHGFHISQDIFNDFKDMNGNVKQSIKNDTKGELLEASFLSTECETTLKNFTEAHLKNYVYINHSCGDQY  
NNIMMELVVHALELPRHWMMPRLETRWYISYERMPNANPLLELAKLDFNIVQATHQQDLKSLSRWWKNMCLAEKLSFSRNRLV  
ENLFWAVGTNFEPQHSYFRRLITKIIVFVGIIDDIYDVYGKLELELFTLAVQRWDTKAMEDLPYMQVCYLALINTNDVAYEVLK  
HNINVLPLYLTKSWTDLCKSYLQEARWYNGYKPSLEEYMDNGWISIAVPMVLAHALFLVTDIPITKEALESNTNYPDIIRCSATIFRLND  
DLGTSSDELKRGDVPKSIQCYMNEKGVSEEEAREHIRFLIKETWKFMTAHHKEKSLFCETFVEIAKNIATTAHCMY

---

---

>SITPS40

ARNSPVQDIDDTAMAFRLRLRHGYAVSADVFKHFESKGEFFCFVQSNQAVTGMYNLYRASHVMFSGEKILENAKIFTSNYLREKRA  
QNQLLDKWIITKDLPGEVGYALDVPWYASLPRLETRFFLEHYGGEDDVWIGKTLYRMPLVNNSLYLELAKSDYNNCQALHQFEWRR  
IRKWYYECLGEGFLSEKRLLVTYYLGSASIFEAQRSTERMAWVKTAALMDCVRSCFGSPQVSAAAFCEFAHYSSTALNSRYNTEDR  
LVGVILGTLNHLSSALLTHGRDIHHYLRHAWENWLLTVGEGEGEGGAELIIRTLNLCSVHWISEEILLSHPTYQKLEITNRVSHR  
LRLYKGHSEKQVGMLTFSEEIEGDMQQLAELVLSHSDASELDANIKDTFLTVAKSFYY

>SITPS41

ARNSNICEVDTTCAIRLLRLHGFVSPDVLHKFKDGDEFFCLRGESNKSATVMFNLYRCSQALFPGEIICEEAKNFTYNFLHQYLAN  
NQSKDKWVIAKDIPGEIRYALEFQWYASLPRVESRLYIDQYGGADEIWISKTLYRMPDVSNNVYLEAAKLDYNRCQSQRHFEWLIMQ  
EWFEEKGNFQKFGISKKEVLVSFFLAASSIFEVEKSRQLAWAKSCILCKMITSYINQEATTWNSFLMEFKNYRDMSIKKSNETKEIIVLN  
NLCQFLHQLTKETYQDLGKDIHHQLHNWVEEWLEENNTTCQEAAVLLVQTINLSSGHMTHDEILSKYTNKVCHMLNEFQNDQIC  
NSSKARDIELHMQALVKLVFSNTSSNNINQGIEDTYFKVVKTFYY

>SITPS5

IAPPDSLYTTALKFRLLRQHGFHISQDILNDFKDENGNLKQSICKDTKDILNSSKDEHDNLKQSTCNNTKGLLKYEASFLSIENESFLR  
NTTKSTLAHLMRYVDQNRGGEEDNMIVELVVHALELPRHWMVPRLETRWYISYERMSNANPLLELAKLDFNIVQATHQQDLRIL  
SRWWKNTGLAEKLPFSRDILVENMFWAVGALFEPQHSYFRRLITKVIVFISIIDDIYDVYGTLDLELEFTLAIQRWDTKAMEQLPDYMK  
VCYLALINIINEVAYEVLKNHDINVLPYLTKSWADLCKSYLQEAQWYHNGYKPNLEEYMDNARISIGVPMVLVHSLFLVTNQITKEA  
LDLSTNYPDIIRWSATIFRLNDDLGTSSDELKRGDVSKSIQCYMNEKGASEEEAIEHIEFLIQUETWEAMNTAQSKNSPLSETFIEVAKNIT  
KASHFMY

>SITPS7

IAPPDSLYTTSLKFRLLRQHGFHISQDVLKDFKDENGNLKQSICKDTKGMLELYEASFLSTETENTLKSATRFTMSHLKNYVDNHSCG  
NQDDDIIVELVVHALELPRHWMMPKLETEWYIRIYGRMPNANPLLELAKLDFNIVQAAHQDLKILSRWWKSMSLAEKLSFSRDR  
LVEDFFWSVGLAFEPQHSLCRRMLAKNVAFIIVIDDIYDVYGSLELEIFTHAVERWDIKAMEQLPDYMKICYLSLNTNEMAYHILK  
QQGINVLPYLTKQWTDLCKSYLQEAQWYHNGHKPRLEEYMDNAWISATPLVLLHAFIFLTNPITQEALSLNNYPDIIRRCIINRFV  
DDLGTSSDELKRGDVPKSIQCYMNDTGASEEEAREHINLLIKEMWEVMNKDQISKQVLFSEEFIKIVFNFSRTSHCVY

>SITPS8

---

---

KRDHLYAKALEFRLLRQHGFNIVSQETFGGFYDNTTGFGEIHHNEDTKGMLYLYEASFLAIEGEKELELARNLTEEHLREYLADQNK  
NDVDQNLVELVHHALELPLHWRMLRLETKWFINYKQRQDKMIPFLELATLDFNIVQAAHIEDLKYVARWWKETCLAENLPFAR  
DRLVENFFWTIGVNFLPQYGYFRRIATKVNALVTTIDDVYDVFGLDELQIFTHAIERWSIDELDRLPDNMCMCYALDNFINQLAD  
DAFEEQGIFISPYLRNSWRDLCKSYLREAKWYHSQYIPSMEEYMDNAWISISAPVILVHAYFLVANPVNKEALHYLENNYHDIIRCSAL  
ILRLANDLGTSSDELKRGDVPKSIQCYMNETQASEEEARQYIRLLISQTWKKLNEAHWLAADPFPPKIFVTCAMNLRMAQCMY  
>SITPS9  
KQNDNDNNLYVVSLRFRLVRQQGHYMSSDVFKQFTNQDGKFKETLTNDVQGLLSLYEASHLRVRNEEILEEALTFTTTHLESIVSNLS  
NNNNSLKVEVGEALTQPIRMTLPRMGARKYISYENDAHHHLLLKFAKLDFNMLQKFHQRELSLDRTRWWKDLDFANKYPYARDR  
LVECYFWILGVYFEPKYSRARKMMTKVLNLTSIIDDTFDAYATFDELVTFNDAIQRWDANAIDSIQPYMRPAYQALLDIYSEMEQVLS  
KEGKLDVYYAKNEMKKLVRAYFKETQWLNDCDHIPKYEEQVENAIVSAGYMMISTTCLVGIEEFISHETFEWLMNESVIVRASALIA  
RAMNDIVGHEDEQERGHVASLIECYMKDYGASKQETYIKFLKEVTNAWKDINKQFFRPTEVPMFVLERVLNLTRVADTLY

---

*Selaginella*  
*moellendorffii*

>Sm76432  
ELVDAVRTMFRSLGDGNISRSAYDTAWVARVPALDGSNSPQFPMCLDWIKNQFEDGSWGDKDLFFTYERVCSLACVISLKIWNTQ  
EKHIEKAGLEFIRRTMPALETEESAHLMLIGFEIVFPAMLDEAMELGLDLDYSSPVVHKFHAEREKKLQRISLDVLQTHPTPLLYSVEGL  
HKSLDWHKVVKLQCSDSLSSPSTACALMYTGNEKCLQYLNNILERYKDAAVPNTYPVDLFEHIWIVDRIERLGIARYFTREIKDA  
LDYVYRNWTDKGISWARGTPIQDGGDTSMGFMVLRSHGYDVSADVFKHFQHENEHGFFCFVGQVSEAVTGMLDLYKATKVMFPG  
DVILQKARAFTRSFLDEKRRKSELNDKWVVTKDLPGVEFELDNPFHATVERIATRSYIDQYGVDDVWIGKSLYRMPFVNNPVFLEL  
AKLDFNTCQAFHKQEFKQLERWYAESSFRKFGCYHRDLEQSFFGAAAIIFEPELATAVVWSKCSFIASVIAEYFRRESSIVDLQDLLNG  
VQR  
>Sm86551  
IPATDGGRMWELVETVRSMLNSLHDGEISVSAYDTAWVARVPALDGSNKPQFPMCLNWIMNNQLEDGSWGDRLFLTYDRICSAL  
ACAIALKTWNTGDKIVHKALEFIRKTMFKMELEDSTHMPIGFEIVFPAMIEEAMALELDIDYREPVLQTIYAERKKKLERIPMNVVQN  
YPTLLHSLEGLHKTIDWDKVIKLQSPDGSLLFSPASTACALMHTGNEKCLQYLNNLVKRFNCAVNPVYPVDLFEHLWIVDRLQRLG  
ISRYFTQEIKSALDYVRYWTDKGIAWARGSPVQDADDTSMARLLRSHGYDISPDAFKTFQEGDSFVCFSGQAGQAVTGMYNLYRA  
SQVMFPGETILEEAGSFARKFLEGKRQENQLYDKWISKDLPGVEFALDNPMHARLERLATRRYIDQYAADDVWIGKSLYRMPFVN  
NPIFLELAKADFNMCRALHRKEFQQLERWYDESSLMFKGFSSRSKLEQTFYSAATIFEPELSPARLIWSQCWFISLGINEYFDHQGSTK

---

---

ELEDLINNVERWNVNSLGNCSAEVKILFVELYNIVQNHSKQGFLYQGRSIGGALREIWKTWLSLLQRTKWKMSDNNPTLEEYLKAS  
HSSIEPAVRSTMYFVGETLATTGDIKDSAICQMMNTASRLVQDTHTDKVDSSLNSITIYLEENPQLTKSEALSEVQALANKNMQKLLY  
ETLQPGALPQACKQLFLNAARIMNVFPGTNKVQAKLSNHVKRVLSQPVL

>Sm112927

MIEEMRKL LASLDDGEISPSAYDTAWVGRIPSQSNSTCPEFPETLEWIAHNQLPDGSWGDRNHFQIYDRVLSTVSLVALKTWNLGH  
DNINKGSERFLKQNIYKLTCKDKGDL LCGFELIFMTMLEEAKQKGLDIPIDIPALKILOQYRQKKLQKIPLMVHSIPTTILYSLEGLQDHI  
NWEKILQFIGTDGSFLSSPSATACVYMHTKDARCLEYLKGVVKKVKNVPCQY AIDLFERLWIVDTLERLGIDRYFQPEIKNILDYVYK  
YWSDKKGIGWGRDSYLDKIDDDTSMGFRLRLRHGYKVTPDVF LNFMSSEDKFFCFPGESYHGASDIFNLYRASQVAFANDNILTKAKN  
YAHKYLSQLDKAYLDKWSAKKNFFQEVEFELSNQWNSCLPRAYSKEYIHNYPNDIWIAKTIYRPLPFVNNELFINLAKEDFNACQSIH  
QSEIQTLLRWWAALKFGDLPFFGDKVVT AHFSIASCMFEPEFSELRLFYTKYALLSSTLDDLADYYGSPAQTRCILEAIRSWDPSLVSHL  
SEEVQICFSGLYRTINEMVKSASKVQTGSSIDIREHMQEQLISAQLVDAEWMERKHIPSFETYLSNATVSVGMQDLLLSSIFFCGESISKH  
LMQEIKNSRCLQLTCLiarLCNDIGTYQFEREKGEVASSITCYMRENPGITESQAIEHLQGIIDESWKELTEEFLTPSQIPRSIKRLMFETA  
RIFQFIYPKKDNFKDPSKAMASLIQNVLYKAAE

>Sm124329

MQAYDTRESPCKKLPDLINERQMLRLVSDGNISMSPYDTAWVARVPSPLNSQQPEFPQCLDWIVENQRQDGSWGDEVFNIYDRIL  
CTLSCILALKTWNIIHDDVIATGKSNILASTEDKGDLLVGFELIFPPMVEEAKSQGLRIPSNHLFIQLLEELREAKLKGISLDTIHSAPTTVL  
FSLEGLQECIDWTQILTLQSEDGSFLTSPSSTACVYLHTKDEKCLTYLRNLVKLHKNVAVPDFYPLDMFERLWVVDTLQRLGIDRFFKQE  
IKEILDYVYRYWDDKKGIGWARNVSVPELDCSGMGFRLRLNGYDVSADVFTNFMKDGKFFCFSGERSHGISDVFSLFRASQVAYPKE  
AILDQAHAYSQQYLSHLHDHGLDKWAFKNDLSGEVTFELNNAFCSCPPRLYAKSYISKYGTDDSWIAKTIYRPLPNVNNAAFLEMAK  
QDYDFCRSVLQDETAELSRWWSSTGISFTSKRVKLT DHLVNRLHFQIAAYIFEPELSAMRLAYTKAACLVVACDDLADHFLDAREYQ  
ELVASIERWDDPSATKLTDDAKSFYHAVYTTLNELMQEASKACVSTSGIISRQFAVYAKSVVGEVTQRGNTSMPTLEEYLKKSRRPTGI  
PAVIICSLPFCGIDMDLETLERASNCKEMELTCDIIRLSNDLATYKVEMENGLSISSITAYLNYCPETSKEDAVKKVTEILDQKTKELIQV  
YTQQSKDGLPQLVRRIFETARTARLVYANGIKESRDELKLPGDMMQTVIRNIIGTKGDVEPSHIN

>Sm163980

MLNSLHDGEISVSAYDTAWVARVPALDGSNTPQFPMCLNWIMNNQLEDGSWGDRDLFLTYDRICSAACAIALKTWNTGDKIVHK  
ALEFIRKTM PKMELEDSTHMPIGFEIVFPAMIEEAMALELDIDYTAPVLQTIYAERKKKLERIPMNVVQNYPTLLHSLEGLHKTIDWD

---



---

KVIKLQSPDGSLFSPASTACALMHTGNEKCLQYLNVLKRFNCAVNPVYPVDLFEHLWIVDRLQRLGISRYFTQEIKSALDYVYRYW  
TDKGIAWARGSPVQDADDTSMARLLRSHGYDISPDAFKTFQEGDSFVCFSGQAGQAVTGMYNLYRASQVMFPGETILEEAGSFARK  
FLEGKRQENQLYDKWIISKDLPGEVEFALDNPMHARLERLATRRYIDQYAADDVWIGKSLYRMPFVNNPIFLELAKADFNMCRALH  
RKEFQQLERWYDESSLMSFKGFSRSKLEQTFYSAAATIFEPELSPARLIWSQCWFLSLGINEYFDYQGSTKELEDLINNVERWNVNSLG  
NCSAKVKILFVELYNIVQNHSKQGFLYQGRSIGGALREIWKTWLSLLQRTKWKMSDNYPTLEEYKASHSSIEPAVRSTVYFVGETLA  
TGDLKDSAICQMMNTASRLVQDTHTDKVDSSLNSITIYLEENPQLTESEALSQVQALANKNMQKLLYETLQPGALPQACKQLFLNA  
ARIMNVFPGTNKVQAKLSNHVKRVLSQPVL

>Sm402349

MLMELMQFSSIDDDDFVQSTMSSDGNRLQHCRSVIVELLLLARRERRAGGRKVGPGVRSQAQQAGGLVVSASGIFCIIVSSKPQSDFLS  
GVFDFSNPPTGRSLPHSHELLPPLGTLEAVVVGCLLVGAGDLVEKGKLSLDCDCDCGCGGKFAISGDDDKLLLALLYWCGSMLNL  
SISLCRTRTSYNVETTLTLREGIQGENRSLQRAADDGRSDCLVISRFEQSACIIHLASGERSPARSAFLFSQRECENRSPRTRQNFLACRT  
GQNESTGEHETTELKRGCKTRPGDVGVIYFYEIFRNAEELAAENGRMGVGDGSGVIVSFLWQPLLQQRSLVRSFANFDDDF  
SLGVADTLFVNRSRVETGYSWSLFLASYRSFSHGSKRNKTPPNTQPASTLDAAKMLQHGGDAFEIATDSQTSVVVTSCTGSFLLKG  
QNQGRREGKAFAMAKVLFSSFQQTGISGLKSGQLSGVFINGTNLKSNAHAKRFRKNSTSSITISCCASNSPTLENTKLAEAEPEKRQKK  
KQLPYQGILHVPGDRVEELDTRETSLLVAEVKGWLMKLAGSKGEISPSAYDTAWVARIPSESDSSLPEFPEALEWIINSQLPDGSGWGD  
RHLQLYDRVLSTLSCLVTLKTWDIGHNSIAQGTKFLRENMIKLLKQDDGDLLSGFEVTFPMMLHEAKQLGLDIPYETEFTRLLEISTKKK  
LAKIPLDKIHSAPTLLYSLEGLQDLEIDWQKILKLQSKDGSFLSSPSSTACVYLKTKDRKSLQYLQNAMEQNYAVPCHYPIDLFESL  
WVVDTIERLGIDVFFRDEIKAVLDYVYSFWTNEGIGWGSTCLVNDIDDTAMAFRILRMHGYNVSPDAFNQFWLPGDKFCCFVGELSH  
GVSEMLNLHRASQVDFPNEAILTKTFKYSHDYLLNVDSAHMDKWATKKNLMGEVAFELANPFHDCLPRIYNNAYIKHYGMDDLW  
IAKTIYRQLANRYAQQCQSYQPSELTELVNWWHSSRFEDVPSTRLTANIDMLPYIYYVICATFHEQEFAQLRVFFSKACCLNTLFDDL  
MDCATSIEELDRLQNVIERWDISLSHELPLEYRIPFQEFYNTVLVMTEAASKIHKNLSPEFICKYLSGIYTKLIKSEIADARWKIEGYIPSE  
EYMENAEVSISTWVHIEMKLGQPTQGVSCYMKEHPGATEEDALVYLQSLLEKTKRELNESYFITHENDLPKNIKRFNFEMVRMMLIT  
YNETRQLSKTD

>Sm402351

MPGRKHDDHGLLDEWKLVRGCRSRALPSHGSQGGGLNADDTAYECSHSRLVLTATSKAVVSERQSISSRALQRLTRTSIILLAWRRI  
KRLGYWQANEHQVFAQWCTKVDSIADIEGRFLVTQMKYARASKSIALDVEEEKMKVTITRRFQHTGISGIFKSGQLFGSNLKTNAQI

---

---

RKGS LTPSIRITCCASNPLNFGNTKPAEAEPEKRQRKQQPYQGILHVPDDRIEELDYRETSLLVEEVKGWQMKLASGKGEISPSAYDTA  
WVARIASECSSLPFPEALEWIINSQLPDGSGWDDRHLQLYDRVLSTLSCLVTLKTWDIGHNSIAQGTKFLRENMIK LKQDDGDLLS  
GFEVTFPMMLHEAKKLGLDLPHETDCLGIPLDKLHSAPTTLLYSLEGLQDLEIDWQEILKLQSKDGSFLSSPSSTACVYLKTKDRKSLQ  
YAMQVQNYAVPCHYPIDLFESLWVVDTIERLGIDVFFRDEIKAVLDYVVSFWTNEGIGWGSTCLVNDIDDTAMAFRILRMHGYNVSP  
DAFDQFWLPRDKFCCFVGELSHGVSEMLNLHRASQVDFPNETILTKTFKYSHDYLLNVETAHMDKWGNEEKPHGRSNEIQVIFELA  
NPFHDCLPRIYNNAYIKHYGIDDPWIGKIIYRLPLVNNKVLLELANWYSQQCQSYQSSELIELTKWDISLSQKLPLKYKIHVQELYNTIL  
VMTETASKIHQILSSKFIHNYLSKIYTDLIKSRISAHCRIQGYIPSFKEYMQNAEVSISIGSPVMSILFCGEPLTEELLNTIHDSKPLKLNII  
FRLCNDNIKGETEEDALS YLSLLEKNKK

>Sm403761

MSSFSLAQHRRLLLLLLLPRRSARGVSSSCARLADDDEKKVSSRLFQRQQVMNAREEDALEEATGPPPKVTTDHVTMSFARSSGAGGQ  
NVNKGHGCSVAAPQSQQAASNGRASRIIGRNIEDALEKIQEIIIDEACYVPPPPSEETKNRVIKLTCKLHLKTVVLSAISPFRGYTQ  
QRVPPDPHLGVSPDGALHEGGHCDFLSVYPTKLFHLKIEMQEIIIEALQRCKAIAVVLFAEDLELLTVKLRMSFSAIQSSGFFTQDNK  
IKYFHSGRRSKALNVGSFTQFSAGLVLRAGLEVHGTLSIQSHPSKCECEDGSDWQGEEDVQRV CSTLSCVTALKTWNRGECSIQRGVS  
FLMSRLPLVHNKLTKDMKAILHRLQEGKSLDLELNYDES FVQHICEQGQEF LQRVSNDALEQYPTSFVHMLEAFHDRPKWQRLLR  
YQSSGSLFSVTLTACAYMHTGDRKCLRFLNGLLEGPLTKPNKNLSQLLRLIDWLEHLGIERFFEKDIEQTLIQAFRFRWGNAAGSGRQ  
QHLKSFEDSALLFRILRRHGYEVS PDVLHQRTFCETRDLKELSLASHFLFPSES RKMLDSIPIIDVANQETTFPWYSIPHRVQHIEYMTKF  
MASMDSISM SERASLLAFTKFDNACQKIYQSDLQRV MRWNGECDFGRLGFARQKEVFCFFTA AATMFQPELSMARIVWAQMSVLT  
TVIDDFMDTHDSL DNLRNFCTAVKRWDPSALELNEAARIIFQGLFKTVTWTAE CASAVQGRDMTANLRAQWERL CDAFFREAEWR  
LTNHCP SLEEYME NGITSFALEPIILSAILFLDGKVESSVLDHPDCINMYVRVSTIGRLLNDIQGFHRESSGGEFSWIAIYMKEHPGTSVE  
DAVVEIRKILNATMEELVEDVLRPRAVPKRCKRVFENTMRILNFVYHKGDGFSTDELRGHV KQDTIWYFSVKAGGCDGATGVKTL LP  
TFPCGKG

>Sm403764

MSFATQISSGLFAPNNIPSSKRFKPLNMG SFTQFSAGLVLRAGVKVPGT LSVQSHPSKES SSTIKL FAGVDDACGFSAYDMGWIARI  
PHAHNPELGPQFPQSLEWIVHNQCDDGSDWQGEEDAQRV CSTLSCVIALKTWNRR ECSIQRGLSFLKSQRPLVHDKL TRDMEAILH  
RLLQEGKSLDLELNYDES FVQRICEQGQEF LQSVSNDA LDQYPTSFVHILEAFHERANWQHLLRYQSSGSLFSVTLTACAYMHTGD  
KKCLRFLNGVLEGPLTKPNKNRHF RGLS QLLRLAEWLEHLGIERFFEKEIEQTLIQAFRYNVFYPSDRLSKAIHVIDVTTFPWYNIMHRI

---

---

QHIEYMTKFTASMDFISTERSILAFKSDFNACQKIYQKDLQHVMRWNEECGFGRLGYARQKDVFCVFTAATMFQPELSMARIV  
WAQMSVLTTVIDDFMDTHDSLNLNRFCTAIRRWDPASSELNDDASILFRGLLKTVTWTAQCASAVQGRDMTASFRAQWERLCA  
FFREAEWRLTNHCPSLEEYVENGITSFALEPIVLSTLLFLDEKIESAVLDHPDCINMCRRVFTIGRLLNDIQGFDRESSAGEFSWITIYMKE  
HPGTSVEDAVVEIRKILNATIEELVEDVLRPRAVPKRCKRVFENMMRILNFVYRKGDGYSTDAELRGHIKQAPRMACHSVRLKEILAN  
GAENEGDGRANNSVITEMWSIP AISYKISEDILCFRKS LITGAVWQFILQRDLELQINHQQSN

>Sm406214

MSSFSLAQHRRLLLLLLRPRSARGVSSCARLADDDEKKVSSRLFQRQQVMNAREEDALEEATGPPPVTMDHVTMSFARSSGAGGQ  
NVNKGHGCSVAAPQSQAQAASNGRVSRIIGRGNIEDALEKIQEIIIDEACYVPPPPSEETKNRVIKLAAAEDQKRLQIKKQIANKKSSR  
REQRASFTKNLWYSQQSVPSVDTFNNGVKALSSTRSYQCLAYSKGKFRVRCANMDSGQCRQIPHLGVS PDGALHEGGHCDFSLSVY  
PTKLFHLKIEMQEIIIEAFLCFIKAIAVVLFGTAEGLELLTVKLRMSFSAIQISSGFFTQDNKIKYFHSRRSKALNVGSFTQFSAGLVRA  
GREVHGTL SIQSHLSSKESTIKKLFAGVNDASGFSAYDMGWIARIPHAHNPELGPQFPRSLEWIVHNQCEDGSWDQGEEDVQRVCST  
LSCVTALKTWNRGESVQRGVSFLMSRLPLVHNKLTDMKAILHRLQEGKALDLELNYDES FVQYIREQQEFLQRVSNDALDQY  
PTSFVHMLEAFHDRPKWQHLLRYQSSGSLFSVTLTACAYMHTGDRKCLRFLNGLLEGPLTKPNKNLSQLLRLVDWLEHLGIERFFE  
KDIEQTLIQAFRFRWRGNAAGSGSQQHLKSFEDSALLFRILRRHGVEVSPDVLHQRTFCETRDLKELSLASHFLPSES RKM LDSTPIIDV  
ANQETTFPWYSIPHRVQHIEYMTKFM TSMDSISMERASLLAFTKDFDNACQKIYRSDLQRVMRWNEECDFGRLGFARQKEVLCFFT  
AAATMFQPELSMARIVWAQMSVLATVIDDFMDTHDSLNLNRFCTAVKRWDPSALELNEAARIIFQGLFKTVTWTAECASAVQGR  
DMTANLRAQWERLCAFFREAEWRLTNHCPSLEEY M ENGITSFALEPIILSAILFLDEKVESSVLDHPDCINMYVRVSTIGRLLNDIQG  
FHRESSGGEF SWIAIYMKEHPGTSVEDAVVEIRKILNATMEELVEDVLRPRAVPKRCKRVFENMMRILNFVYHKGDGFSTDELRGHV  
KQVLHVKLE

>Sm407280

MSKVLLSSFQRTGGGSLQLFGGTNLKSNAQPNRFRKVSCCASKPAEVLEKREKEKQQPYQGILHVQAGDRIEELDHRETSLLVKEVK  
GWLMLKASGKWEISPSTYDTAWVARIPSDSDSSLEFPEALEWIINSQLPDGSGWTKFLRENMIKLNHADGDFLSGFEVTFPMMMLHE  
AKRVGLKLPYDTEFTRLLEISTTEKLAKISLDRLHSTPTLLYSLEGLQGLEIDWQKILKLQSKDGSFFSSPSSTACVYLKTKDKKSLQYLQ  
KAMKNQNYAVSCHYPIDLFESLRVVD TIERLGIDLFFRDEIKAVLDYLYSFWTNEGIGWESTCIVNDIEDTAMAFRILRMHGYSVSPDA  
FNQFWLPGDKFCCFVGELPHGVSAMLHLYRASQVDFPNEEILTKTKFYSHDYLLNVESSHTSATKKNLMGEVTFELENPLHDCLPRIY  
NNAYIKHYSIDDPWIAKTIYRLPHVNNKVLELANRYAQQCQSYQRSELKILVEWWHSSH FEDIPSTRFKSNVNMLPYIYYVICSTFHE

---

---

QNFQQLRIFFTKCCMNTLFDLLDSAKSITEHLQNMIERWDTSFLSQKEYKIIFQEFYNTILVMTEMASKINQNLSPFIHKYLLAI  
GTELIKSGIIDARWKLQGYIPGFEEYMENAEVSI GIATHLLMGILFCGDHLTEELLNIIYDSKLLKLSIISRICNDIQTYKIEMKLGQSAH  
GVSCYMKDHPGETEEDALAYLQSLLEKTKKQLNEIYFTEKDLPKNIKRFNFDIARMMMFTYNKAKQDLFRNPNKELQNMIEFCLKA  
>Sm412139

MSKVLLISFQRIGSGSLQLFGGTNLKSNAQPNRFRKVSSCASKPAEAELEVKGWLMKLASGKGKISPSTYDTAWVARIPSDSDSSLPEFPE  
ALEWIINSQLPDGSWDDCTKFLRENMIKLNHDDGDFLSGFVTFPMMLHEAKRVGLKLPYDTEFTRLLEISTTEKLAKIPLDRLHSTP  
TTLLYSLEGLQGLEIDWQKILKLQSKDGSFLSSPSSTACVYLKTKDKKSLQYLQKAMKHQNYAVSCHYPIDLFESLRVVDTIERLGIDLF  
FRDEIKAVLDNLYSFWTNEGIGWGSTCIVNDIEDTAMAFRILRMHGYSVSPDAFNQFWLPGDKFCCFVGELSHEVSAMLNLYRASQV  
DFPNEETLTKTFKYSHDYLLNVESSHTSATKKNLMGEVTVELANPFHDCLPRIYNNAYIKHYSIDDPWVAKTIYRLPLVNKKVLELA  
NRYAQQCQSYQPSELKILVKWWHSSH FEDIPSTRFKANINMLPYIYVICA TFHEQEFGPLRFFFTKCCMNTLFDLLDSAKSIRELDS  
LQNMIESWDTSFLSQKEYKIIFQEFYNTILVMTKIASKINENLSLEFIHKYLLAIYTKLIKSGIIEARWKIQGYIPGFEEYMENAKVSIAT  
HVLMGILFCGDPLTEELLNIIYDSKLLKLSIISRICNDIQTYKIEMKLGESAQGVSCYMKDHPGATEEDAVAYLQSLLEKTKKQLNEIY  
FTEKDLPKNIKRFSDMMMFTYNKAKQDLFKNPNKELQSMIEFCLET  
>Sm418910

MPNYYNKDSSLIVTLAKLVDKKSLRQAGRQDSAMASVLFKHTGTSASLKSSRAPATRISCCSLSFDNKKPAEAPENQKKKQQPYQ  
GILHVPADHVEELDHRETSLVAEVKGWLMKLASGKGEISPSAYDTAWVARIGSESDSSLPEFPEALEWISSQLSDGSWGYDRHLQLY  
DRVLSTLSCLVTLKLWDIGHSCITQGTKFLRENMIKQDDGDLSSGFVTFPMMLKEAKQLGLDLPYDTEFTRLLEISTKKKLAKIPL  
DRLHSSPTLLYSLEGLQGLEMDWQKILKLQSRDGSFLSSPSSTACVYLKTKDRKSLQYLQKAMEDQNYAVPCHYPIDLFESLWVVD  
IERLGIDVFFRDEIKAVLNYYSSWTNEGIGWGSTCLVKDIDDTAMAFRILRMHGYNVSSDAFNQFWLPGDKFCCFIGEVSHGVSEML  
NLHRASQIDFPNEEILTKTFKYSDGYLLNVESSHMDKWAMKKNLMGEVAFELANPFHDCLPRIYNNAYIKHYGVDDPWIGKTIYRLP  
LVNKNVLELANRYAQQCQSYQPSEMIELVNWWHSSGFENIPSTRKANINMIPYLYYLICSTFHEEEFGQLRVFFIKTCCINTLFDLL  
DYATNIKELDHLENVIERWDISMSQELSLEYKILFQEFYTIIVLVMTEAASKIHQNLSPFIYKYL LGICIKVIKSIADARWKIQGYIPSFEE  
YMENAEVSVSSWVHILMGIFFCGELLTEELLNIIYDSKPLKLDRIISRLSNDMKT YKIEMKLGQAQGVSCYMKDHPGATEADALIYL  
QSLLNKTKKELNESYFISHQKDLPKNIKRFNF EIVRMILIT YNEVRQVDL FKNPDKELQDMIEFSLETYRISNQ  
>Sm439448

MSMSTFFKGPLLLTMFAYNYRPEIRQRIDHPIYGNRHVEAKVLLSSFQHIGGGSLQLFGGTNLKSNAQPNRFRKVSSCASKPAEAELEK

---

---

REKEKQQPYQGILHVQAGDRIEELDHRETSLLVKEVKGWLMKCLASGKWEISPSTYDTAWVARIPSDSDSSLPEFPEALEWIINSQPLPDG  
SWGTKFLRENMIKLNHADGDFLSGFVTFPMMLHEAKRVGLKLPYDTEFTRLLEISTTEKLAKIPLDRFHSTPTLLYSLEGLQGLEID  
WQKILKLOSKDGSFFSSPSSTACVYLKTKDKKSLQYLQNAMKHQNYAVSCHYPIDLFESLRVVDTIERLGIDLFFRDEIKAVLDYLYSF  
WTNEGIGWESTCIVNDIEDTAMAFRILRMHGYSVSPDAFNQFWLPVDKFCFVVGELSHGVSAMLNLYRASQVDFPNEEILTKTFKYS  
HDYLLNVENSHTSATKKNLMGEVTFELANPFHDCLPRIYNNAYIKHYSIDDPWIAKTIYQLPLVNKKVLELANRYAQQCQSYQPSE  
LKILVKWWHSSH FEDIPSTRFKANINMLPYIYYVICATFHEQEFGPLRIFFTKCCMNTLFDDILDSAKSITE LDSLQNMIESWDTSFLSQ  
KEYKIIFQEFYNTILVMTKMASKINQNLSPFIHKYLLAIYTKLIKFGIIEARWKIQGYIPGFEEYMEHAEVSIATHVLMGILFCGDPLT  
EELLNIIYDSKLLKLSIISRICNDIQTYKIEMKLGESAQGVSCYMKDHPGATEEDALAYLQSLLEKTKKQLNKIYFTEKDLPKNIKRFSG  
DMARGMMFTYNKAKQDLFKNPNKELQSMIELCLET

---

TPS proteins from *P. equestris* and *A. shenzhenica* were obtained from their genome database [25]. The other TPS proteins were downloaded from Phytozome version 12.1 database (<http://phytozome.jgi.doe.gov/pz/portal.html>).

Table S7 The FPKM values of *DoTPS* genes in different *D. officinale* organs.

| Gene ID        | Fb       | Se        | La        | Po       | Gs       | St       | Le      | Ro      | Rs      | Rw      |
|----------------|----------|-----------|-----------|----------|----------|----------|---------|---------|---------|---------|
| <i>DoTPS1</i>  | 1.2173   | 12.3391   | 1.7087    | 0.0947   | 0.1462   | 0.0000   | 0.0506  | 0.0000  | 0.0000  | 0.0000  |
| <i>DoTPS2</i>  | 0.6080   | 5.9884    | 3.2341    | 0.0000   | 1.5680   | 0.9939   | 0.0319  | 0.3406  | 0.1358  | 0.0000  |
| <i>DoTPS3</i>  | 8.3954   | 34.6934   | 17.0447   | 0.0000   | 7.0096   | 8.1833   | 0.0000  | 2.3638  | 0.3534  | 0.1604  |
| <i>DoTPS4</i>  | 1.8939   | 1.3733    | 1.1464    | 0.0000   | 4.1851   | 3.5203   | 0.3542  | 7.8949  | 23.4339 | 16.4147 |
| <i>DoTPS5</i>  | 0.7914   | 13.2949   | 152.6900  | 0.0448   | 2.5230   | 0.0000   | 0.1076  | 9.6566  | 0.8778  | 15.8660 |
| <i>DoTPS6</i>  | 0.0400   | 0.0000    | 0.0421    | 0.0000   | 0.0000   | 0.0000   | 0.0000  | 0.7572  | 3.9059  | 0.0000  |
| <i>DoTPS7</i>  | 0.4317   | 14.0691   | 49.8742   | 0.0895   | 1.2788   | 0.2708   | 9.2217  | 3.6585  | 0.9160  | 0.6236  |
| <i>DoTPS8</i>  | 9.4823   | 6.6341    | 11.0165   | 0.5050   | 23.4320  | 5.9896   | 0.5539  | 1.3638  | 1.1329  | 0.6170  |
| <i>DoTPS9</i>  | 4.0618   | 0.2621    | 0.0211    | 0.0374   | 4.0561   | 1.2428   | 0.0000  | 7.9739  | 4.5215  | 7.8422  |
| <i>DoTPS10</i> | 0.0000   | 1028.7356 | 3268.7298 | 0.0632   | 145.0056 | 0.0956   | 0.0676  | 0.0000  | 0.0000  | 0.0000  |
| <i>DoTPS11</i> | 0.0000   | 0.0000    | 0.0000    | 0.0000   | 0.0000   | 0.0823   | 0.0000  | 0.0000  | 0.0000  | 0.0000  |
| <i>DoTPS12</i> | 0.0000   | 0.0000    | 0.1695    | 0.0000   | 0.0000   | 0.0000   | 0.0000  | 0.1904  | 2.0500  | 0.0000  |
| <i>DoTPS13</i> | 0.0000   | 0.1373    | 0.0000    | 0.0228   | 0.0000   | 5.2483   | 0.1830  | 7.2889  | 3.1529  | 0.7420  |
| <i>DoTPS14</i> | 3.3417   | 2.8140    | 2.2112    | 3.4162   | 2.7519   | 1.5051   | 0.6905  | 4.7703  | 3.8745  | 2.8503  |
| <i>DoTPS15</i> | 0.0000   | 0.0000    | 0.0772    | 0.0000   | 0.0000   | 0.0000   | 0.0000  | 6.8117  | 24.9504 | 0.6713  |
| <i>DoTPS16</i> | 0.2951   | 0.0000    | 4.8930    | 118.7210 | 2.5872   | 0.0694   | 0.0000  | 0.0000  | 0.0783  | 0.0710  |
| <i>DoTPS17</i> | 0.0000   | 0.1034    | 0.0000    | 0.0000   | 0.4953   | 759.8893 | 22.0740 | 0.0000  | 0.0781  | 0.5673  |
| <i>DoTPS18</i> | 0.0727   | 0.0680    | 1.3780    | 0.3394   | 0.5240   | 0.0000   | 0.2176  | 14.4042 | 1.3501  | 0.2451  |
| <i>DoTPS19</i> | 0.0842   | 4.0566    | 14.2685   | 0.0000   | 9.7867   | 78.5955  | 0.6298  | 0.3982  | 0.0447  | 0.0000  |
| <i>DoTPS20</i> | 2.0532   | 6.7076    | 29.2717   | 0.3681   | 14.9119  | 6.1246   | 18.3284 | 2.9219  | 0.5169  | 0.8713  |
| <i>DoTPS21</i> | 0.0390   | 100.6108  | 2716.5036 | 0.0243   | 81.5684  | 0.0000   | 0.0000  | 0.0000  | 0.0000  | 0.0376  |
| <i>DoTPS22</i> | 0.0719   | 15.6847   | 616.6676  | 0.0000   | 5.2533   | 0.0000   | 0.0000  | 16.0802 | 10.3427 | 68.1060 |
| <i>DoTPS23</i> | 0.1091   | 16.3636   | 61.3193   | 1.1765   | 38.9150  | 0.1711   | 0.4715  | 7.7396  | 1.5816  | 0.3501  |
| <i>DoTPS24</i> | 0.3074   | 219.5391  | 153.9008  | 0.0273   | 18.3111  | 0.2480   | 0.0438  | 4.6220  | 0.6057  | 0.4229  |
| <i>DoTPS25</i> | 19.2802  | 4.3919    | 0.0817    | 0.0000   | 3.5780   | 6.8637   | 0.0387  | 93.8604 | 23.4594 | 19.3139 |
| <i>DoTPS26</i> | 0.0369   | 0.0000    | 1.2815    | 1.9052   | 0.6734   | 0.0000   | 0.0000  | 0.0436  | 0.0000  | 0.0000  |
| <i>DoTPS27</i> | 0.0000   | 7.6697    | 3.0748    | 0.0000   | 0.3319   | 0.0000   | 0.0313  | 0.0000  | 0.0333  | 0.0000  |
| <i>DoTPS28</i> | 260.6178 | 29.7739   | 0.9286    | 0.0203   | 27.5280  | 3.6897   | 0.3585  | 12.3247 | 7.6256  | 8.0543  |
| <i>DoTPS29</i> | 0.8101   | 0.0345    | 0.0388    | 0.0458   | 0.0000   | 0.2426   | 0.0000  | 0.0000  | 0.9766  | 0.0355  |

|                |         |         |         |         |         |         |         |         |         |         |
|----------------|---------|---------|---------|---------|---------|---------|---------|---------|---------|---------|
| <i>DoTPS30</i> | 0.2087  | 0.1562  | 0.3955  | 0.0000  | 0.1203  | 0.3536  | 0.0000  | 18.7103 | 4.4290  | 9.8092  |
| <i>DoTPS31</i> | 28.8962 | 19.5584 | 38.1274 | 68.4811 | 38.0720 | 29.1411 | 16.1677 | 23.9266 | 19.2718 | 24.4360 |
| <i>DoTPS32</i> | 13.7093 | 6.9285  | 5.0302  | 9.2781  | 10.4072 | 32.5144 | 24.9788 | 41.6248 | 37.2907 | 25.5609 |
| <i>DoTPS33</i> | 1.7942  | 6.8443  | 0.8718  | 0.0286  | 0.8840  | 2.6845  | 0.2753  | 0.0000  | 0.0000  | 0.2215  |
| <i>DoTPS34</i> | 0.7452  | 0.0634  | 0.1070  | 0.0211  | 0.4230  | 0.1275  | 0.0000  | 13.9790 | 1.1140  | 33.6942 |

---

All FPKM values were downloaded from NCBI under BioProject PRJNA262478 <sup>[25]</sup>. The different tissues were sepals (Se), labellum (la), green root tips (Rt), roots (Ro), white part of roots (Rw), pollinia (Po), flower buds (Fb), gynostemium (Gs), stems (St) and leaves (Le) in two-year-old *D. officinale* adult plants.

Table S8 The expression values of *DoTPS* genes in response to 200 mM mannitol treatment for 48 h.

| GeneID         | Mannitol-0h | Mannitol-12h | Mannitol-24h | Mannitol-48h |
|----------------|-------------|--------------|--------------|--------------|
| <i>DoTPS1</i>  | 0.1276      | 0.1598       | 0.0000       | 0.0000       |
| <i>DoTPS2</i>  | 0.3753      | 0.3901       | 0.5617       | 0.2568       |
| <i>DoTPS3</i>  | 0.3959      | 0.1410       | 0.0564       | 0.0580       |
| <i>DoTPS4</i>  | 0.0052      | 0.0223       | 0.0877       | 0.0476       |
| <i>DoTPS5</i>  | 1.3909      | 1.8039       | 1.7631       | 2.1192       |
| <i>DoTPS6</i>  | 0.0752      | 0.0559       | 0.0333       | 0.0238       |
| <i>DoTPS7</i>  | 0.0803      | 0.4008       | 0.4808       | 0.3799       |
| <i>DoTPS8</i>  | 1.4286      | 0.0000       | 0.1358       | 0.0000       |
| <i>DoTPS9</i>  | 0.0764      | 0.0954       | 0.0763       | 0.0784       |
| <i>DoTPS10</i> | 0.3944      | 0.6160       | 0.2956       | 0.4044       |
| <i>DoTPS11</i> | 0.1605      | 0.1372       | 0.0016       | 0.0067       |
| <i>DoTPS12</i> | 0.0000      | 0.0003       | 0.0003       | 0.0000       |
| <i>DoTPS13</i> | 1.2635      | 1.1821       | 2.8364       | 0.1297       |
| <i>DoTPS14</i> | 0.0000      | 0.4826       | 0.1544       | 0.0000       |
| <i>DoTPS15</i> | 0.0674      | 0.0873       | 0.3506       | 0.1410       |
| <i>DoTPS16</i> | 3.2468      | 0.0000       | 0.2592       | 0.0666       |
| <i>DoTPS17</i> | 1.6198      | 1.3183       | 1.8725       | 2.0104       |
| <i>DoTPS18</i> | 7.9091      | 1.2334       | 0.7234       | 0.2029       |
| <i>DoTPS19</i> | 0.0072      | 0.0000       | 0.0000       | 0.0000       |
| <i>DoTPS20</i> | 0.0000      | 0.0000       | 0.1637       | 0.0000       |
| <i>DoTPS21</i> | 1.0867      | 1.0439       | 1.0018       | 0.7717       |
| <i>DoTPS22</i> | 0.0994      | 0.0000       | 0.0000       | 0.0000       |
| <i>DoTPS23</i> | 2.0970      | 0.1539       | 0.0615       | 0.0000       |
| <i>DoTPS24</i> | 0.3125      | 0.2748       | 0.2256       | 0.0000       |
| <i>DoTPS25</i> | 2.4727      | 2.2591       | 1.7555       | 1.8702       |
| <i>DoTPS26</i> | 0.0036      | 0.0030       | 0.0000       | 0.0000       |
| <i>DoTPS27</i> | 0.1819      | 0.0567       | 0.0000       | 0.1400       |
| <i>DoTPS28</i> | 0.1157      | 0.1900       | 0.1350       | 0.1482       |
| <i>DoTPS29</i> | 0.0000      | 0.9553       | 4.0462       | 2.3205       |
| <i>DoTPS30</i> | 0.1083      | 0.1157       | 0.1886       | 0.1455       |
| <i>DoTPS31</i> | 0.3650      | 0.2843       | 0.0910       | 0.0937       |
| <i>DoTPS32</i> | 0.2708      | 0.0000       | 0.0000       | 0.0926       |
| <i>DoTPS33</i> | 0.0569      | 0.0637       | 0.0965       | 0.1391       |
| <i>DoTPS34</i> | 0.0000      | 1.9598       | 0.2137       | 2.7829       |



Table S9 The FPKM values of *DoTPS* genes exposed to cold treatment (0°C) for 20 h.

| Gene ID        | CK1     | CK2     | CK3     | CA1     | CA2     | CA3     |
|----------------|---------|---------|---------|---------|---------|---------|
| <i>DoTPS1</i>  | 0.2354  | 0.0000  | 0.0000  | 0.0000  | 0.0000  | 1.4929  |
| <i>DoTPS2</i>  | 0.0000  | 0.0000  | 0.0000  | 0.1970  | 0.0655  | 0.0000  |
| <i>DoTPS3</i>  | 0.0244  | 0.0000  | 0.0000  | 0.8976  | 0.1642  | 0.1211  |
| <i>DoTPS4</i>  | 0.5900  | 0.3483  | 0.2700  | 0.0000  | 0.0494  | 0.0000  |
| <i>DoTPS5</i>  | 0.0577  | 0.0000  | 0.0633  | 12.4024 | 0.0000  | 0.0648  |
| <i>DoTPS6</i>  | 0.0000  | 0.0000  | 0.0000  | 0.0278  | 0.0000  | 0.0000  |
| <i>DoTPS7</i>  | 2.6395  | 3.4961  | 2.5775  | 3.7131  | 1.8002  | 4.8149  |
| <i>DoTPS8</i>  | 0.2326  | 0.1741  | 0.2829  | 0.1317  | 0.1332  | 0.0485  |
| <i>DoTPS9</i>  | 0.0000  | 0.0000  | 0.0000  | 1.1013  | 0.8665  | 0.7629  |
| <i>DoTPS10</i> | 0.0572  | 0.0000  | 0.5597  | 0.0000  | 0.0000  | 5.2860  |
| <i>DoTPS11</i> | 1.6998  | 0.5873  | 0.9166  | 5.1072  | 2.2991  | 2.4442  |
| <i>DoTPS12</i> | 0.0000  | 0.0000  | 0.0000  | 0.0648  | 0.0633  | 0.0577  |
| <i>DoTPS13</i> | 0.1689  | 0.0000  | 0.0371  | 0.0402  | 0.0000  | 0.0000  |
| <i>DoTPS14</i> | 0.6177  | 0.4155  | 0.4545  | 1.6973  | 1.8028  | 1.0530  |
| <i>DoTPS15</i> | 0.0000  | 0.1376  | 0.3573  | 0.0000  | 0.2571  | 0.2266  |
| <i>DoTPS16</i> | 0.1834  | 0.0000  | 0.0965  | 15.0021 | 3.5563  | 4.0863  |
| <i>DoTPS17</i> | 0.0000  | 0.0000  | 0.0000  | 0.0268  | 0.0000  | 0.0100  |
| <i>DoTPS18</i> | 0.9556  | 0.6541  | 0.4678  | 1.2828  | 1.0808  | 1.0943  |
| <i>DoTPS19</i> | 0.1200  | 0.0229  | 0.1218  | 0.1151  | 0.1200  | 0.1753  |
| <i>DoTPS20</i> | 1.2828  | 0.6541  | 0.4678  | 0.9556  | 1.0808  | 1.0943  |
| <i>DoTPS21</i> | 1.2114  | 0.4076  | 1.3413  | 3.3646  | 2.1892  | 1.5833  |
| <i>DoTPS22</i> | 0.0000  | 0.0000  | 0.0000  | 0.0260  | 0.0260  | 0.0000  |
| <i>DoTPS23</i> | 0.8701  | 0.9705  | 0.7816  | 0.0611  | 0.5352  | 0.0100  |
| <i>DoTPS24</i> | 0.0000  | 0.0000  | 0.0000  | 0.1234  | 0.0274  | 0.0900  |
| <i>DoTPS25</i> | 0.2291  | 0.1046  | 0.0000  | 0.0645  | 0.2141  | 5.5846  |
| <i>DoTPS26</i> | 0.0258  | 0.0800  | 0.0500  | 0.0000  | 0.0000  | 0.0000  |
| <i>DoTPS27</i> | 0.0000  | 0.0000  | 0.0000  | 0.0220  | 0.0000  | 0.0204  |
| <i>DoTPS28</i> | 0.0257  | 0.0453  | 0.0239  | 0.5664  | 0.3466  | 0.3113  |
| <i>DoTPS29</i> | 0.2685  | 0.1499  | 0.2396  | 12.2277 | 1.1678  | 0.1228  |
| <i>DoTPS30</i> | 0.0000  | 0.0000  | 0.1712  | 0.5352  | 0.8701  | 0.7816  |
| <i>DoTPS31</i> | 8.4991  | 7.3799  | 7.5907  | 12.3982 | 14.3222 | 10.5718 |
| <i>DoTPS32</i> | 14.8624 | 10.7031 | 11.3577 | 11.9571 | 11.8444 | 13.2613 |
| <i>DoTPS33</i> | 0.0900  | 0.0374  | 1.1500  | 0.0000  | 0.0000  | 0.0000  |
| <i>DoTPS34</i> | 0.0000  | 0.0414  | 0.0000  | 0.2396  | 0.1499  | 0.2685  |

All FPKM values were retrieved from a reported transcriptome database <sup>[29]</sup>. Treatments was made up of cold acclimation (0°C for 20 h, CA) and non-acclimation (20°C for 20 h, CK).

Table S10 The expression values of *DoTPS* genes in response to 200 mM mannitol treatment for 48 h.

| Gene ID        | MeJA-0 h | MeJA-12 h | MeJA-24 h | MeJA-48 h |
|----------------|----------|-----------|-----------|-----------|
| <i>DoTPS1</i>  | 0.1933   | 1.6602    | 1.1917    | 0.0750    |
| <i>DoTPS2</i>  | 0.8195   | 13.8851   | 8.6327    | 2.4095    |
| <i>DoTPS3</i>  | 6.1303   | 39.9956   | 16.9366   | 4.3490    |
| <i>DoTPS4</i>  | 1.2011   | 21.9405   | 20.1309   | 0.4633    |
| <i>DoTPS5</i>  | 0.4101   | 1.2579    | 1.2293    | 0.8729    |
| <i>DoTPS6</i>  | 0.0361   | 0.3785    | 0.6501    | 0.0916    |
| <i>DoTPS7</i>  | 0.1185   | 2.7562    | 1.8431    | 0.3405    |
| <i>DoTPS8</i>  | 23.5785  | 67.9417   | 85.4984   | 33.8374   |
| <i>DoTPS9</i>  | 0.8135   | 36.7045   | 21.6445   | 2.4708    |
| <i>DoTPS10</i> | 0.5484   | 13.8014   | 20.4691   | 0.5889    |
| <i>DoTPS11</i> | 0.1555   | 0.1789    | 0.1521    | 0.0499    |
| <i>DoTPS12</i> | 0.1481   | 0.1598    | 0.1419    | 0.0958    |
| <i>DoTPS13</i> | 26.8832  | 156.4808  | 140.3864  | 47.9339   |
| <i>DoTPS14</i> | 0.1290   | 0.8303    | 0.4973    | 0.1922    |
| <i>DoTPS15</i> | 0.1598   | 0.5396    | 0.6297    | 0.2608    |
| <i>DoTPS16</i> | 0.4317   | 3.5311    | 4.6591    | 0.3621    |
| <i>DoTPS17</i> | 2.5886   | 5.6565    | 4.4752    | 3.8197    |
| <i>DoTPS18</i> | 9.7912   | 35.5316   | 30.2294   | 5.3614    |
| <i>DoTPS19</i> | 0.5337   | 0.9874    | 0.4997    | 0.5743    |
| <i>DoTPS20</i> | 0.2734   | 0.3123    | 0.7531    | 0.1291    |
| <i>DoTPS21</i> | 0.7547   | 25.4705   | 34.7946   | 0.6974    |
| <i>DoTPS22</i> | 1.5664   | 10.0653   | 6.8606    | 0.2356    |
| <i>DoTPS23</i> | 5.7882   | 11.4549   | 9.8674    | 2.5557    |
| <i>DoTPS24</i> | 0.9002   | 0.9873    | 0.8631    | 0.7432    |
| <i>DoTPS25</i> | 0.0566   | 0.8189    | 0.7273    | 0.1050    |
| <i>DoTPS26</i> | 5.5219   | 10.1560   | 12.4607   | 23.2561   |
| <i>DoTPS27</i> | 4.5398   | 22.5801   | 9.6888    | 4.7090    |
| <i>DoTPS28</i> | 6.8520   | 4.5228    | 4.9056    | 5.8451    |
| <i>DoTPS29</i> | 9.5300   | 17.8871   | 15.5421   | 11.6043   |
| <i>DoTPS30</i> | 0.3827   | 1.0406    | 1.0023    | 0.6329    |
| <i>DoTPS31</i> | 1.1175   | 0.4629    | 0.6216    | 1.5712    |
| <i>DoTPS32</i> | 0.9362   | 0.4098    | 0.5825    | 0.8163    |
| <i>DoTPS33</i> | 1.2334   | 2.3022    | 3.4734    | 1.7218    |
| <i>DoTPS34</i> | 0.0345   | 0.7113    | 0.2138    | 0.0780    |

Table S11 The expression values of *DoTPS* genes in at three flowering stages of *D. officinale*.

|         | B1       | B2       | B3       | S1        | S2        | S3        | F1       | F2       | F3       |
|---------|----------|----------|----------|-----------|-----------|-----------|----------|----------|----------|
| DoTPS1  | 0.8354   | 0.8348   | 0.5920   | 5.5536    | 6.1455    | 5.1733    | 43.3164  | 37.8553  | 44.3107  |
| DoTPS2  | 0.0771   | 0.0000   | 0.0000   | 0.2770    | 0.1674    | 0.6346    | 0.4768   | 0.7810   | 0.6779   |
| DoTPS3  | 3.9852   | 4.8716   | 3.3371   | 17.1842   | 22.9828   | 20.7984   | 24.9471  | 29.9034  | 28.2281  |
| DoTPS4  | 0.0000   | 0.0395   | 0.0000   | 0.1083    | 0.1239    | 0.1783    | 0.0389   | 0.0000   | 0.0000   |
| DoTPS5  | 0.0000   | 0.0000   | 0.6293   | 0.3093    | 1.0851    | 0.0000    | 0.6199   | 0.0000   | 0.2888   |
| DoTPS6  | 0.0057   | 0.0040   | 0.0044   | 0.0040    | 0.0044    | 0.0040    | 0.0044   | 0.0000   | 0.0000   |
| DoTPS7  | 2.9934   | 2.2824   | 2.7800   | 0.9494    | 1.1183    | 1.5537    | 0.2612   | 0.5734   | 0.6133   |
| DoTPS8  | 0.0000   | 0.0006   | 0.0000   | 0.4696    | 0.3430    | 0.2595    | 0.0000   | 0.3431   | 0.0299   |
| DoTPS9  | 0.0120   | 0.0134   | 0.0112   | 0.0000    | 0.0040    | 0.0044    | 0.0000   | 0.0004   | 0.0000   |
| DoTPS10 | 223.2744 | 229.3890 | 216.2026 | 3234.7494 | 3217.9300 | 3179.3628 | 891.4052 | 652.9398 | 630.1163 |
| DoTPS11 | 0.0090   | 0.0047   | 0.0035   | 0.0040    | 0.0037    | 0.0040    | 0.0044   | 0.0000   | 0.0000   |
| DoTPS12 | 0.0000   | 0.0003   | 0.0001   | 0.0000    | 0.0000    | 0.0000    | 0.1042   | 0.0000   | 0.0000   |
| DoTPS13 | 0.0000   | 0.0000   | 0.0000   | 0.1851    | 0.2798    | 0.2012    | 0.8726   | 0.1745   | 0.2143   |
| DoTPS14 | 0.8456   | 0.7260   | 1.1031   | 0.3094    | 0.3188    | 0.3702    | 4.7988   | 4.8901   | 4.5217   |
| DoTPS15 | 0.0003   | 0.0000   | 0.0003   | 0.0287    | 0.0295    | 0.0000    | 0.0002   | 0.0004   | 0.0000   |
| DoTPS16 | 2.3237   | 2.7277   | 2.4948   | 0.0000    | 0.2986    | 0.0324    | 0.5068   | 0.0328   | 0.3382   |
| DoTPS17 | 0.0023   | 0.0013   | 0.0022   | 0.0040    | 0.0044    | 0.0000    | 0.0040   | 0.0070   | 0.0000   |
| DoTPS18 | 0.0807   | 0.0640   | 0.1211   | 0.0000    | 0.0011    | 0.0000    | 0.0053   | 0.0000   | 0.0023   |
| DoTPS19 | 5.4240   | 5.0955   | 6.1791   | 17.2144   | 19.5407   | 18.3601   | 11.1548  | 12.3520  | 10.0018  |
| DoTPS20 | 14.2348  | 15.0919  | 15.4891  | 13.7248   | 13.6509   | 14.0405   | 4.4426   | 6.9192   | 5.0905   |
| DoTPS21 | 84.8295  | 77.6592  | 88.9460  | 627.2865  | 656.8730  | 774.5678  | 139.1584 | 134.5610 | 130.4231 |
| DoTPS22 | 0.1041   | 0.0000   | 0.0000   | 0.0000    | 0.0000    | 0.0000    | 0.0000   | 0.0000   | 0.0000   |
| DoTPS23 | 15.3781  | 18.0934  | 14.8088  | 13.3106   | 20.8759   | 12.2737   | 3.9390   | 3.5389   | 3.4028   |
| DoTPS24 | 7.3896   | 7.8489   | 9.5586   | 114.7701  | 102.1070  | 112.7620  | 160.4668 | 196.0226 | 135.9785 |
| DoTPS25 | 0.0761   | 0.0177   | 0.0583   | 1.0937    | 0.8031    | 0.0239    | 0.0332   | 0.1064   | 0.0893   |
| DoTPS26 | 0.3991   | 0.3511   | 0.9803   | 0.0000    | 0.0117    | 0.0641    | 0.0000   | 0.0001   | 0.0000   |
| DoTPS27 | 0.0012   | 0.0000   | 0.0012   | 0.0067    | 0.0038    | 0.0000    | 33.3199  | 37.7800  | 35.2909  |
| DoTPS28 | 249.8680 | 227.5599 | 232.3214 | 2.4423    | 2.9088    | 3.2606    | 0.6343   | 0.5608   | 0.4010   |
| DoTPS29 | 0.0003   | 0.0007   | 0.0005   | 0.0000    | 0.0017    | 0.0270    | 0.0691   | 0.0514   | 0.1174   |
| DoTPS30 | 0.0466   | 0.0000   | 0.0266   | 0.0367    | 0.0000    | 0.0000    | 0.0003   | 0.0001   | 0.0000   |
| DoTPS31 | 16.6555  | 12.2840  | 15.7901  | 12.6694   | 6.0019    | 25.8597   | 2.7267   | 8.9457   | 7.8824   |
| DoTPS32 | 10.8991  | 10.4409  | 10.5708  | 3.0542    | 5.2010    | 4.7502    | 5.1282   | 4.6255   | 5.3851   |
| DoTPS33 | 1.1276   | 0.4167   | 0.9774   | 2.3825    | 4.2775    | 5.0569    | 24.3645  | 21.7366  | 24.4755  |
| DoTPS34 | 0.0167   | 0.0709   | 0.1117   | 0.0000    | 0.0004    | 0.0003    | 0.0001   | 0.0002   | 0.0000   |

Three flowering stages of *D. officinale* include budding (B), semi-flowering (S) and full flowering (F).

Table S12 Functional annotation of DoTPS with Terzyme (<http://www.nipgr.ac.in/terzyme.html>).

| Gene sequence ID                | Score  | E-value               | No. of domains |
|---------------------------------|--------|-----------------------|----------------|
| Putative monoterpene synthase   |        |                       |                |
| DoTPS28                         | 657.1  | 3.8×e <sup>-200</sup> | 1              |
| DoTPS10                         | 649.4  | 8.4×e <sup>-198</sup> | 1              |
| DoTPS21                         | 643.2  | 6.2×e <sup>-196</sup> | 1              |
| DoTPS34                         | 642.9  | 7.5×e <sup>-196</sup> | 1              |
| DoTPS25                         | 637.0  | 4.7×e <sup>-194</sup> | 1              |
| DoTPS23                         | 631.6  | 2.0×e <sup>-192</sup> | 1              |
| DoTPS18                         | 622.9  | 8.7×e <sup>-190</sup> | 1              |
| DoTPS20                         | 619.6  | 9.0×e <sup>-189</sup> | 1              |
| DoTPS27                         | 604.7  | 2.9×e <sup>-184</sup> | 1              |
| DoTPS3                          | 604.0  | 4.6×e <sup>-184</sup> | 1              |
| DoTPS2                          | 598.2  | 2.6×e <sup>-182</sup> | 1              |
| DoTPS33                         | 554.1  | 5.9×e <sup>-169</sup> | 1              |
| DoTPS30                         | 534.5  | 5.2×e <sup>-163</sup> | 1              |
| DoTPS19                         | 477.7  | 8.0×e <sup>-146</sup> | 2              |
| DoTPS24                         | 394.2  | 1.6×e <sup>-120</sup> | 1              |
| DoTPS1                          | 233.4  | 7.4×e <sup>-72</sup>  | 1              |
| Putative sesquiterpene synthase |        |                       |                |
| DoTPS9                          | 701.4  | 1.6×e <sup>-213</sup> | 1              |
| DoTPS5                          | 673.8  | 3.2×e <sup>-205</sup> | 1              |
| DoTPS29                         | 672.6  | 8.1×e <sup>-205</sup> | 1              |
| DoTPS7                          | 670.8  | 2.6×e <sup>-204</sup> | 1              |
| DoTPS22                         | 669.9  | 4.8×e <sup>-204</sup> | 1              |
| DoTPS17                         | 668.3  | 1.7×e <sup>-203</sup> | 1              |
| DoTPS6                          | 663.6  | 4.3×e <sup>-202</sup> | 1              |
| DoTPS26                         | 661.8  | 1.4×e <sup>-201</sup> | 1              |
| DoTPS16                         | 658.7  | 1.3×e <sup>-200</sup> | 1              |
| DoTPS15                         | 637.5  | 3.5×e <sup>-194</sup> | 1              |
| DoTPS13                         | 615.2  | 2.1×e <sup>-187</sup> | 1              |
| DoTPS11                         | 309.7  | 6.2×e <sup>-95</sup>  | 1              |
| DoTPS8                          | 211.9  | 2.7×e <sup>-65</sup>  | 1              |
| DoTPS12                         | 156.5  | 1.6×e <sup>-48</sup>  | 2              |
| Putative diterpene synthase     |        |                       |                |
| DoTPS32                         | 1029.5 | 0.0                   | 1              |
| DoTPS4                          | 622.0  | 2.4×e <sup>-189</sup> | 1              |
| DoTPS14                         | 592.3  | 2.3×e <sup>-180</sup> | 1              |
| DoTPS31                         | 249.0  | 1.5×e <sup>-76</sup>  | 2              |

Table S13 CGTCA-motif, G-box and MYC motif in the promoter region of *DoTPS* genes.

| Gene           | CGTCA-motif |                                            | MYC motif |                                                     | G-box  |                               |
|----------------|-------------|--------------------------------------------|-----------|-----------------------------------------------------|--------|-------------------------------|
|                | Number      | Position                                   | Number    | Position                                            | Number | Position                      |
| <i>DoTPS1</i>  | 1           | +638                                       | 4         | -327, +207, +474, +1329                             | 4      | -884, -1065, +636, +1140      |
| <i>DoTPS2</i>  | 2           | -1464, -1756                               | 4         | -469, -505, -710, +576                              | 1      | -209                          |
| <i>DoTPS3</i>  | 3           | -331, -1745, +293                          | 8         | -18, -122, -1149, -1182, -1304, -1591, +1040, +1197 | 4      | -998, -1835, +455, +1834      |
| <i>DoTPS4</i>  | 0           |                                            | 1         | -294                                                | 1      | +684                          |
| <i>DoTPS5</i>  | 3           | +832, +858, +1870                          | 7         | -77, -1187, -1412, +31, +69, +83, -730              | 2      | +1868, +1916                  |
| <i>DoTPS6</i>  | 1           | +95                                        | 4         | -992, -1154, -1800, -1911                           | 5      | -341, -365, -724, +724, +1548 |
| <i>DoTPS7</i>  | 1           | +312                                       | 3         | -212, -629, +70                                     | 3      | +652, +698, +762              |
| <i>DoTPS8</i>  | 3           | -468, -789, +419                           | 3         | -1152, -1282, +924                                  | 0      |                               |
| <i>DoTPS9</i>  | 0           |                                            | 7         | -26, -1582, -1614, -1654, +128, +1628, +1978        | 2      | -241, -1513                   |
| <i>DoTPS10</i> | 2           | -737, -782                                 | 7         | -548, -687, -1049, -1129, -1470, +216, +519         | 3      | -93, -1114, -1848             |
| <i>DoTPS11</i> | 0           |                                            | 1         | -506                                                | 0      |                               |
| <i>DoTPS12</i> | 1           | -1933                                      | 2         | -1159, +845                                         | 3      | -1548, +1229, +1545           |
| <i>DoTPS13</i> | 0           |                                            | 2         | -781, +1090                                         | 1      | -638                          |
| <i>DoTPS14</i> | 1           | -1150                                      | 7         | -290, -359, -1805, -1913, +246, +673, +1320         | 2      | -621, -1151                   |
| <i>DoTPS15</i> | 0           |                                            | 5         | -234, -1269, -1466, -1860, +159                     | 2      | +899, +900                    |
| <i>DoTPS16</i> | 7           | -53, -967, -981, -1024, +1045, -1218, +886 | 5         | -49, -889, -1258, +902, +995                        | 0      |                               |
| <i>DoTPS17</i> | 1           | +1511                                      | 4         | -427, -821, -1650, +414                             | 2      | -483, +612                    |
| <i>DoTPS18</i> | 0           |                                            | 3         | -1288, +633, +1501                                  | 1      | -1910                         |
| <i>DoTPS19</i> | 1           | -1048                                      | 5         | -276, -1252, +1399, +1835, +1927                    | 0      |                               |
| <i>DoTPS20</i> | 2           | -663, +1720                                | 7         | -222, -785, -833, +191, +690, +1079, -1112          | 0      |                               |
| <i>DoTPS21</i> | 1           | -1093                                      | 6         | -1154, -1465, -1646, -1692, +165, +518              | 1      | -1223                         |
| <i>DoTPS22</i> | 2           | +741, +750                                 | 1         | +175                                                | 1      | +1916                         |
| <i>DoTPS23</i> | 1           | -1877                                      | 4         | -584, +124, +771, +1346                             | 2      | -1052, -1878                  |

|                |   |                                              |   |                                       |   |                              |
|----------------|---|----------------------------------------------|---|---------------------------------------|---|------------------------------|
| <i>DoTPS24</i> | 0 |                                              | 2 | +797, +1950                           | 0 |                              |
| <i>DoTPS25</i> | 7 | -175, -1072, -1209, -1337, +583, +677, +1000 | 4 | -384, +72, +1733, +1783               | 4 | -1666, +613, +1066, +1225    |
| <i>DoTPS26</i> | 0 |                                              | 2 | -669, +115                            | 1 | +662                         |
| <i>DoTPS27</i> | 2 | -1544, +1112                                 | 4 | +436, +726, +1230, +1951              | 2 | -1545, +976                  |
| <i>DoTPS28</i> | 0 |                                              | 4 | -630, -664, -1403, +1901              | 5 | -156, -180, +183, +203, +489 |
| <i>DoTPS29</i> | 0 |                                              | 1 | -431                                  | 0 |                              |
| <i>DoTPS30</i> | 1 | +1443                                        | 6 | -1000, -1448, +282, +495, +968, +1663 | 1 | +231                         |
| <i>DoTPS31</i> | 1 | -774                                         | 1 | +183                                  | 1 | -1713                        |
| <i>DoTPS32</i> | 2 | +875, +906                                   | 1 | -1212                                 | 3 | -585, -1106, +587            |
| <i>DoTPS33</i> | 0 |                                              | 3 | -1336, -1503, +1781                   | 1 | +1626                        |
| <i>DoTPS34</i> | 1 | -651                                         | 4 | -468, -1502, -1715, +973              | 2 | -955, +1451                  |

---

Table S14 Primers used for RT-qPCR analysis, DoTPS10 cloning and vector construction.

| Gene           | Primer                    |
|----------------|---------------------------|
| <i>DoTPS1</i>  | F CCTCACTCTTCCATGAGGAAAT  |
|                | R CGAAGAAGCTGGAAGCAAATAG  |
| <i>DoTPS2</i>  | F AGCACAGCGCTCAGTATTT     |
|                | R TCTTCGAAAGGAAGTGGAAGAG  |
| <i>DoTPS3</i>  | F GTAATCTAGCTGGTGGTGAGTT  |
|                | R GTTGAGAAACGAGGTTCCATTG  |
| <i>DoTPS4</i>  | F ACATTGAAGGAGGAGGGATCTA  |
|                | R GCAAGTTGGAGGAGGTCATTAT  |
| <i>DoTPS5</i>  | F TGTTTATGGGACAGTCGAAGAG  |
|                | R GGAACTCGTGTTGCATGTATTG  |
| <i>DoTPS6</i>  | F ACACTTATTACTGCTGGCTACTC |
|                | R TGATCTCTGGGAAGCTTGTAAC  |
| <i>DoTPS7</i>  | F GGGTAACTGGTATGCCTCTAATC |
|                | R TAGCATTGGACAGCTGAAGG    |
| <i>DoTPS8</i>  | F GAAGTCATTGATCTGCAAGATGG |
|                | R CTTGAACCGATCAGGTGTTCTA  |
| <i>DoTPS9</i>  | F ACACTTATTACTGCTGGCTACTC |
|                | R GGAAGCTTGTAACCCAATCAAAG |
| <i>DoTPS10</i> | F GCTGCCTCTCAACAGCTAATA   |
|                | R CTGGAAGCGATTGGATGTAGT   |
| <i>DoTPS11</i> | F CAGAGTGGTGGAAAGGATTAGG  |
|                | R GTGAATAGCAGGGTTCAGAGTAA |
| <i>DoTPS12</i> | F CTA CTGAGGCAGCAACGATTTA |
|                | R TCAAAGTATGTGCCTGTCATCC  |
| <i>DoTPS13</i> | F CGATGAGCATGAAGAGAGAGAC  |
|                | R CCATGCATCCTCCACCATTA    |
| <i>DoTPS14</i> | F AGTCATTGTGGTTCGAGGAAG   |
|                | R CAGATACTGGTACGAAGGCATAC |
| <i>DoTPS15</i> | F AGCATCTAGGAGTGGCCTAT    |
|                | R AATCGTTGCTGCCTCAGTAG    |
| <i>DoTPS16</i> | F GATCTGCTAGCTGTIGCTCTAA  |
|                | R TGCTCTTAAACCTCCCTTCATC  |
| <i>DoTPS17</i> | F TAGGCTTCTCCAAACACTTACC  |
|                | R GGGCATCACCTTTGACATAATC  |
| <i>DoTPS18</i> | F TGATGCTTATGAGAGGCAAGAG  |
|                | R TCATCGCTAGCAAGACCAATAC  |
| <i>DoTPS19</i> | F GCAAGAGATAGGTTGATGGAGAC |
|                | R TGAGGCAACCTAGTTTGGTAATC |
| <i>DoTPS20</i> | F GCCTTTACGAGGCTTCTTATCT  |
|                | R TTGTTCCACTAACGAGGGATG   |
| <i>DoTPS21</i> | F GCCAACCATTTGGGATGATAAC  |
|                | R AAACACCTGACTTCCTCCTTC   |

|                                  |   |                                         |
|----------------------------------|---|-----------------------------------------|
| <i>DoTPS22</i>                   | F | ACCTCAAAGAGGAGGAGAAGA                   |
|                                  | R | AAGGCTGACGGCCAAATAA                     |
| <i>DoTPS23</i>                   | F | GCTTATGAGAGGCAAGAGAACA                  |
|                                  | R | CCACCAACTAGACATCTCCTTAAC                |
| <i>DoTPS24</i>                   | F | TTACAAGGTGGTGGGCAAA                     |
|                                  | R | TGCTAAACCTACGGCTAAGAAG                  |
| <i>DoTPS25</i>                   | F | CTTGTATGAGGCTTCCTTCCTT                  |
|                                  | R | GTAGCTCCAAGGCATGTTCTAT                  |
| <i>DoTPS26</i>                   | F | TGAGAGAGAGGGTGGGAAGAA                   |
|                                  | R | GCCTAGGCGTTGAAGAGAAT                    |
| <i>DoTPS27</i>                   | F | AAGTGGTGGGCAGAAGTAAG                    |
|                                  | R | CAGCCATACCAACAGCTAGAA                   |
| <i>DoTPS28</i>                   | F | CCTCACCATCGCTTCCTATTC                   |
|                                  | R | AGCAGAAGAAGATGTTGCAGTA                  |
| <i>DoTPS29</i>                   | F | TCATGCGTACCTTCAGGAATC                   |
|                                  | R | GAGTACCCAGCTGTAATCAGTG                  |
| <i>DoTPS30</i>                   | F | ATAGATCACGCCTTGGAGTTAC                  |
|                                  | R | AAAGTTCTCTCGTCTCCATAAG                  |
| <i>DoTPS31</i>                   | F | CTGAAGCTGCCGATCCATATT                   |
|                                  | R | GCTCAATCGACCGAACTAACA                   |
| <i>DoTPS32</i>                   | F | CAAACACTCAGCGCAAACAT                    |
|                                  | R | ACATACTCCTCACCAACATTCC                  |
| <i>DoTPS33</i>                   | F | GCAACGACTTAGCAACATCATC                  |
|                                  | R | GATATGTACAGGCGAGCTTCTT                  |
| <i>DoTPS34</i>                   | F | TGCTTATGGGAGACGAGAGA                    |
|                                  | R | GTTCTTGTAGCTCCGCCTTAT                   |
| <i>DoEF-1<math>\alpha</math></i> | F | GCTTGAGAAGGAGCCCAAGT                    |
|                                  | R | CCAACAGCCACAGTTTGTCG                    |
| <i>DoTPS10-ORF</i>               | F | ATGGCTTTGTATTTTCGCCCT                   |
|                                  | R | AAGTGAATTGGTTCAATCATCA                  |
| <i>DoTPS10-pET32a</i>            | F | TTCGAGCTCCGTCGACATGGCTTTGTATTTTCGCCCT   |
|                                  | R | GGTGGTGGTGCTCGAGAAGTGGAATTGGTTCAATCATCA |
| <i>DoTPS10-YFP</i>               | F | CGAACGATAGCCATGGATGGCTTTGTATTTTCGCCCT   |
|                                  | R | TGAGTCCGGACCATGGAAGTGGAATTGGTTCAATCATCA |

---

Gene-specific primers for real-time reverse transcription quantitative PCR (RT-qPCR) were designed by the PrimerQuest online tool (<http://www.idtdna.com/Primerquest/Home/Index>). The *D. officinale* actin gene (DoEF-1 $\alpha$ ) was obtained from NCBI (GenBank accession no. JF825419). F, forward; R, reverse.



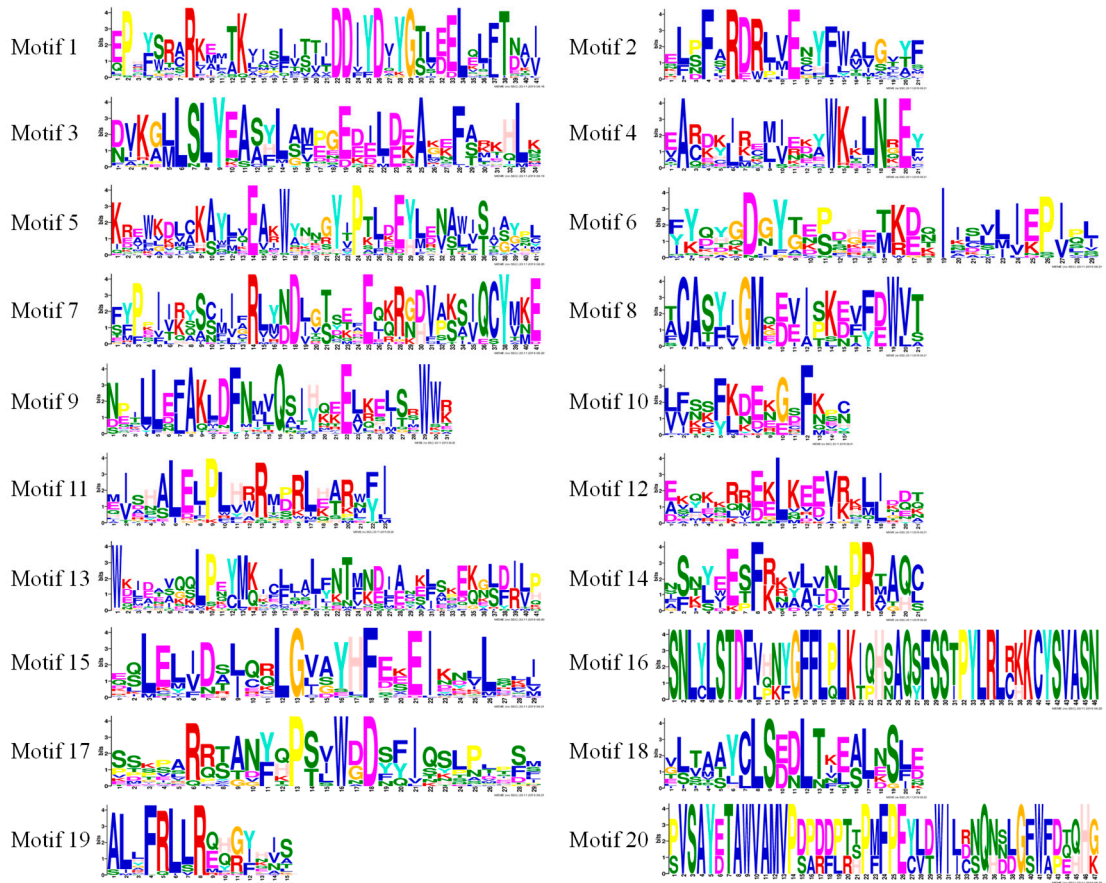

Figure S1 Distribution of conserved motifs in *D. officinale* TPS proteins based on the results of MEME analysis.

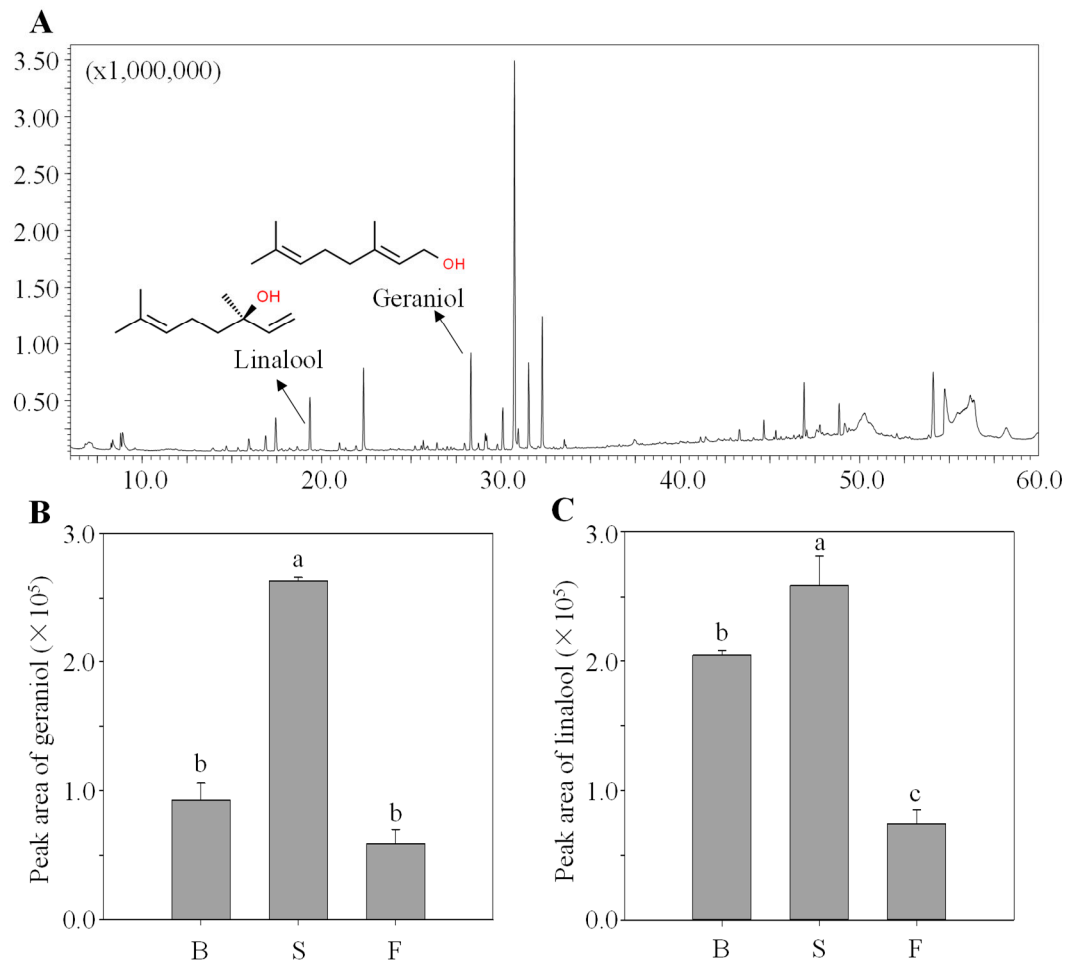

Figure S2 Content of geraniol and linalool in *D. officinale* at three flowering stages: budding (B), semi-flowering (S) and full flowering (F). Each bar represents the mean ( $\pm$  standard error,  $n = 3$ ) of three independent biological replicates. Different letters above the bars indicate significant differences ( $p < 0.05$ , Duncan's multiple range test).

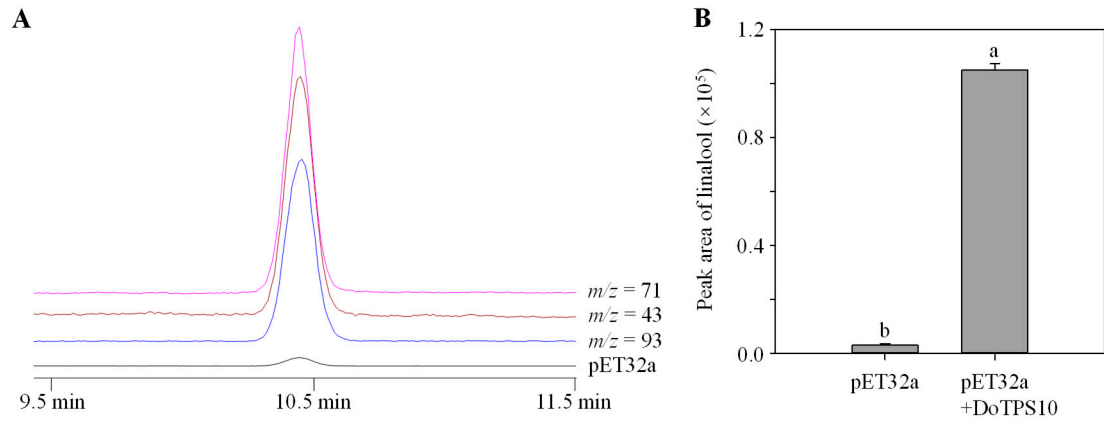

Figure S3 Gas chromatograms of products yielded by DoTPS10 using GPP as substrate. Each bar represents the mean ( $\pm$  standard error,  $n = 3$ ) of three independent biological replicates. Different letters above the bars indicate significant differences ( $p < 0.05$ , Duncan's multiple range test).
